# Supplementary material for: Filling the gap with a bulky diaryl boron group: fluorinated and non-fluorinated copper pyrazolates fitted with a dimesityl boron moiety on the backbone
Source: Royal Society of Chemistry journal article supplement (doi:10.1039/d3dt03167e), 2023-01-01
Supplement: d3dt03167e1.pdf [file d3dt03167e1.pdf]

## Filling the gap with a bulky diaryl boron: fluorinated and non-fluorinated copper pyrazolates fitted with a dimesityl boron moiety on the backbone

Mukundam Vanga,<sup>†</sup> Benjamin T. Diroll,<sup>‡\*</sup> Álvaro R. Muñoz-Castro,<sup>±\*</sup> H. V. Rasika Dias<sup>†\*</sup>

<sup>†</sup>Department of Chemistry and Biochemistry, The University of Texas at Arlington, Arlington, Texas 76019, USA; <sup>‡</sup>Center for Nanoscale Materials, Argonne National Laboratory, Argonne, Illinois 60439, USA; <sup>±</sup>Facultad de Ingeniería, Arquitectura y Diseño, Universidad San Sebastián, Bellavista 7, Santiago, 8420524, Chile

### Supporting information

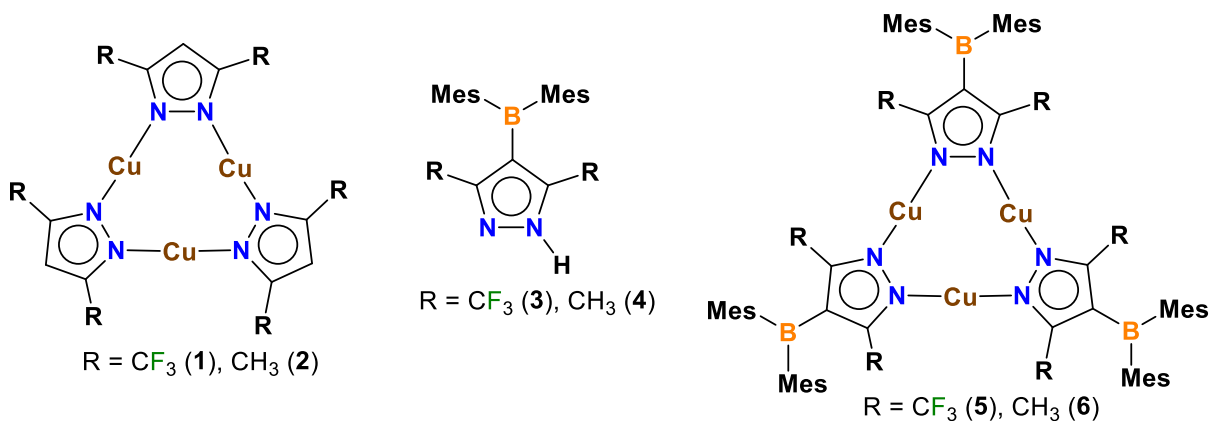

#### Molecules of focus

## **Table of Contents**

|                                  |    |
|----------------------------------|----|
| 1. Spectral Data .....           | 3  |
| 2. Structure Determinations..... | 13 |
| 3. Optical Properties.....       | 34 |
| 4. Computational Details.....    | 40 |

## 1. Spectral data

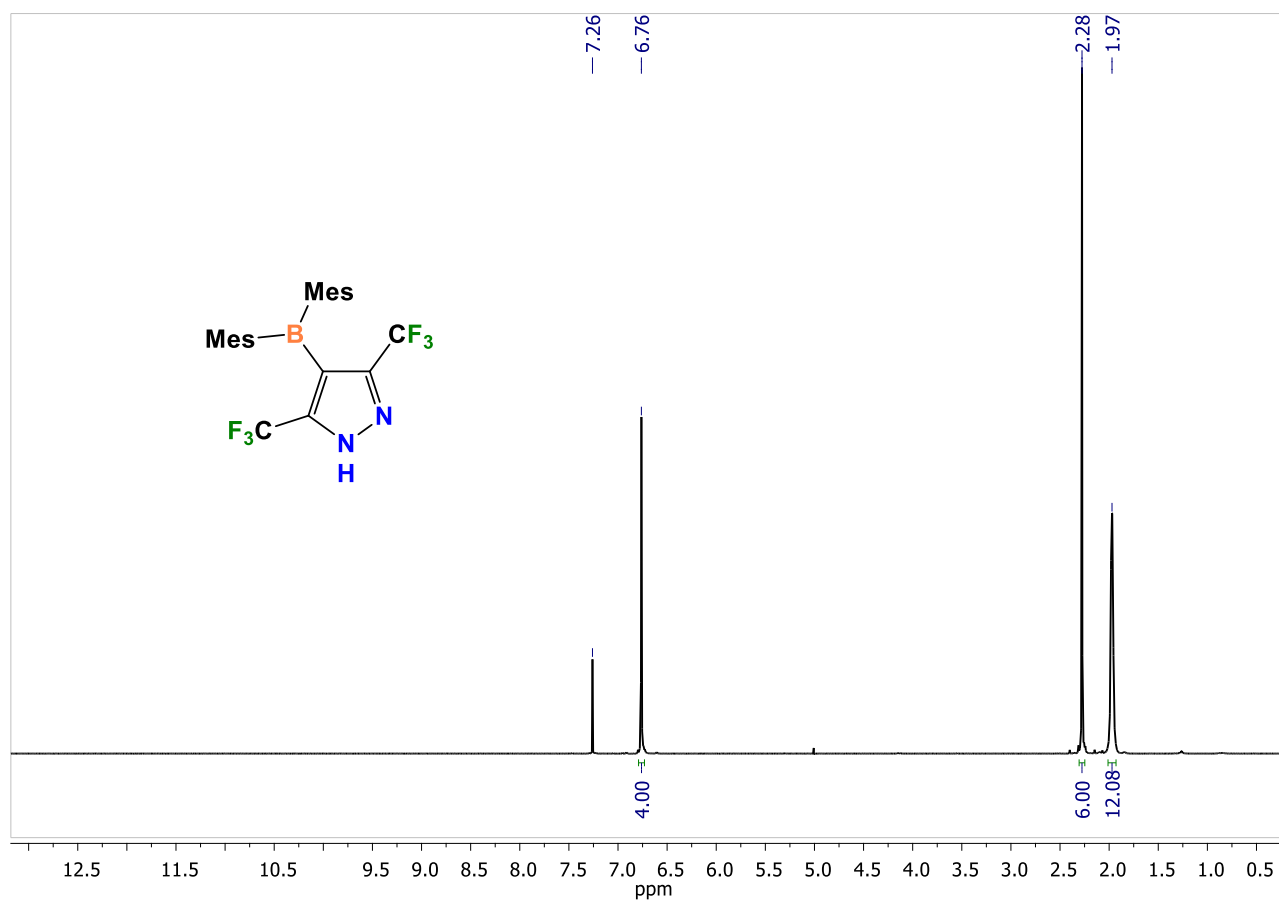

**Figure S1.** <sup>1</sup>H NMR spectrum of 4-BMes<sub>2</sub>-3,5-(CF<sub>3</sub>)<sub>2</sub>PzH (**3**) in CDCl<sub>3</sub>

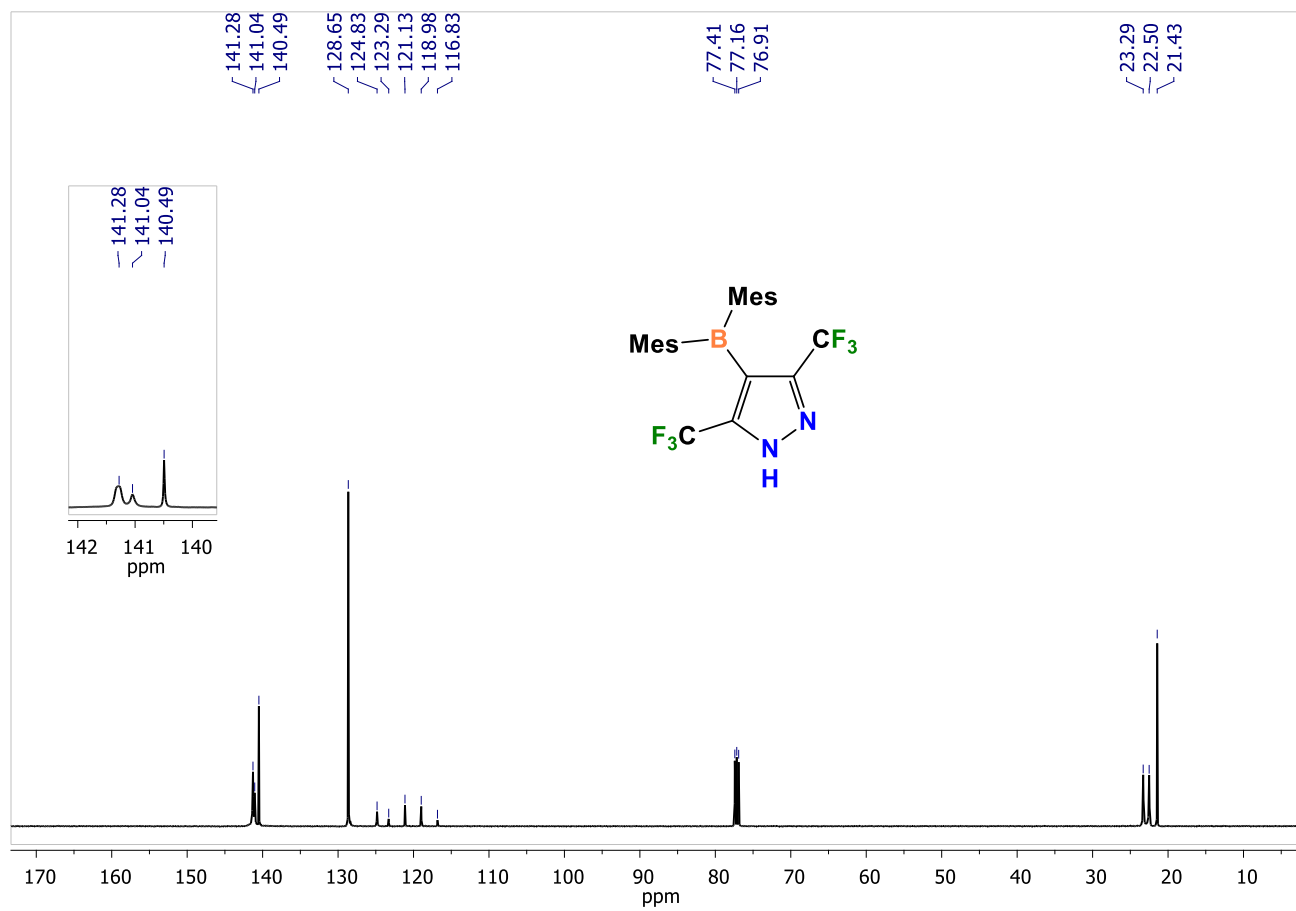

**Figure S2.**  $^{13}\text{C}$  NMR spectrum of 4-BMes<sub>2</sub>-3,5-(CF<sub>3</sub>)<sub>2</sub>PzH (**3**) in CDCl<sub>3</sub>

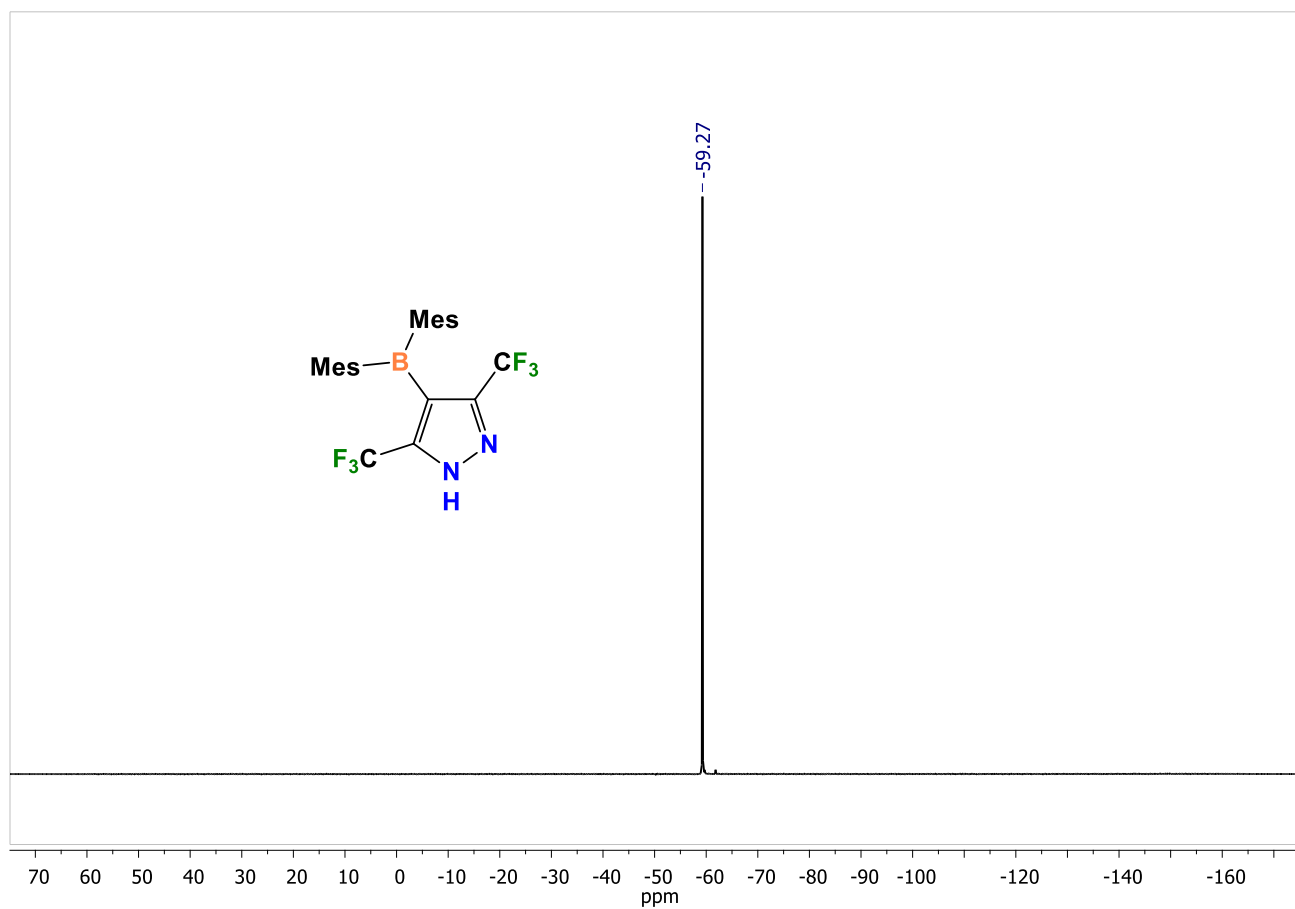

**Figure S3.**  $^{19}\text{F}$  NMR spectrum of 4-BMes<sub>2</sub>-3,5-(CF<sub>3</sub>)<sub>2</sub>PzH (**3**) in CDCl<sub>3</sub>

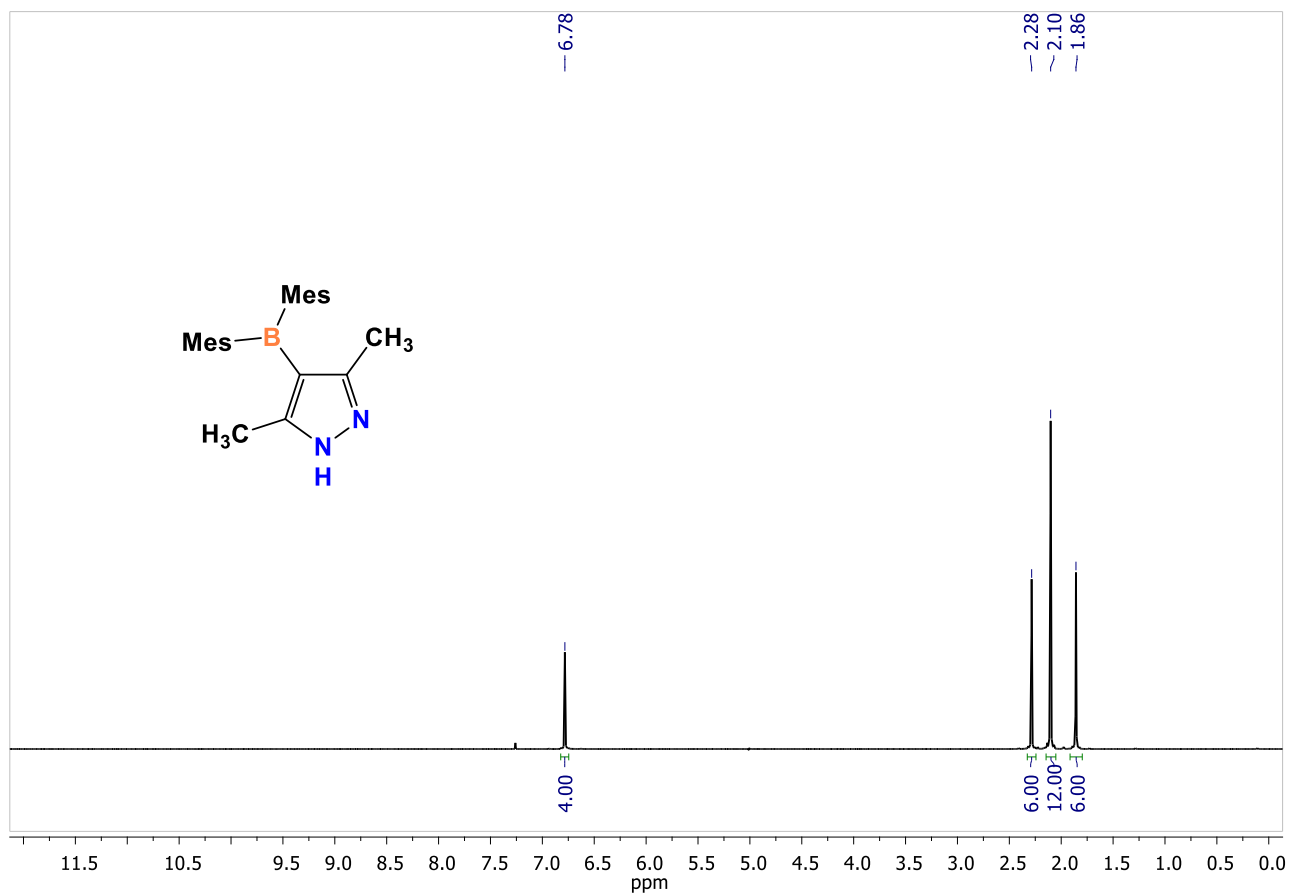

**Figure S4.** <sup>1</sup>H NMR spectrum of 4-BMes<sub>2</sub>-3,5-(CH<sub>3</sub>)<sub>2</sub>PzH (**4**) in CDCl<sub>3</sub>

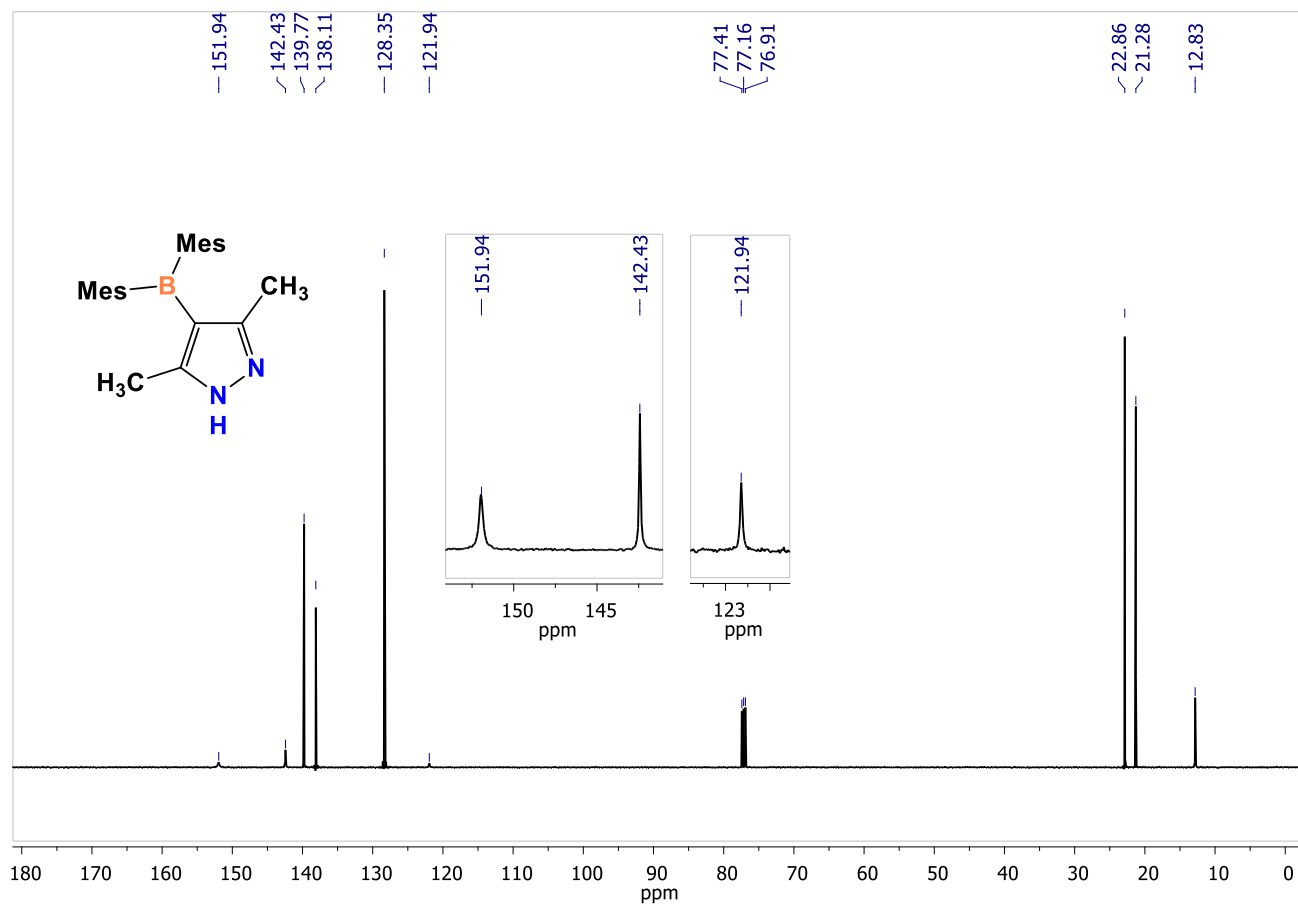

Figure S5. <sup>13</sup>C NMR spectrum of 4-BMes<sub>2</sub>-3,5-(CH<sub>3</sub>)<sub>2</sub>PzH (**4**) in CDCl<sub>3</sub>

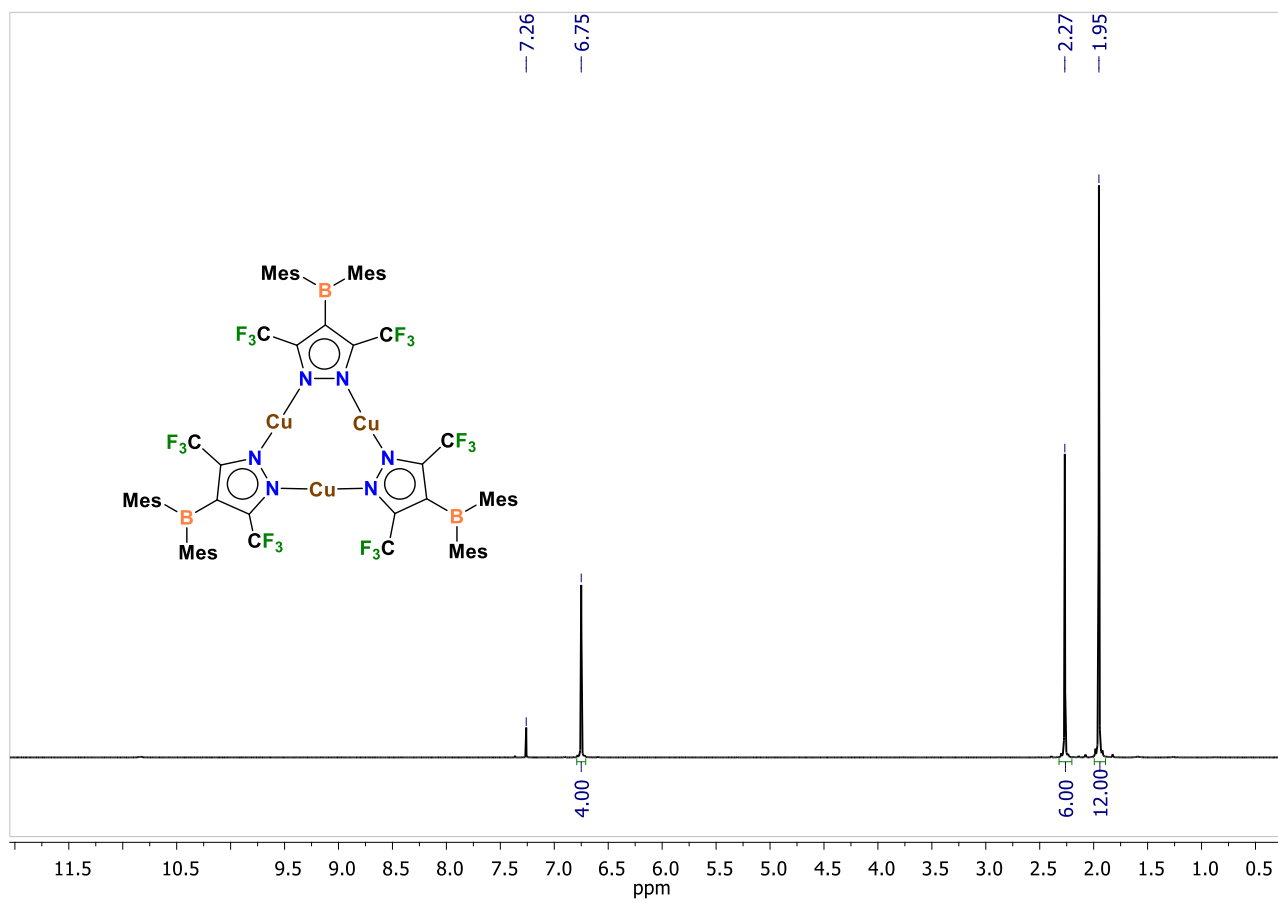

**Figure S6.** <sup>1</sup>H NMR spectrum of  $\{[4\text{-BMes}_2\text{-}3,5\text{-(CF}_3)_2\text{Pz}]\text{Cu}\}_3$  (**5**) in CDCl<sub>3</sub>



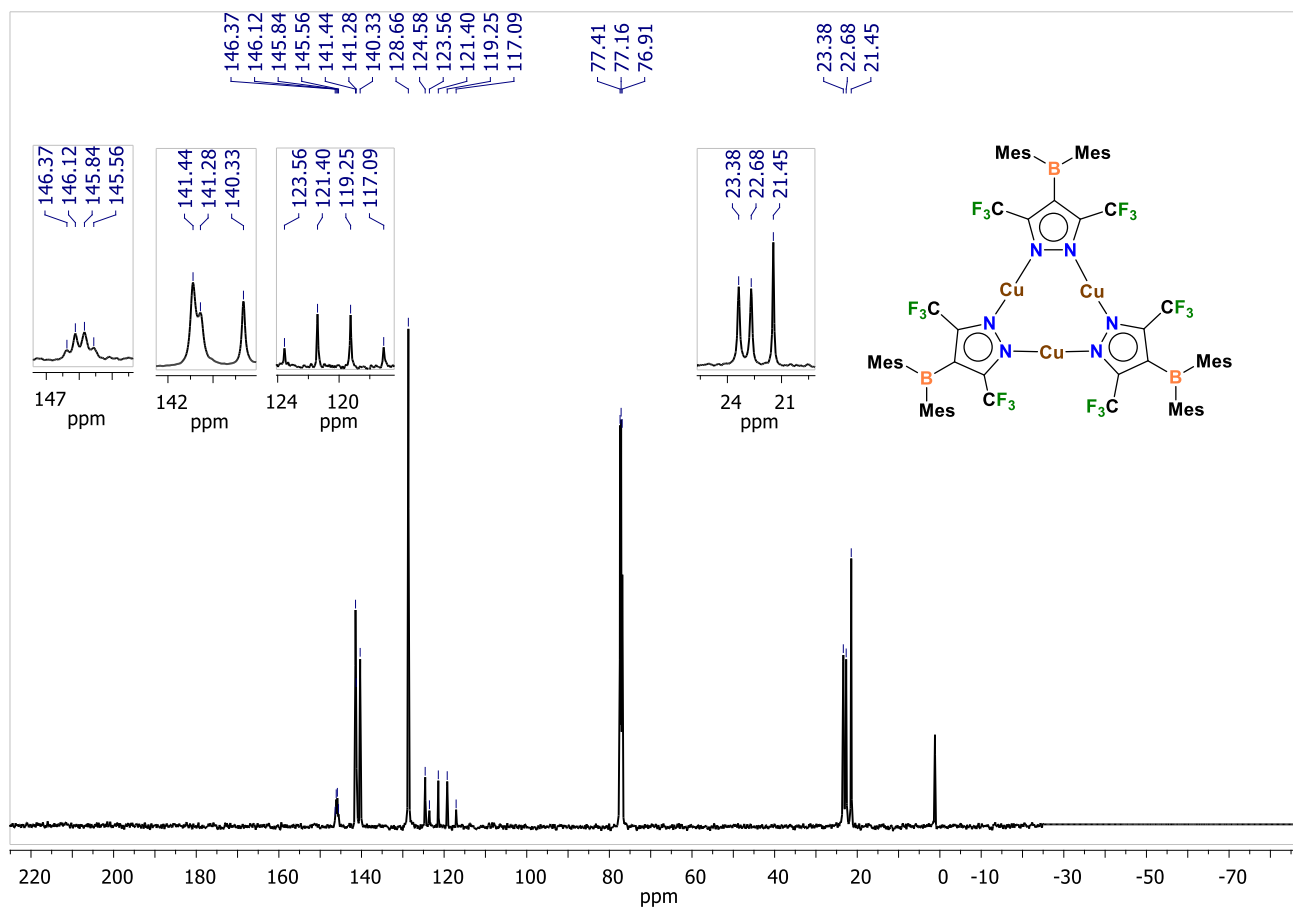

**Figure S7.**  $^{13}\text{C}$  NMR spectrum of  $\{[4\text{-BMes}_2\text{-}3,5\text{-(CF}_3)_2\text{Pz]Cu}\}_3$  (**5**) in  $\text{CDCl}_3$

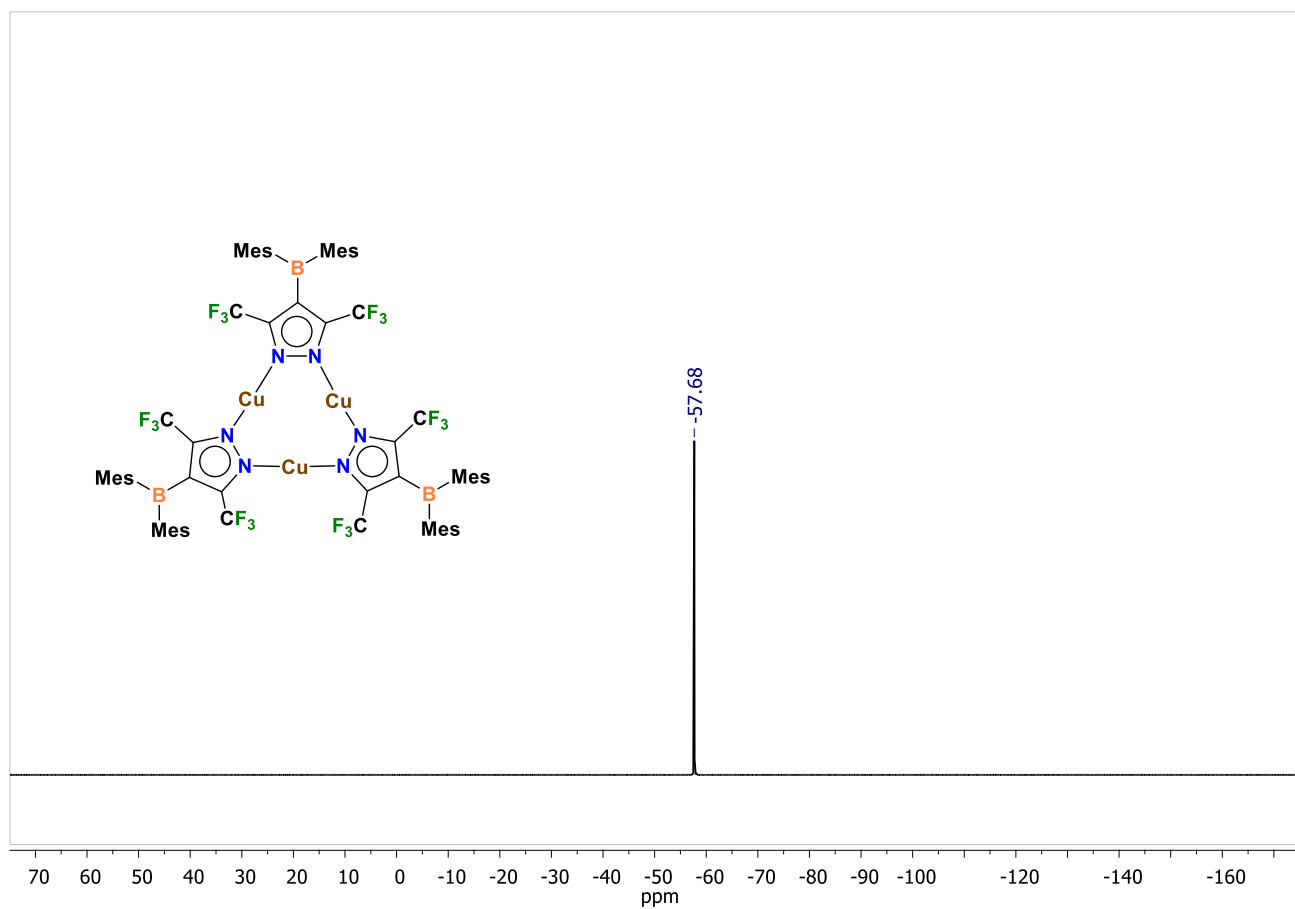

**Figure S8.**  $^{19}\text{F}$  NMR spectrum of  $\{[4\text{-BMes}_2\text{-}3,5\text{-(CF}_3)_2\text{PzCu}]_3\}$  (**5**) in  $\text{CDCl}_3$

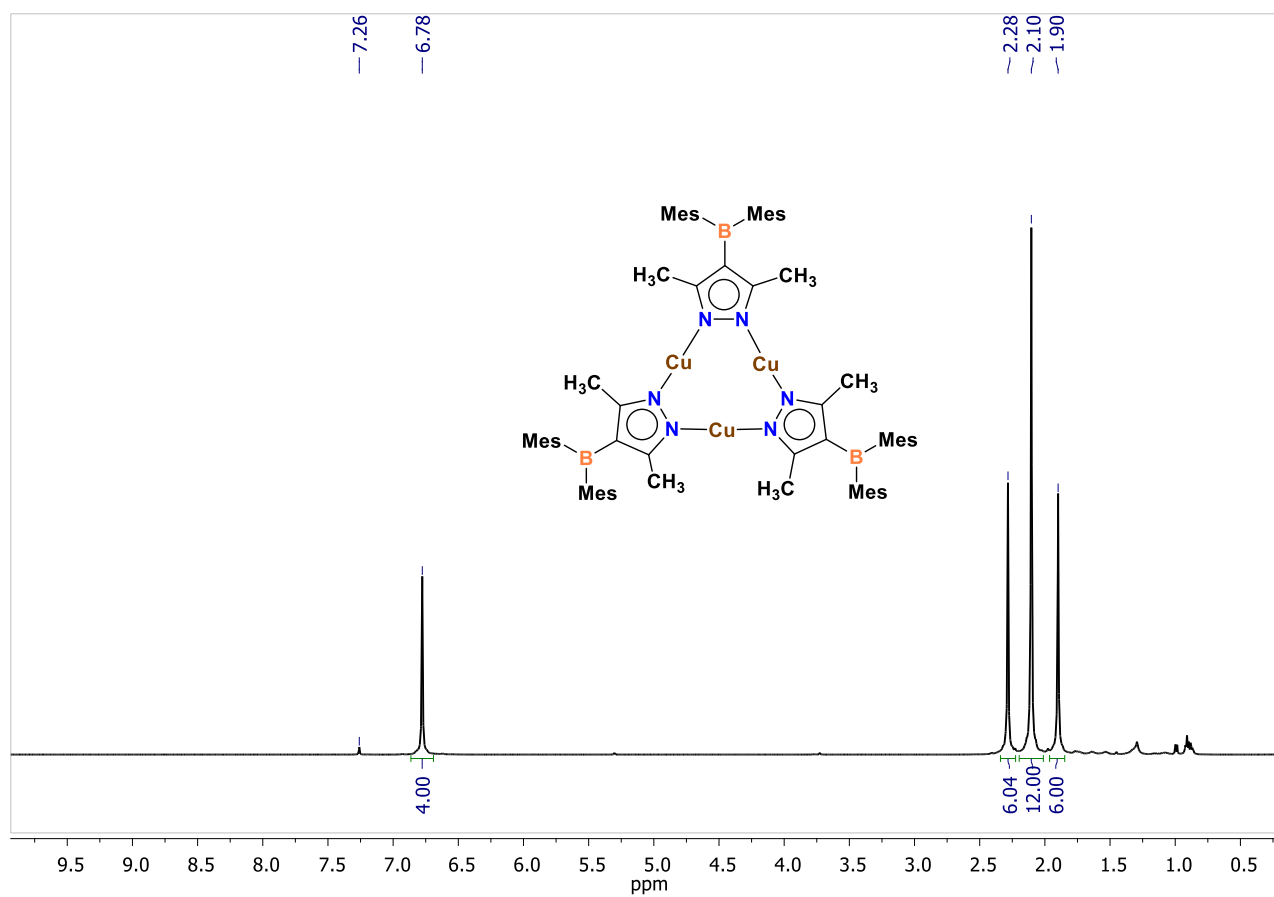

**Figure S9.** <sup>1</sup>H NMR spectrum of  $\{[4\text{-BMes}_2\text{-}3,5\text{-(CH}_3)_2\text{Pz}]\text{Cu}\}_3$  (**6**) in CDCl<sub>3</sub>

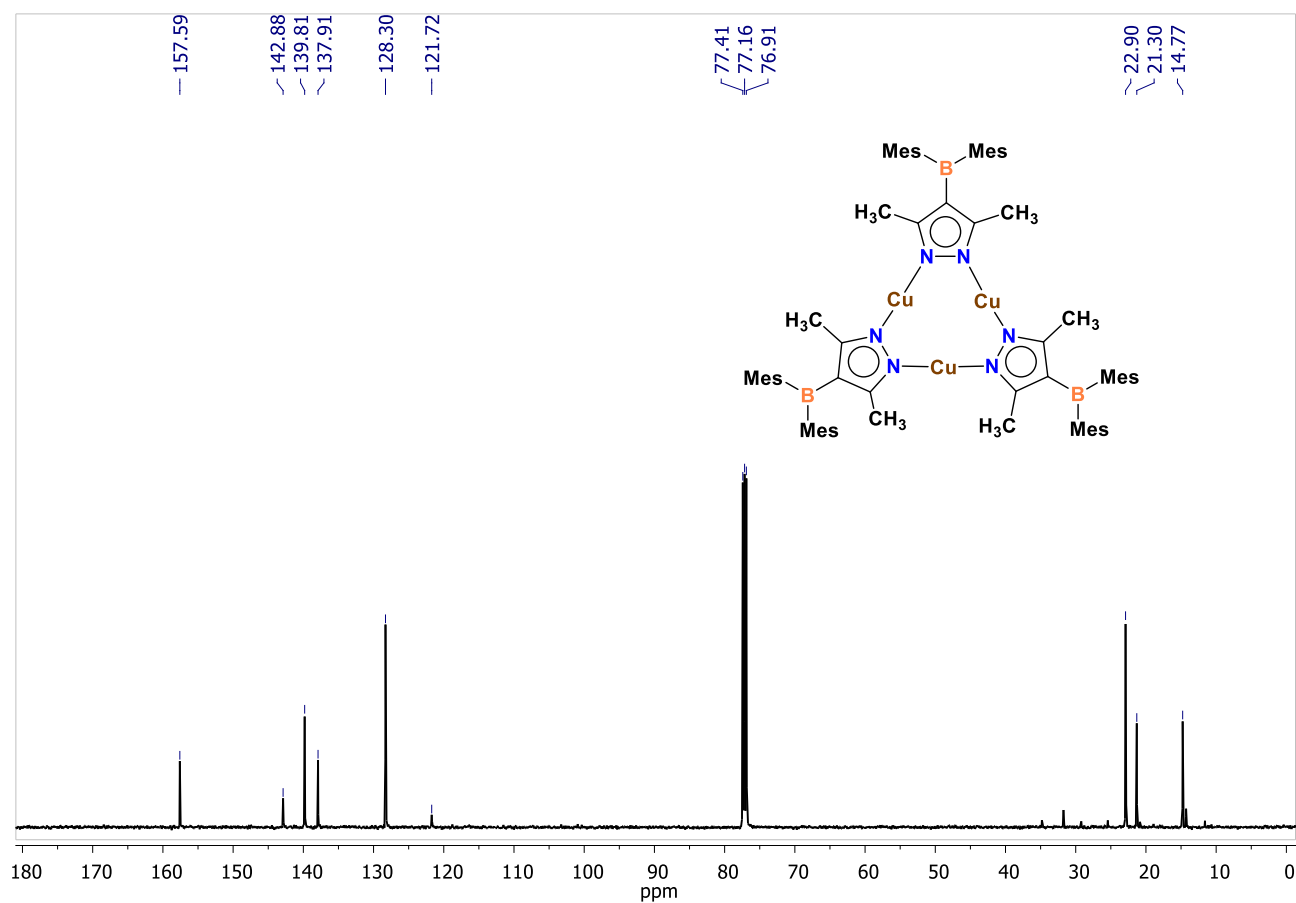

**Figure S10.**  $^{13}\text{C}$  NMR spectrum of  $\{[4\text{-BMes}_2\text{-}3,5\text{-(CH}_3)_2\text{Pz}]\text{Cu}\}_3$  (6) in  $\text{CDCl}_3$



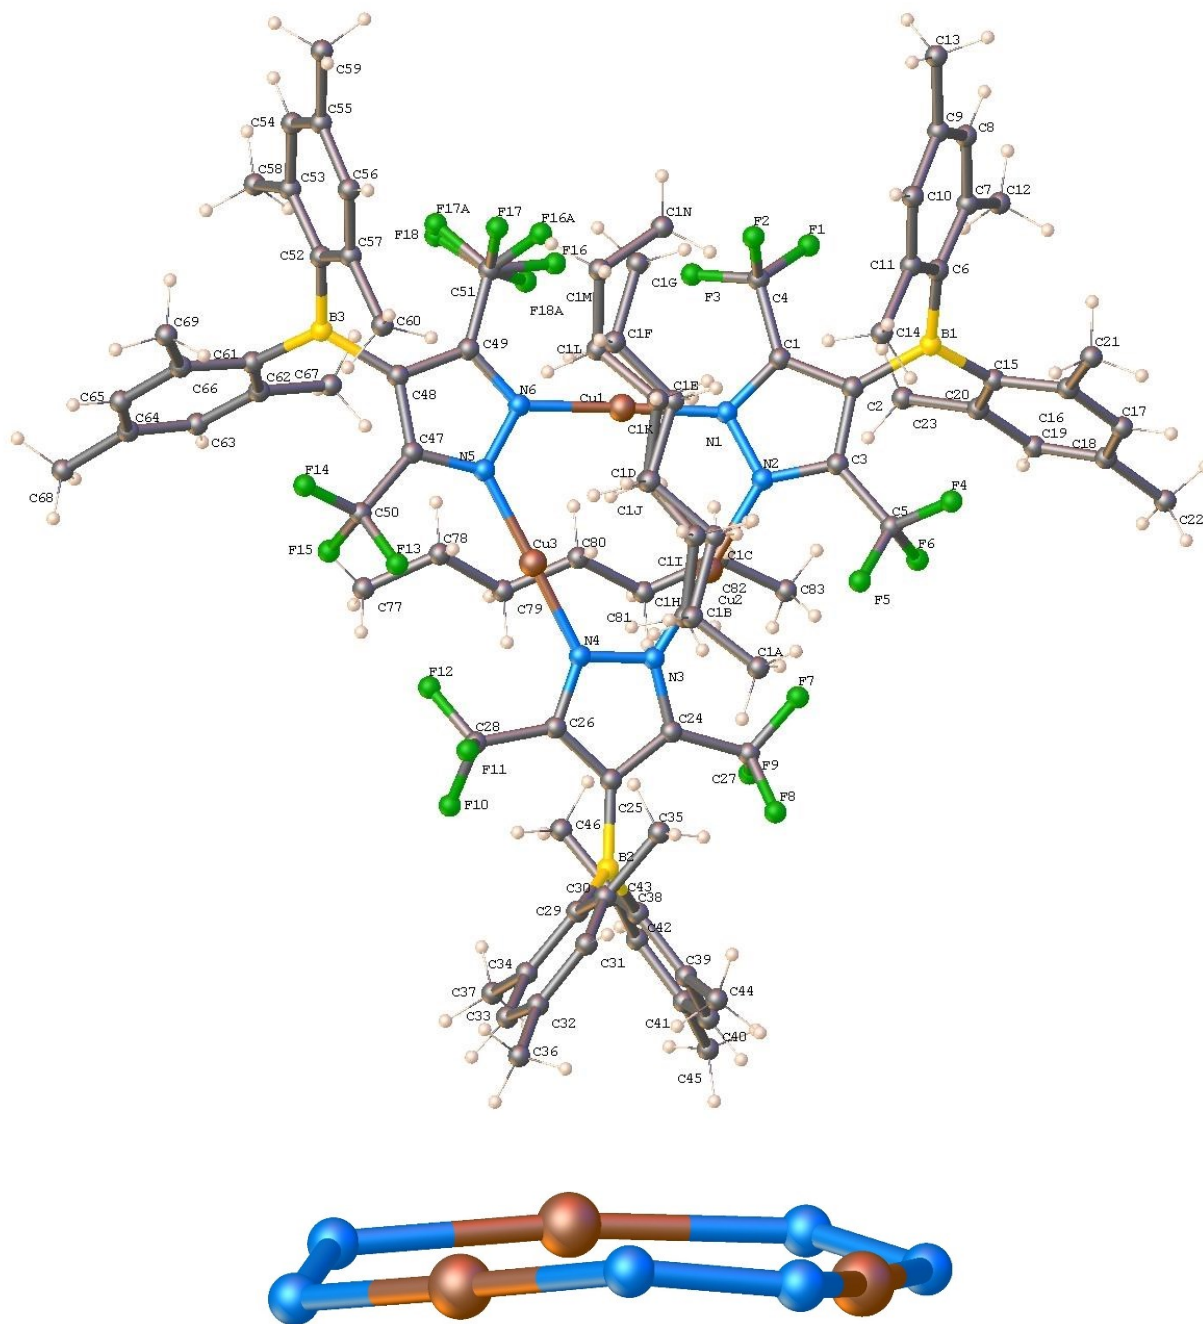

**Figure S12.** Labelling scheme of  $\{[4\text{-}(\text{BMe}_2)\text{-}3,5\text{-}(\text{CF}_3)_2\text{Pz}]\text{Cu}\}_3 \cdot 1.5(\text{heptane})$  (top-figure) and  $\text{Cu}_3\text{N}_6$  core (bottom figure)

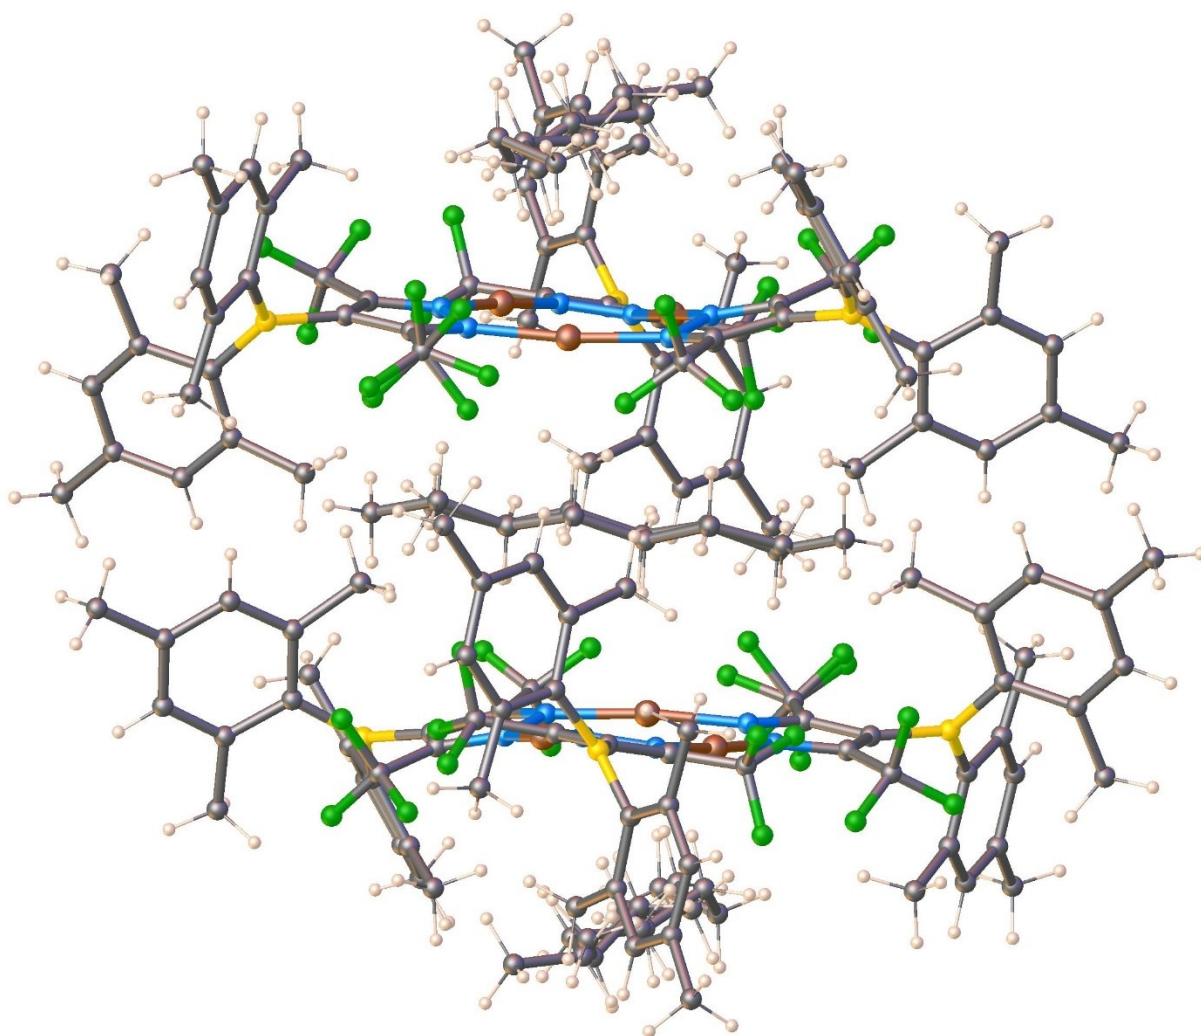

**Figure S13.** Packing diagram of **5** showing the pockets created by Mes<sub>2</sub>B<sup>-</sup> units and heptane molecules

**Table S1.** Crystal data and structure refinement for  $\{[4-(\text{BMes}_2)\text{-}3,5\text{-(CF}_3)_2\text{Pz}]\text{Cu}\}_3 \cdot 1.5(\text{heptane})$  (**5**).

|                                               |                                                                            |
|-----------------------------------------------|----------------------------------------------------------------------------|
| Identification code                           | HRD85                                                                      |
| Empirical formula                             | $\text{C}_{79.5}\text{H}_{90}\text{B}_3\text{Cu}_3\text{F}_{18}\text{N}_6$ |
| Formula weight                                | 1694.62                                                                    |
| Temperature/K                                 | 100.00                                                                     |
| Crystal system                                | triclinic                                                                  |
| Space group                                   | P-1                                                                        |
| $a/\text{\AA}$                                | 16.9215(7)                                                                 |
| $b/\text{\AA}$                                | 16.9436(7)                                                                 |
| $c/\text{\AA}$                                | 17.6659(8)                                                                 |
| $\alpha/^\circ$                               | 72.604(2)                                                                  |
| $\beta/^\circ$                                | 69.820(2)                                                                  |
| $\gamma/^\circ$                               | 60.055(2)                                                                  |
| Volume/ $\text{\AA}^3$                        | 4069.1(3)                                                                  |
| Z                                             | 2                                                                          |
| $\rho_{\text{calc}}/\text{g/cm}^3$            | 1.383                                                                      |
| $\mu/\text{mm}^{-1}$                          | 0.864                                                                      |
| F(000)                                        | 1746.0                                                                     |
| Crystal size/ $\text{mm}^3$                   | $0.2 \times 0.19 \times 0.03$                                              |
| Radiation                                     | Mo $\text{K}\alpha$ ( $\lambda = 0.71073$ )                                |
| $2\Theta$ range for data collection/ $^\circ$ | 5.118 to 61.064                                                            |
| Index ranges                                  | $-24 \leq h \leq 24, -24 \leq k \leq 24, -25 \leq l \leq 25$               |
| Reflections collected                         | 68277                                                                      |
| Independent reflections                       | 24572 [ $R_{\text{int}} = 0.0269, R_{\text{sigma}} = 0.0364$ ]             |
| Data/restraints/parameters                    | 24572/441/1134                                                             |



Goodness-of-fit on  $F^2$                     1.014  
 Final R indexes [ $I \geq 2\sigma(I)$ ]     $R_1 = 0.0436$ ,  $wR_2 = 0.1014$   
 Final R indexes [all data]             $R_1 = 0.0617$ ,  $wR_2 = 0.1093$   
 Largest diff. peak/hole /  $e \text{ \AA}^{-3}$  0.87/-0.71

**Table S2.** Bond Lengths for  $\{[4\text{-(BMes}_2\text{)-3,5-(CF}_3\text{)}_2\text{Pz]Cu}\}_3 \cdot 1.5(\text{heptane})$ .

| Atom | Atom | Length/Å   | Atom | Atom | Length/Å |
|------|------|------------|------|------|----------|
| Cu1  | N1   | 1.8752(14) | C29  | B2   | 1.566(3) |
| Cu1  | N6   | 1.8748(15) | C30  | C31  | 1.391(3) |
| Cu2  | N2   | 1.8601(15) | C30  | C35  | 1.516(3) |
| Cu2  | N3   | 1.8613(16) | C31  | C32  | 1.389(3) |
| Cu3  | N4   | 1.8663(15) | C32  | C33  | 1.389(3) |
| Cu3  | N5   | 1.8645(14) | C32  | C36  | 1.512(3) |
| F1   | C4   | 1.339(2)   | C33  | C34  | 1.394(3) |
| F2   | C4   | 1.333(2)   | C34  | C37  | 1.510(3) |
| F3   | C4   | 1.334(2)   | C38  | C39  | 1.420(2) |
| F4   | C5   | 1.338(2)   | C38  | C43  | 1.411(3) |
| F5   | C5   | 1.341(2)   | C38  | B2   | 1.564(3) |
| F6   | C5   | 1.334(2)   | C39  | C40  | 1.391(2) |
| F7   | C27  | 1.330(2)   | C39  | C44  | 1.514(3) |
| F8   | C27  | 1.338(3)   | C40  | C41  | 1.388(3) |
| F9   | C27  | 1.331(3)   | C41  | C42  | 1.389(3) |
| F10  | C28  | 1.332(2)   | C41  | C45  | 1.507(3) |
| F11  | C28  | 1.320(3)   | C42  | C43  | 1.390(3) |
| F12  | C28  | 1.336(2)   | C43  | C46  | 1.523(3) |
| F13  | C50  | 1.343(2)   | C47  | C48  | 1.393(2) |

| Atom | Atom | Length/Å | Atom | Atom | Length/Å |
|------|------|----------|------|------|----------|
| F14  | C50  | 1.336(2) | C47  | C50  | 1.490(2) |
| F15  | C50  | 1.335(3) | C48  | C49  | 1.401(2) |
| F16  | C51  | 1.323(2) | C48  | B3   | 1.581(2) |
| F17  | C51  | 1.364(2) | C49  | C51  | 1.492(3) |
| F18  | C51  | 1.333(2) | C51  | F16A | 1.308(6) |
| N1   | N2   | 1.368(2) | C51  | F18A | 1.381(6) |
| N1   | C1   | 1.345(2) | C51  | F17A | 1.343(6) |
| N2   | C3   | 1.350(2) | C52  | C53  | 1.422(2) |
| N3   | N4   | 1.360(2) | C52  | C57  | 1.408(3) |
| N3   | C24  | 1.351(2) | C52  | B3   | 1.571(3) |
| N4   | C26  | 1.344(2) | C53  | C54  | 1.393(3) |
| N5   | N6   | 1.362(2) | C53  | C58  | 1.509(3) |
| N5   | C47  | 1.352(2) | C54  | C55  | 1.383(3) |
| N6   | C49  | 1.348(2) | C55  | C56  | 1.391(3) |
| C1   | C2   | 1.400(2) | C55  | C59  | 1.515(3) |
| C1   | C4   | 1.491(2) | C56  | C57  | 1.390(3) |
| C2   | C3   | 1.399(2) | C57  | C60  | 1.516(3) |
| C2   | B1   | 1.577(3) | C61  | C62  | 1.418(3) |
| C3   | C5   | 1.496(2) | C61  | C66  | 1.425(2) |
| C6   | C7   | 1.419(3) | C61  | B3   | 1.560(3) |
| C6   | C11  | 1.413(2) | C62  | C63  | 1.394(3) |
| C6   | B1   | 1.569(3) | C62  | C67  | 1.516(3) |
| C7   | C8   | 1.393(3) | C63  | C64  | 1.385(3) |
| C7   | C12  | 1.510(3) | C64  | C65  | 1.386(3) |
| C8   | C9   | 1.383(3) | C64  | C68  | 1.508(3) |
| C9   | C10  | 1.389(3) | C65  | C66  | 1.393(3) |

| Atom | Atom | Length/Å | Atom | Atom | Length/Å  |
|------|------|----------|------|------|-----------|
| C9   | C13  | 1.512(3) | C66  | C69  | 1.515(3)  |
| C10  | C11  | 1.393(3) | C77  | C78  | 1.481(9)  |
| C11  | C14  | 1.516(3) | C78  | C79  | 1.460(9)  |
| C15  | C16  | 1.420(2) | C79  | C80  | 1.453(9)  |
| C15  | C20  | 1.414(2) | C80  | C81  | 1.465(7)  |
| C15  | B1   | 1.567(2) | C81  | C82  | 1.453(9)  |
| C16  | C17  | 1.392(2) | C82  | C83  | 1.441(9)  |
| C16  | C21  | 1.508(3) | C1A  | C1B  | 1.473(10) |
| C17  | C18  | 1.386(3) | C1B  | C1C  | 1.508(9)  |
| C18  | C19  | 1.387(3) | C1C  | C1D  | 1.500(8)  |
| C18  | C22  | 1.508(3) | C1D  | C1E  | 1.512(8)  |
| C19  | C20  | 1.398(2) | C1E  | C1F  | 1.482(8)  |
| C20  | C23  | 1.514(3) | C1F  | C1G  | 1.513(8)  |
| C24  | C25  | 1.399(3) | C1H  | C1I  | 1.504(11) |
| C24  | C27  | 1.502(3) | C1I  | C1J  | 1.492(11) |
| C25  | C26  | 1.401(2) | C1J  | C1K  | 1.530(10) |
| C25  | B2   | 1.573(3) | C1K  | C1L  | 1.494(10) |
| C26  | C28  | 1.491(3) | C1L  | C1M  | 1.522(10) |
| C29  | C30  | 1.415(3) | C1M  | C1N  | 1.460(10) |
| C29  | C34  | 1.417(3) |      |      |           |

**Table S3.** Bond Angles for {[4-(BMes<sub>2</sub>)-3,5-(CF<sub>3</sub>)<sub>2</sub>Pz]Cu}<sub>3</sub> (**5**)•1.5(heptane).

| Atom | Atom | Atom | Angle/°   | Atom | Atom | Atom | Angle/°  |
|------|------|------|-----------|------|------|------|----------|
| N6   | Cu1  | N1   | 174.18(7) | C31  | C32  | C36  | 120.7(2) |
| N2   | Cu2  | N3   | 178.99(7) | C33  | C32  | C36  | 121.4(2) |

| Atom | Atom | Atom | Angle/°    | Atom | Atom | Atom | Angle/°    |
|------|------|------|------------|------|------|------|------------|
| N5   | Cu3  | N4   | 176.97(8)  | C32  | C33  | C34  | 121.87(19) |
| N2   | N1   | Cu1  | 118.52(11) | C29  | C34  | C37  | 122.54(17) |
| C1   | N1   | Cu1  | 132.19(12) | C33  | C34  | C29  | 120.13(18) |
| C1   | N1   | N2   | 107.23(13) | C33  | C34  | C37  | 117.33(17) |
| N1   | N2   | Cu2  | 120.44(11) | C39  | C38  | B2   | 120.19(16) |
| C3   | N2   | Cu2  | 132.16(12) | C43  | C38  | C39  | 118.03(16) |
| C3   | N2   | N1   | 107.04(14) | C43  | C38  | B2   | 121.70(16) |
| N4   | N3   | Cu2  | 118.85(12) | C38  | C39  | C44  | 122.91(16) |
| C24  | N3   | Cu2  | 134.05(13) | C40  | C39  | C38  | 119.62(17) |
| C24  | N3   | N4   | 106.83(15) | C40  | C39  | C44  | 117.45(15) |
| N3   | N4   | Cu3  | 119.33(12) | C41  | C40  | C39  | 122.32(16) |
| C26  | N4   | Cu3  | 133.09(12) | C40  | C41  | C42  | 117.82(17) |
| C26  | N4   | N3   | 107.52(14) | C40  | C41  | C45  | 121.00(17) |
| N6   | N5   | Cu3  | 120.78(11) | C42  | C41  | C45  | 121.17(18) |
| C47  | N5   | Cu3  | 131.46(12) | C41  | C42  | C43  | 121.87(18) |
| C47  | N5   | N6   | 107.42(13) | C38  | C43  | C46  | 122.47(17) |
| N5   | N6   | Cu1  | 119.15(11) | C42  | C43  | C38  | 120.29(17) |
| C49  | N6   | Cu1  | 133.52(13) | C42  | C43  | C46  | 117.16(18) |
| C49  | N6   | N5   | 107.10(14) | N5   | C47  | C48  | 111.88(15) |
| N1   | C1   | C2   | 112.35(15) | N5   | C47  | C50  | 119.15(15) |
| N1   | C1   | C4   | 120.27(14) | C48  | C47  | C50  | 128.94(15) |
| C2   | C1   | C4   | 127.34(15) | C47  | C48  | C49  | 101.51(14) |
| C1   | C2   | B1   | 128.72(15) | C47  | C48  | B3   | 130.05(16) |
| C3   | C2   | C1   | 101.13(14) | C49  | C48  | B3   | 128.16(16) |
| C3   | C2   | B1   | 130.13(15) | N6   | C49  | C48  | 112.05(15) |
| N2   | C3   | C2   | 112.23(15) | N6   | C49  | C51  | 120.75(15) |

| Atom | Atom | Atom | Angle/°    | Atom | Atom | Atom | Angle/°    |
|------|------|------|------------|------|------|------|------------|
| N2   | C3   | C5   | 119.44(16) | C48  | C49  | C51  | 127.19(15) |
| C2   | C3   | C5   | 128.28(16) | F13  | C50  | C47  | 111.46(15) |
| F1   | C4   | C1   | 111.51(14) | F14  | C50  | F13  | 106.94(17) |
| F2   | C4   | F1   | 106.86(14) | F14  | C50  | C47  | 111.60(15) |
| F2   | C4   | F3   | 106.96(15) | F15  | C50  | F13  | 106.63(16) |
| F2   | C4   | C1   | 112.75(15) | F15  | C50  | F14  | 107.18(15) |
| F3   | C4   | F1   | 106.56(15) | F15  | C50  | C47  | 112.70(17) |
| F3   | C4   | C1   | 111.82(15) | F16  | C51  | F17  | 105.02(18) |
| F4   | C5   | F5   | 106.89(17) | F16  | C51  | F18  | 109.9(2)   |
| F4   | C5   | C3   | 111.12(15) | F16  | C51  | C49  | 113.37(15) |
| F5   | C5   | C3   | 111.71(15) | F17  | C51  | C49  | 111.21(17) |
| F6   | C5   | F4   | 107.41(15) | F18  | C51  | F17  | 105.58(17) |
| F6   | C5   | F5   | 106.57(15) | F18  | C51  | C49  | 111.3(2)   |
| F6   | C5   | C3   | 112.80(17) | F16A | C51  | C49  | 121.6(6)   |
| C7   | C6   | B1   | 120.33(16) | F16A | C51  | F18A | 101.8(9)   |
| C11  | C6   | C7   | 117.92(16) | F16A | C51  | F17A | 113.3(13)  |
| C11  | C6   | B1   | 121.65(16) | F18A | C51  | C49  | 99.3(6)    |
| C6   | C7   | C12  | 122.35(17) | F17A | C51  | C49  | 118.1(15)  |
| C8   | C7   | C6   | 120.07(18) | F17A | C51  | F18A | 95.3(13)   |
| C8   | C7   | C12  | 117.56(17) | C53  | C52  | B3   | 120.21(17) |
| C9   | C8   | C7   | 121.73(19) | C57  | C52  | C53  | 118.06(17) |
| C8   | C9   | C10  | 118.30(18) | C57  | C52  | B3   | 121.72(16) |
| C8   | C9   | C13  | 120.3(2)   | C52  | C53  | C58  | 122.30(17) |
| C10  | C9   | C13  | 121.4(2)   | C54  | C53  | C52  | 119.58(18) |
| C9   | C10  | C11  | 121.85(19) | C54  | C53  | C58  | 118.12(16) |
| C6   | C11  | C14  | 122.67(17) | C55  | C54  | C53  | 122.16(18) |

| <b>Atom</b> | <b>Atom</b> | <b>Atom</b> | <b>Angle/°</b> | <b>Atom</b> | <b>Atom</b> | <b>Atom</b> | <b>Angle/°</b> |
|-------------|-------------|-------------|----------------|-------------|-------------|-------------|----------------|
| C10         | C11         | C6          | 120.00(18)     | C54         | C55         | C56         | 118.08(18)     |
| C10         | C11         | C14         | 117.30(17)     | C54         | C55         | C59         | 121.1(2)       |
| C16         | C15         | B1          | 120.30(15)     | C56         | C55         | C59         | 120.8(2)       |
| C20         | C15         | C16         | 117.93(15)     | C57         | C56         | C55         | 121.7(2)       |
| C20         | C15         | B1          | 121.65(15)     | C52         | C57         | C60         | 122.66(17)     |
| C15         | C16         | C21         | 121.98(15)     | C56         | C57         | C52         | 120.36(17)     |
| C17         | C16         | C15         | 120.06(16)     | C56         | C57         | C60         | 116.95(18)     |
| C17         | C16         | C21         | 117.95(16)     | C62         | C61         | C66         | 117.51(17)     |
| C18         | C17         | C16         | 121.91(16)     | C62         | C61         | B3          | 122.09(15)     |
| C17         | C18         | C19         | 118.15(16)     | C66         | C61         | B3          | 120.35(16)     |
| C17         | C18         | C22         | 120.49(17)     | C61         | C62         | C67         | 123.07(17)     |
| C19         | C18         | C22         | 121.36(18)     | C63         | C62         | C61         | 120.35(17)     |
| C18         | C19         | C20         | 121.92(17)     | C63         | C62         | C67         | 116.53(18)     |
| C15         | C20         | C23         | 122.93(16)     | C64         | C63         | C62         | 121.82(19)     |
| C19         | C20         | C15         | 119.90(16)     | C63         | C64         | C65         | 118.23(19)     |
| C19         | C20         | C23         | 117.14(16)     | C63         | C64         | C68         | 121.1(2)       |
| N3          | C24         | C25         | 112.50(16)     | C65         | C64         | C68         | 120.64(19)     |
| N3          | C24         | C27         | 119.99(16)     | C64         | C65         | C66         | 122.04(18)     |
| C25         | C24         | C27         | 127.51(16)     | C61         | C66         | C69         | 122.01(17)     |
| C24         | C25         | C26         | 100.75(15)     | C65         | C66         | C61         | 119.96(18)     |
| C24         | C25         | B2          | 129.56(15)     | C65         | C66         | C69         | 118.03(17)     |
| C26         | C25         | B2          | 129.64(16)     | C6          | B1          | C2          | 117.30(15)     |
| N4          | C26         | C25         | 112.36(16)     | C15         | B1          | C2          | 117.06(15)     |
| N4          | C26         | C28         | 119.66(15)     | C15         | B1          | C6          | 125.64(15)     |
| C25         | C26         | C28         | 127.96(16)     | C29         | B2          | C25         | 120.02(16)     |
| F7          | C27         | F8          | 107.37(19)     | C38         | B2          | C25         | 119.62(16)     |

| Atom | Atom | Atom | Angle/°    | Atom | Atom | Atom | Angle/°    |
|------|------|------|------------|------|------|------|------------|
| F7   | C27  | F9   | 107.0(2)   | C38  | B2   | C29  | 120.34(15) |
| F7   | C27  | C24  | 112.11(16) | C52  | B3   | C48  | 118.13(16) |
| F8   | C27  | C24  | 111.07(18) | C61  | B3   | C48  | 116.66(15) |
| F9   | C27  | F8   | 106.66(16) | C61  | B3   | C52  | 125.21(15) |
| F9   | C27  | C24  | 112.35(19) | C79  | C78  | C77  | 119.5(9)   |
| F10  | C28  | F12  | 106.30(17) | C80  | C79  | C78  | 120.6(10)  |
| F10  | C28  | C26  | 111.50(16) | C79  | C80  | C81  | 123.0(10)  |
| F11  | C28  | F10  | 106.98(18) | C82  | C81  | C80  | 120.9(8)   |
| F11  | C28  | F12  | 106.94(18) | C83  | C82  | C81  | 124.4(11)  |
| F11  | C28  | C26  | 112.63(18) | C1A  | C1B  | C1C  | 111.9(9)   |
| F12  | C28  | C26  | 112.10(17) | C1D  | C1C  | C1B  | 115.1(7)   |
| C30  | C29  | C34  | 117.77(17) | C1C  | C1D  | C1E  | 113.5(6)   |
| C30  | C29  | B2   | 121.56(17) | C1F  | C1E  | C1D  | 116.5(6)   |
| C34  | C29  | B2   | 120.29(16) | C1E  | C1F  | C1G  | 115.3(6)   |
| C29  | C30  | C35  | 122.24(18) | C1J  | C1I  | C1H  | 114.8(11)  |
| C31  | C30  | C29  | 120.16(19) | C1I  | C1J  | C1K  | 112.9(10)  |
| C31  | C30  | C35  | 117.52(19) | C1L  | C1K  | C1J  | 111.4(9)   |
| C32  | C31  | C30  | 122.0(2)   | C1K  | C1L  | C1M  | 114.1(9)   |
| C31  | C32  | C33  | 117.9(2)   | C1N  | C1M  | C1L  | 111.0(9)   |

**Crystal Data** for  $C_{79.5}H_{90}B_3Cu_3F_{18}N_6$  ( $M=1694.62$  g/mol): triclinic, space group P-1 (no. 2),  $a = 16.9215(7)$  Å,  $b = 16.9436(7)$  Å,  $c = 17.6659(8)$  Å,  $\alpha = 72.604(2)^\circ$ ,  $\beta = 69.820(2)^\circ$ ,  $\gamma = 60.055(2)^\circ$ ,  $V = 4069.1(3)$  Å<sup>3</sup>,  $Z = 2$ ,  $T = 100.00$  K,  $\mu(\text{Mo K}\alpha) = 0.864$  mm<sup>-1</sup>,  $D_{\text{calc}} = 1.383$  g/cm<sup>3</sup>, 68277 reflections measured ( $5.118^\circ \leq 2\theta \leq 61.064^\circ$ ), 24572 unique ( $R_{\text{int}} = 0.0269$ ,  $R_{\text{sigma}} = 0.0364$ ) which were used in all calculations. The final  $R_1$  was 0.0436 ( $I > 2\sigma(I)$ ) and  $wR_2$  was 0.1093 (all data).

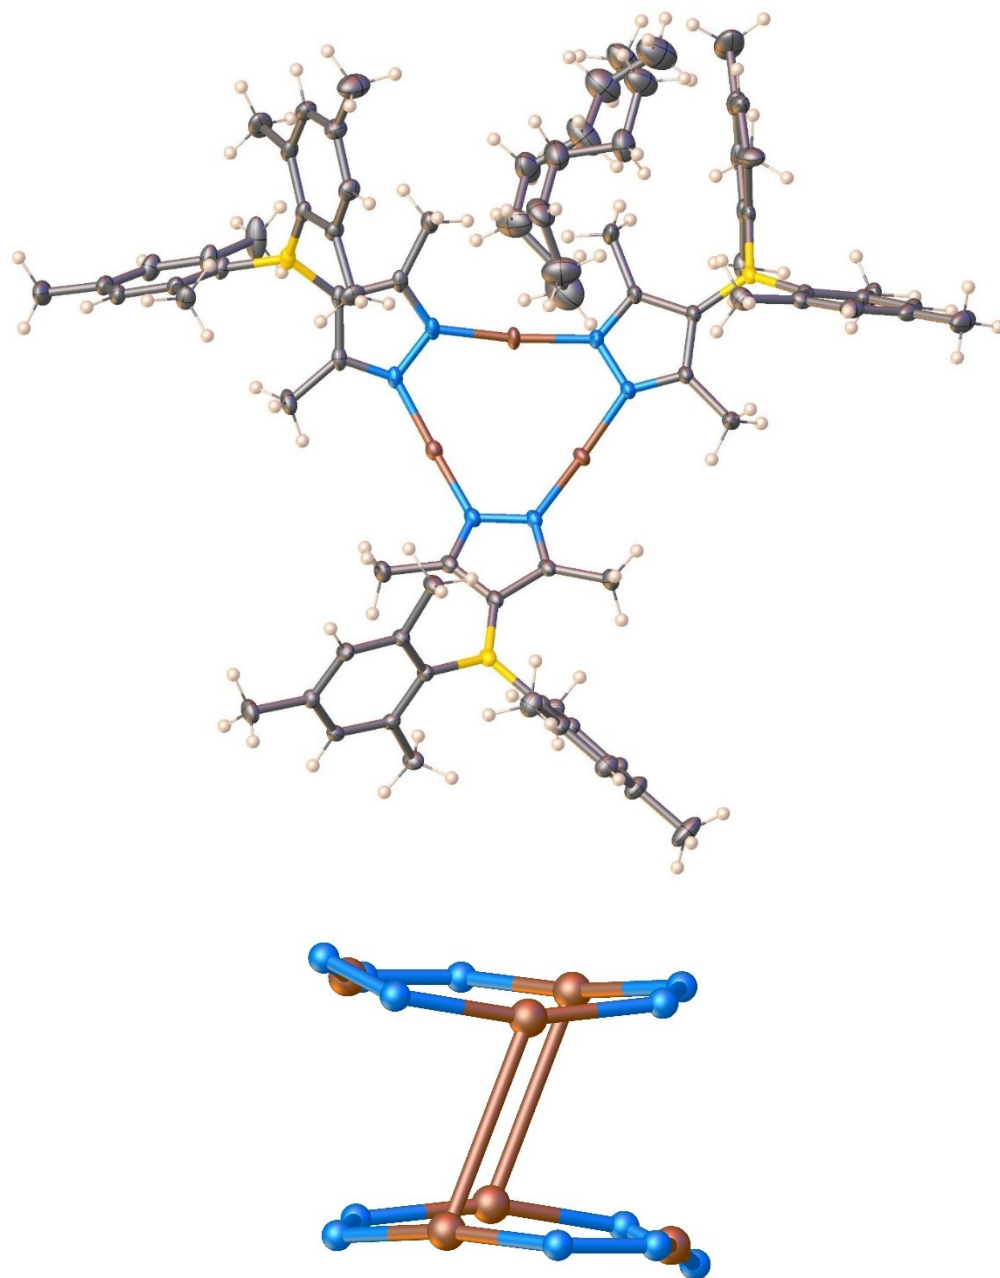

**Figure S14.** Asymmetric unit of  $\{[4\text{-}(\text{BMe}_2)\text{-}3,5\text{-}(\text{CH}_3)_2\text{Pz}]\text{Cu}\}_3$  (**6**)•heptane (top figure) and a view of  $\text{Cu}_3\text{N}_6$  dimer with  $\text{Cu}\cdots\text{Cu}$  contacts (bottom figure)



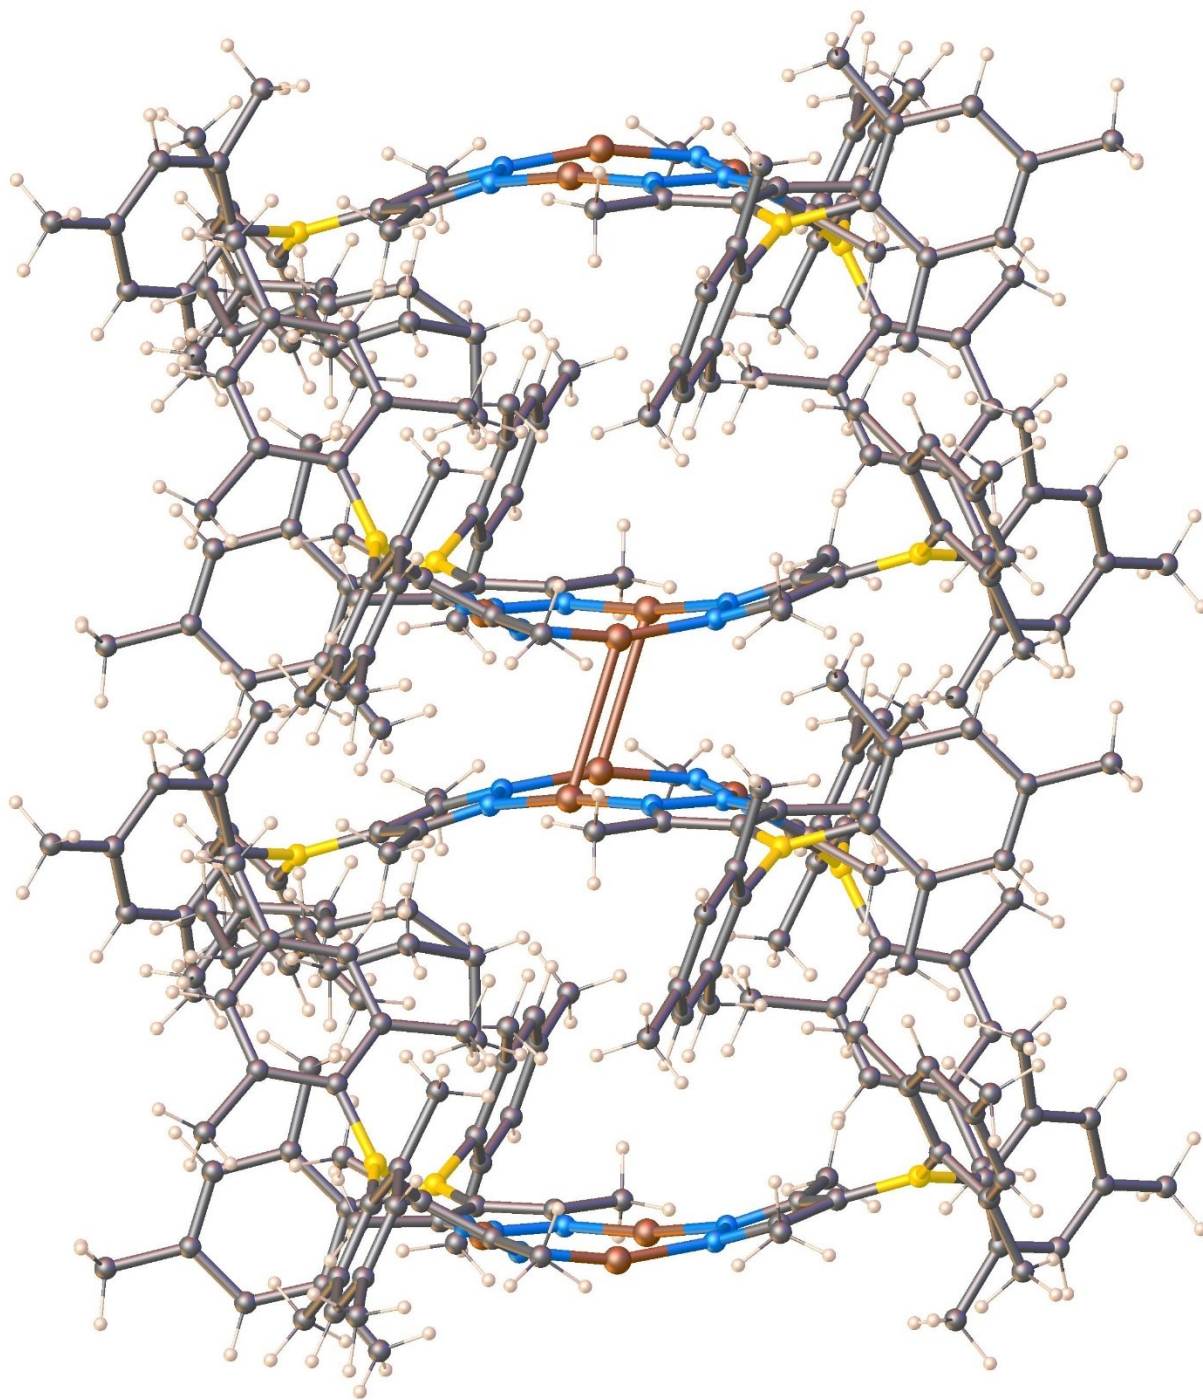

**Figure S15.** Packing diagram showing the pockets created by Mes<sub>2</sub>B- units and heptane molecules

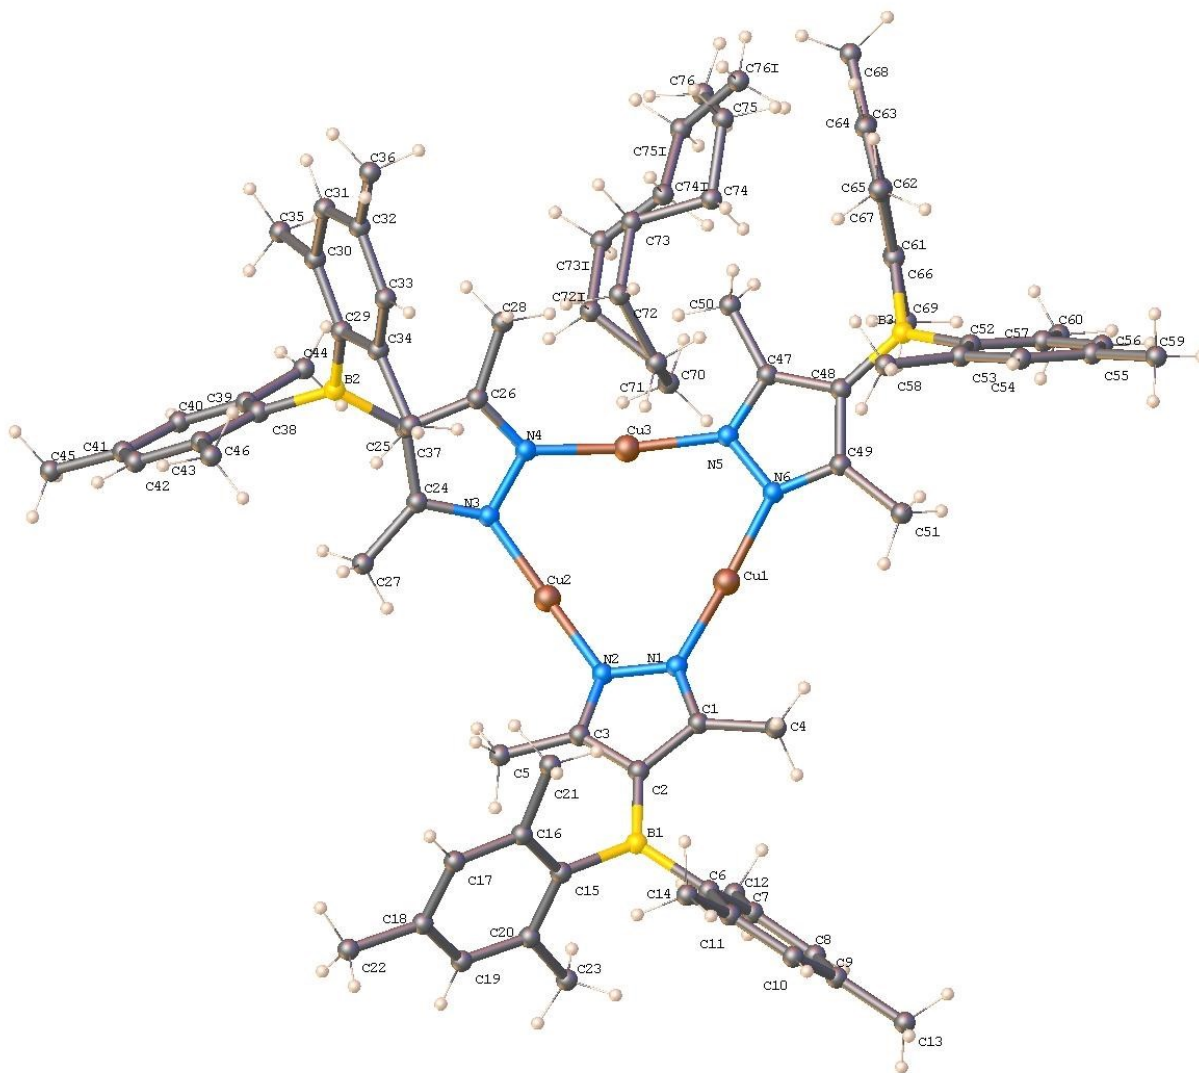

**Figure S16.** Labelling scheme of  $\{[4-(\text{BMe}_2)\text{-}3,5\text{-(CH}_3)_2\text{Pz]Cu}_3\}_3$  (**6**) • heptane

**Table S4.** Crystal data and structure refinement for {[4-(BMes<sub>2</sub>)-3,5-(CH<sub>3</sub>)<sub>2</sub>Pz]Cu}<sub>3</sub> (6) •heptane.

|                                    |                                                                               |
|------------------------------------|-------------------------------------------------------------------------------|
| Identification code                | HRD84                                                                         |
| Empirical formula                  | C <sub>76</sub> H <sub>99</sub> B <sub>3</sub> Cu <sub>3</sub> N <sub>6</sub> |
| Formula weight                     | 1319.66                                                                       |
| Temperature/K                      | 100.00                                                                        |
| Crystal system                     | triclinic                                                                     |
| Space group                        | P-1                                                                           |
| a/Å                                | 13.9999(5)                                                                    |
| b/Å                                | 16.1430(5)                                                                    |
| c/Å                                | 17.2755(6)                                                                    |
| α/°                                | 109.624(2)                                                                    |
| β/°                                | 93.285(2)                                                                     |
| γ/°                                | 105.508(2)                                                                    |
| Volume/Å <sup>3</sup>              | 3496.8(2)                                                                     |
| Z                                  | 2                                                                             |
| ρ <sub>calc</sub> /cm <sup>3</sup> | 1.253                                                                         |
| μ/mm <sup>-1</sup>                 | 0.950                                                                         |
| F(000)                             | 1398.0                                                                        |
| Crystal size/mm <sup>3</sup>       | 0.35 × 0.1 × 0.03                                                             |
| Radiation                          | Mo Kα (λ = 0.71073)                                                           |
| 2θ range for data collection/°     | 4.82 to 61.11                                                                 |
| Index ranges                       | -20 ≤ h ≤ 20, -23 ≤ k ≤ 22, -24 ≤ l ≤ 24                                      |
| Reflections collected              | 56142                                                                         |
| Independent reflections            | 21160 [R <sub>int</sub> = 0.0306, R <sub>sigma</sub> = 0.0390]                |
| Data/restraints/parameters         | 21160/66/865                                                                  |

Goodness-of-fit on  $F^2$                     1.009  
 Final R indexes [ $I \geq 2\sigma(I)$ ]     $R_1 = 0.0441$ ,  $wR_2 = 0.1078$   
 Final R indexes [all data]             $R_1 = 0.0619$ ,  $wR_2 = 0.1161$   
 Largest diff. peak/hole /  $e \text{ \AA}^{-3}$  1.09/-0.82

**Table S5.** Bond Lengths for {[4-(BMes<sub>2</sub>)-3,5-(CH<sub>3</sub>)<sub>2</sub>Pz]Cu}<sub>3</sub> (6) •heptane.

| Atom | Atom             | Length/Å   | Atom | Atom | Length/Å |
|------|------------------|------------|------|------|----------|
| Cu1  | Cu2 <sup>1</sup> | 3.0066(3)  | C31  | C32  | 1.380(3) |
| Cu1  | N1               | 1.8662(16) | C32  | C33  | 1.397(3) |
| Cu1  | N6               | 1.8639(16) | C32  | C36  | 1.510(3) |
| Cu2  | N2               | 1.8632(17) | C33  | C34  | 1.386(3) |
| Cu2  | N3               | 1.8665(17) | C34  | C37  | 1.517(3) |
| Cu3  | N4               | 1.8520(15) | C38  | C39  | 1.408(3) |
| Cu3  | N5               | 1.8575(15) | C38  | C43  | 1.412(3) |
| N1   | N2               | 1.387(2)   | C38  | B2   | 1.586(3) |
| N1   | C1               | 1.333(2)   | C39  | C40  | 1.394(3) |
| N2   | C3               | 1.346(2)   | C39  | C44  | 1.520(3) |
| N3   | N4               | 1.385(2)   | C40  | C41  | 1.387(3) |
| N3   | C24              | 1.342(2)   | C41  | C42  | 1.384(3) |
| N4   | C26              | 1.338(3)   | C41  | C45  | 1.507(3) |
| N5   | N6               | 1.388(2)   | C42  | C43  | 1.397(3) |
| N5   | C47              | 1.333(2)   | C43  | C46  | 1.503(3) |
| N6   | C49              | 1.335(2)   | C47  | C48  | 1.413(2) |
| C1   | C2               | 1.423(2)   | C47  | C50  | 1.496(3) |
| C1   | C4               | 1.495(3)   | C48  | C49  | 1.417(2) |
| C2   | C3               | 1.418(3)   | C48  | B3   | 1.539(3) |

| Atom | Atom | Length/Å | Atom | Atom | Length/Å |
|------|------|----------|------|------|----------|
| C2   | B1   | 1.532(3) | C49  | C51  | 1.496(3) |
| C3   | C5   | 1.498(3) | C52  | C53  | 1.411(3) |
| C6   | C7   | 1.415(3) | C52  | C57  | 1.414(3) |
| C6   | C11  | 1.414(3) | C52  | B3   | 1.582(3) |
| C6   | B1   | 1.594(3) | C53  | C54  | 1.397(3) |
| C7   | C8   | 1.396(3) | C53  | C58  | 1.521(3) |
| C7   | C12  | 1.511(3) | C54  | C55  | 1.391(3) |
| C8   | C9   | 1.388(3) | C55  | C56  | 1.387(3) |
| C9   | C10  | 1.388(3) | C55  | C59  | 1.510(3) |
| C9   | C13  | 1.506(3) | C56  | C57  | 1.395(3) |
| C10  | C11  | 1.392(3) | C57  | C60  | 1.513(3) |
| C11  | C14  | 1.515(3) | C61  | C62  | 1.413(3) |
| C15  | C16  | 1.409(2) | C61  | C66  | 1.406(3) |
| C15  | C20  | 1.414(3) | C61  | B3   | 1.595(3) |
| C15  | B1   | 1.583(3) | C62  | C63  | 1.398(3) |
| C16  | C17  | 1.397(2) | C62  | C67  | 1.506(3) |
| C16  | C21  | 1.515(3) | C63  | C64  | 1.379(4) |
| C17  | C18  | 1.385(3) | C64  | C65  | 1.379(4) |
| C18  | C19  | 1.392(3) | C64  | C68  | 1.520(3) |
| C18  | C22  | 1.507(3) | C65  | C66  | 1.405(3) |
| C19  | C20  | 1.387(2) | C66  | C69  | 1.508(3) |
| C20  | C23  | 1.509(3) | C70  | C71  | 1.485(4) |
| C24  | C25  | 1.409(3) | C71  | C72  | 1.496(4) |
| C24  | C27  | 1.499(3) | C71  | C72I | 1.525(4) |
| C25  | C26  | 1.415(2) | C72  | C73  | 1.509(5) |
| C25  | B2   | 1.540(3) | C73  | C74  | 1.527(4) |

| Atom | Atom | Length/Å | Atom | Atom | Length/Å |
|------|------|----------|------|------|----------|
| C26  | C28  | 1.494(3) | C74  | C75  | 1.513(5) |
| C29  | C30  | 1.412(3) | C75  | C76  | 1.514(5) |
| C29  | C34  | 1.419(3) | C72I | C73I | 1.519(4) |
| C29  | B2   | 1.580(3) | C73I | C74I | 1.511(5) |
| C30  | C31  | 1.393(3) | C74I | C75I | 1.505(5) |
| C30  | C35  | 1.508(3) | C75I | C76I | 1.510(5) |

<sup>1</sup>1-X,1-Y,1-Z

**Table S6.** Bond Angles for {[4-(BMes<sub>2</sub>)-3,5-(CH<sub>3</sub>)<sub>2</sub>Pz]Cu}<sub>3</sub> (**6**) •heptane.

| Atom | Atom | Atom             | Angle/°    | Atom | Atom | Atom | Angle/°    |
|------|------|------------------|------------|------|------|------|------------|
| N1   | Cu1  | Cu2 <sup>1</sup> | 97.48(5)   | C31  | C32  | C33  | 117.2(2)   |
| N6   | Cu1  | Cu2 <sup>1</sup> | 88.59(5)   | C31  | C32  | C36  | 122.2(2)   |
| N6   | Cu1  | N1               | 172.63(7)  | C33  | C32  | C36  | 120.6(2)   |
| N2   | Cu2  | Cu1 <sup>1</sup> | 119.95(5)  | C34  | C33  | C32  | 122.63(19) |
| N2   | Cu2  | N3               | 165.45(7)  | C29  | C34  | C37  | 122.52(18) |
| N3   | Cu2  | Cu1 <sup>1</sup> | 74.35(5)   | C33  | C34  | C29  | 119.91(18) |
| N4   | Cu3  | N5               | 171.62(8)  | C33  | C34  | C37  | 117.58(17) |
| N2   | N1   | Cu1              | 120.44(12) | C39  | C38  | C43  | 117.93(17) |
| C1   | N1   | Cu1              | 130.94(13) | C39  | C38  | B2   | 120.31(17) |
| C1   | N1   | N2               | 108.37(15) | C43  | C38  | B2   | 121.76(17) |
| N1   | N2   | Cu2              | 122.02(12) | C38  | C39  | C44  | 121.70(19) |
| C3   | N2   | Cu2              | 128.73(13) | C40  | C39  | C38  | 120.06(19) |
| C3   | N2   | N1               | 107.81(16) | C40  | C39  | C44  | 118.20(19) |
| N4   | N3   | Cu2              | 113.54(11) | C41  | C40  | C39  | 122.1(2)   |
| C24  | N3   | Cu2              | 133.96(14) | C40  | C41  | C45  | 121.1(2)   |
| C24  | N3   | N4               | 107.54(16) | C42  | C41  | C40  | 117.84(18) |

| Atom | Atom | Atom | Angle/°    | Atom | Atom | Atom | Angle/°    |
|------|------|------|------------|------|------|------|------------|
| N3   | N4   | Cu3  | 119.71(13) | C42  | C41  | C45  | 121.0(2)   |
| C26  | N4   | Cu3  | 131.80(14) | C41  | C42  | C43  | 121.78(18) |
| C26  | N4   | N3   | 108.40(15) | C38  | C43  | C46  | 121.09(17) |
| N6   | N5   | Cu3  | 120.70(12) | C42  | C43  | C38  | 120.24(18) |
| C47  | N5   | Cu3  | 129.84(13) | C42  | C43  | C46  | 118.64(17) |
| C47  | N5   | N6   | 108.55(14) | N5   | C47  | C48  | 110.06(16) |
| N5   | N6   | Cu1  | 115.14(11) | N5   | C47  | C50  | 118.79(16) |
| C49  | N6   | Cu1  | 136.75(13) | C48  | C47  | C50  | 131.06(17) |
| C49  | N6   | N5   | 107.77(15) | C47  | C48  | C49  | 103.29(15) |
| N1   | C1   | C2   | 110.58(17) | C47  | C48  | B3   | 126.71(17) |
| N1   | C1   | C4   | 119.89(17) | C49  | C48  | B3   | 129.85(17) |
| C2   | C1   | C4   | 129.44(18) | N6   | C49  | C48  | 110.30(16) |
| C1   | C2   | B1   | 129.62(17) | N6   | C49  | C51  | 120.16(16) |
| C3   | C2   | C1   | 102.74(16) | C48  | C49  | C51  | 129.52(16) |
| C3   | C2   | B1   | 127.64(16) | C53  | C52  | C57  | 117.55(17) |
| N2   | C3   | C2   | 110.47(16) | C53  | C52  | B3   | 121.33(16) |
| N2   | C3   | C5   | 118.99(17) | C57  | C52  | B3   | 121.02(17) |
| C2   | C3   | C5   | 130.54(17) | C52  | C53  | C58  | 123.18(18) |
| C7   | C6   | B1   | 121.22(17) | C54  | C53  | C52  | 120.27(19) |
| C11  | C6   | C7   | 117.43(17) | C54  | C53  | C58  | 116.54(19) |
| C11  | C6   | B1   | 121.32(16) | C55  | C54  | C53  | 121.8(2)   |
| C6   | C7   | C12  | 122.95(17) | C54  | C55  | C59  | 120.4(2)   |
| C8   | C7   | C6   | 120.38(18) | C56  | C55  | C54  | 118.11(19) |
| C8   | C7   | C12  | 116.65(17) | C56  | C55  | C59  | 121.5(2)   |
| C9   | C8   | C7   | 121.93(19) | C55  | C56  | C57  | 121.48(19) |
| C8   | C9   | C13  | 121.1(2)   | C52  | C57  | C60  | 121.26(17) |

| Atom | Atom | Atom | Angle/°    | Atom | Atom | Atom | Angle/°    |
|------|------|------|------------|------|------|------|------------|
| C10  | C9   | C8   | 117.72(19) | C56  | C57  | C52  | 120.71(19) |
| C10  | C9   | C13  | 121.2(2)   | C56  | C57  | C60  | 117.98(18) |
| C9   | C10  | C11  | 122.0(2)   | C62  | C61  | B3   | 119.97(18) |
| C6   | C11  | C14  | 121.96(17) | C66  | C61  | C62  | 117.61(19) |
| C10  | C11  | C6   | 120.48(18) | C66  | C61  | B3   | 122.25(18) |
| C10  | C11  | C14  | 117.54(19) | C61  | C62  | C67  | 121.33(18) |
| C16  | C15  | C20  | 117.71(16) | C63  | C62  | C61  | 120.4(2)   |
| C16  | C15  | B1   | 121.67(16) | C63  | C62  | C67  | 118.2(2)   |
| C20  | C15  | B1   | 120.61(16) | C64  | C63  | C62  | 121.8(2)   |
| C15  | C16  | C21  | 122.67(16) | C63  | C64  | C68  | 121.1(3)   |
| C17  | C16  | C15  | 120.11(17) | C65  | C64  | C63  | 118.0(2)   |
| C17  | C16  | C21  | 117.22(16) | C65  | C64  | C68  | 120.9(3)   |
| C18  | C17  | C16  | 122.15(17) | C64  | C65  | C66  | 122.0(2)   |
| C17  | C18  | C19  | 117.54(17) | C61  | C66  | C69  | 122.68(19) |
| C17  | C18  | C22  | 121.24(17) | C65  | C66  | C61  | 120.0(2)   |
| C19  | C18  | C22  | 121.21(17) | C65  | C66  | C69  | 117.3(2)   |
| C20  | C19  | C18  | 121.99(17) | C2   | B1   | C6   | 121.35(16) |
| C15  | C20  | C23  | 120.99(16) | C2   | B1   | C15  | 119.30(16) |
| C19  | C20  | C15  | 120.46(16) | C15  | B1   | C6   | 119.31(16) |
| C19  | C20  | C23  | 118.49(16) | C25  | B2   | C29  | 117.11(16) |
| N3   | C24  | C25  | 110.70(17) | C25  | B2   | C38  | 120.13(18) |
| N3   | C24  | C27  | 120.11(19) | C29  | B2   | C38  | 122.72(17) |
| C25  | C24  | C27  | 128.94(17) | C48  | B3   | C52  | 122.09(17) |
| C24  | C25  | C26  | 103.19(16) | C48  | B3   | C61  | 117.29(16) |
| C24  | C25  | B2   | 128.79(17) | C52  | B3   | C61  | 120.47(16) |
| C26  | C25  | B2   | 127.21(19) | C70  | C71  | C72  | 126.4(4)   |



| Atom | Atom | Atom | Angle/°    | Atom | Atom | Atom | Angle/°  |
|------|------|------|------------|------|------|------|----------|
| N4   | C26  | C25  | 110.08(17) | C70  | C71  | C72I | 103.3(4) |
| N4   | C26  | C28  | 120.22(16) | C71  | C72  | C73  | 121.0(5) |
| C25  | C26  | C28  | 129.70(18) | C72  | C73  | C74  | 109.1(5) |
| C30  | C29  | C34  | 117.41(19) | C75  | C74  | C73  | 111.9(5) |
| C30  | C29  | B2   | 122.92(17) | C74  | C75  | C76  | 117.0(5) |
| C34  | C29  | B2   | 119.63(17) | C73I | C72I | C71  | 116.4(4) |
| C29  | C30  | C35  | 121.5(2)   | C74I | C73I | C72I | 112.9(5) |
| C31  | C30  | C29  | 120.67(18) | C75I | C74I | C73I | 114.4(5) |
| C31  | C30  | C35  | 117.73(19) | C74I | C75I | C76I | 111.9(6) |
| C32  | C31  | C30  | 122.16(19) |      |      |      |          |

<sup>1</sup>1-X,1-Y,1-Z

**Crystal Data** for C<sub>76</sub>H<sub>99</sub>B<sub>3</sub>Cu<sub>3</sub>N<sub>6</sub> (*M* = 1319.66 g/mol): triclinic, space group P-1 (no. 2), *a* = 13.9999(5) Å, *b* = 16.1430(5) Å, *c* = 17.2755(6) Å,  $\alpha$  = 109.624(2)°,  $\beta$  = 93.285(2)°,  $\gamma$  = 105.508(2)°, *V* = 3496.8(2) Å<sup>3</sup>, *Z* = 2, *T* = 100.00 K,  $\mu$ (Mo K $\alpha$ ) = 0.950 mm<sup>-1</sup>, *D*<sub>calc</sub> = 1.253 g/cm<sup>3</sup>, 56142 reflections measured (4.82° ≤ 2 $\Theta$  ≤ 61.11°), 21160 unique (*R*<sub>int</sub> = 0.0306, *R*<sub>sigma</sub> = 0.0390) which were used in all calculations. The final *R*<sub>1</sub> was 0.0441 (*I* > 2 $\sigma$ (*I*)) and *wR*<sub>2</sub> was 0.1161 (all data)

### 3. Optical Properties

**Table S7.** Comparison of photophysical properties in CHCl<sub>3</sub> solution and the solid state. The 80 K data in blue.

| Compound | $\lambda_{\text{abs.}}$<br>CHCl <sub>3</sub><br>/nm | $\lambda_{\text{Fl.}}$<br>CHCl <sub>3</sub><br>RT<br>[80 K]<br>/nm [a] | Stokes,<br>RT<br>solution<br>/cm <sup>-1</sup> | $\tau_{\text{Fl.}}$<br>CHCl <sub>3</sub> RT<br>[80 K]<br>/ns [b] | $\lambda_{\text{PLE}}$<br>solid<br>/nm | $\lambda_{\text{Fl.}}$<br>solid<br>RT<br>[80 K]<br>/nm [a] | Stokes,<br>RT<br>powder<br>/cm <sup>-1</sup> | $\tau_{\text{Fl.}}$<br>solid<br>RT<br>[80 K]<br>/ns [b] |
|----------|-----------------------------------------------------|------------------------------------------------------------------------|------------------------------------------------|------------------------------------------------------------------|----------------------------------------|------------------------------------------------------------|----------------------------------------------|---------------------------------------------------------|
| <b>3</b> | 332                                                 | 390<br>[370,<br>424,<br>448]                                           | 4479                                           | 2.39<br>[1.92]                                                   | 361                                    | 378<br>[393,<br>415]                                       | 1245                                         | 2.31<br>[2.45]                                          |
| <b>4</b> | 308                                                 | 393<br>[354,<br>412,<br>431]                                           | 7022                                           | 3.62<br>[2.12]                                                   | 335                                    | 360<br>[366,<br>379,<br>436]                               | 2072                                         | 1.85<br>[2.10]                                          |
| <b>5</b> | 327                                                 | 387<br>[371,<br>424,<br>448]                                           | 4741                                           | 2.09<br>[1.19]                                                   | 359                                    | 384<br>[393,<br>415,<br>429]                               | 1813                                         | 1.39<br>[2.20]                                          |
| <b>6</b> | 314                                                 | 387<br>[374,<br>427,<br>434]                                           | 6007                                           | 0.91<br>[0.58]                                                   | 351                                    | 704<br>[713]                                               | 14285                                        | 16106<br>[38907]                                        |

[a] Excited at 300 nm ; [b] excited with a 35 fs pulses centered at 325 nm and measured using a streak camera (**3**, **4**, **5** and **6**), Fitting error in all cases is less than 2%

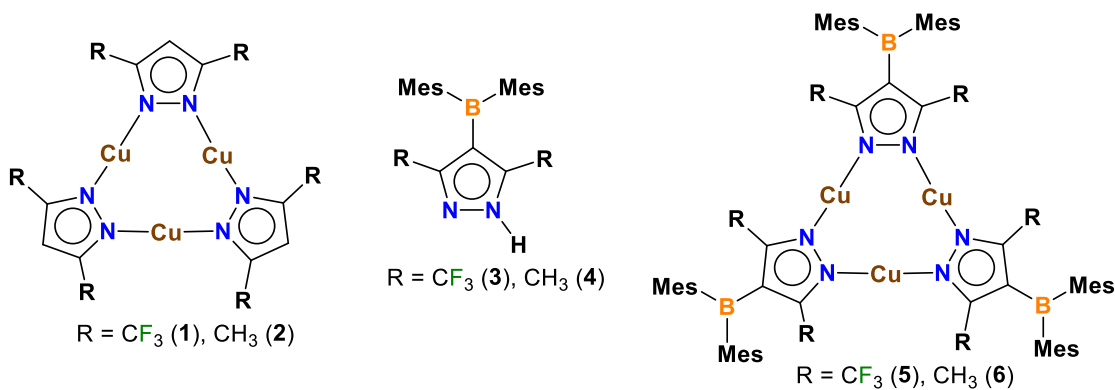

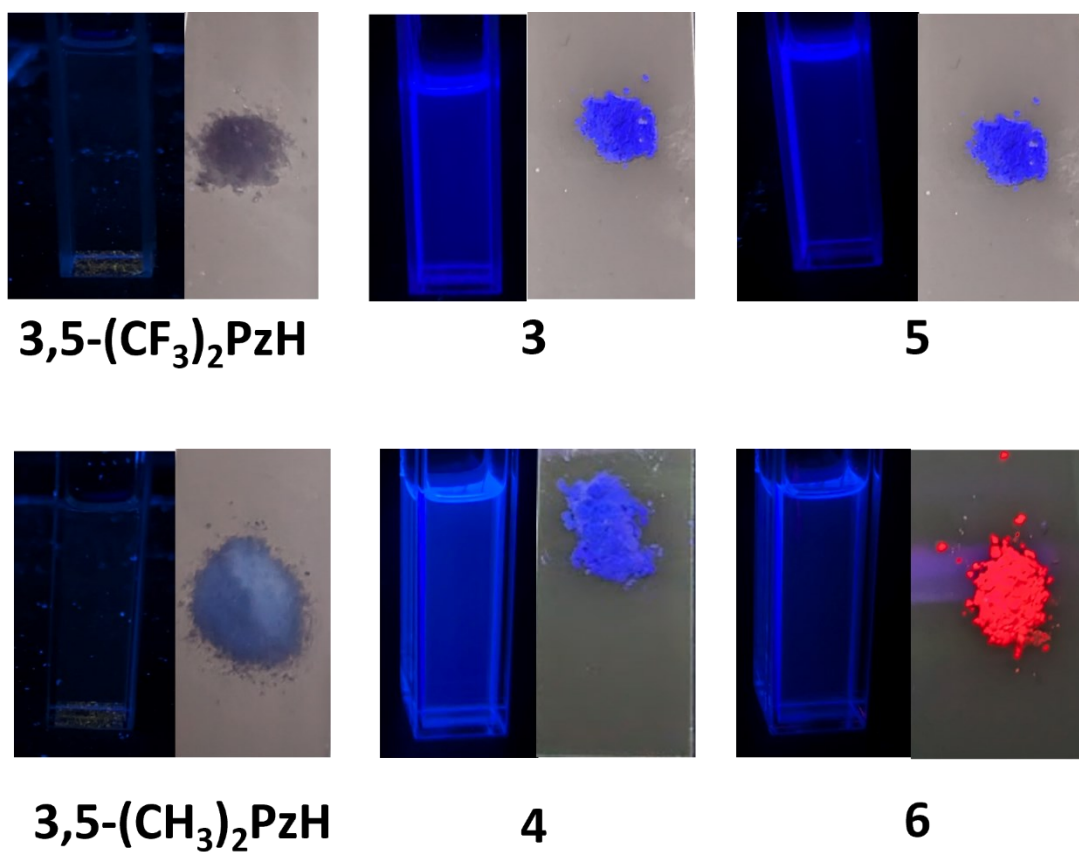

**Figure S17.** The emission photographs of pyrazoles with and without Mes<sub>2</sub>B-substituent and copper complexes **5** and **6** in CHCl<sub>3</sub> solutions and in the solid state at room temperature. Irradiation was performed with a UV lamp (254 nm)

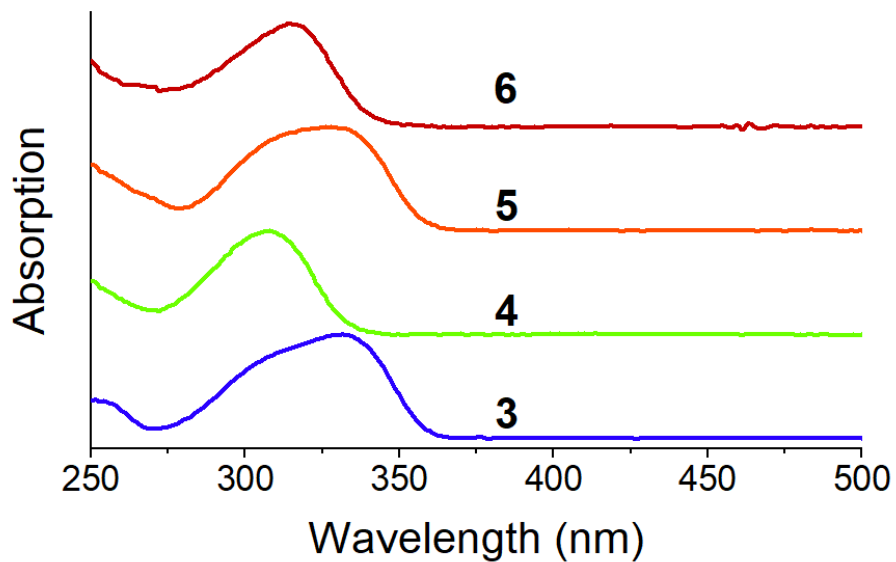

**Figure S18.** Absorption spectra of chloroform solutions at 295 K.

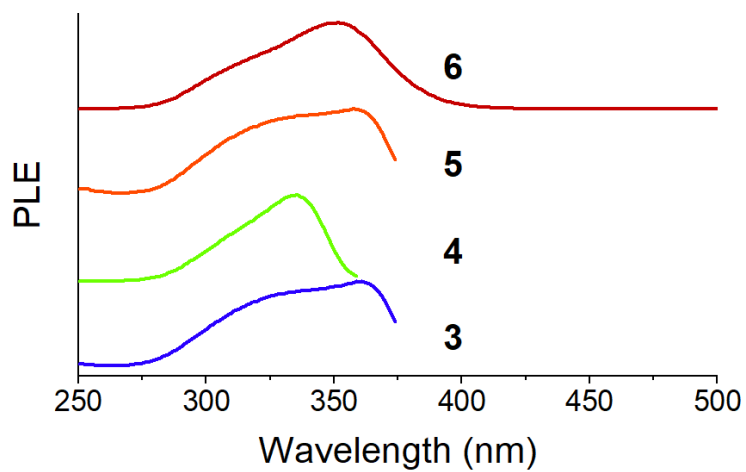

**Figure S19.** 295 K photoluminescence excitation (PLE) spectra of solid powder samples taken at the emission maximum.

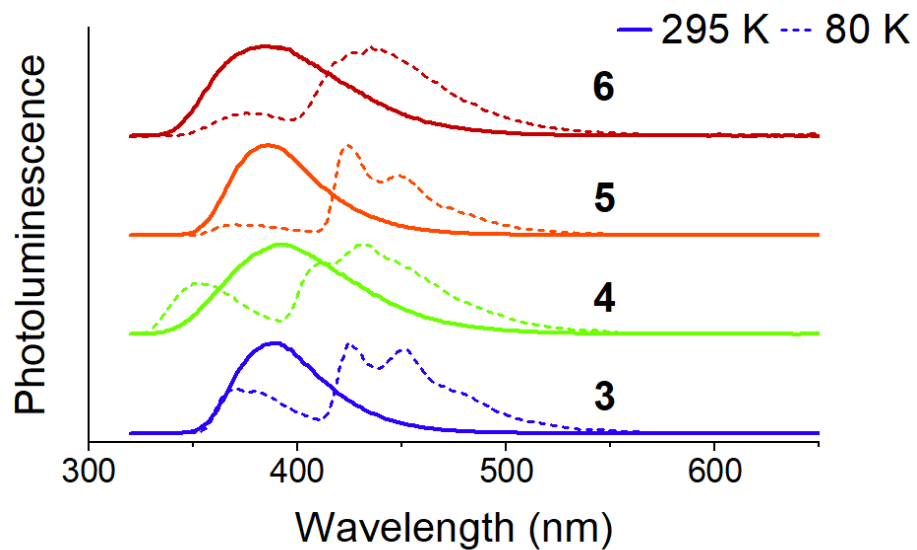

**Figure S20.** Photoluminescence of solutions at 295 K (solid lines) and 80 K (dashed). Excitation at 300 nm.

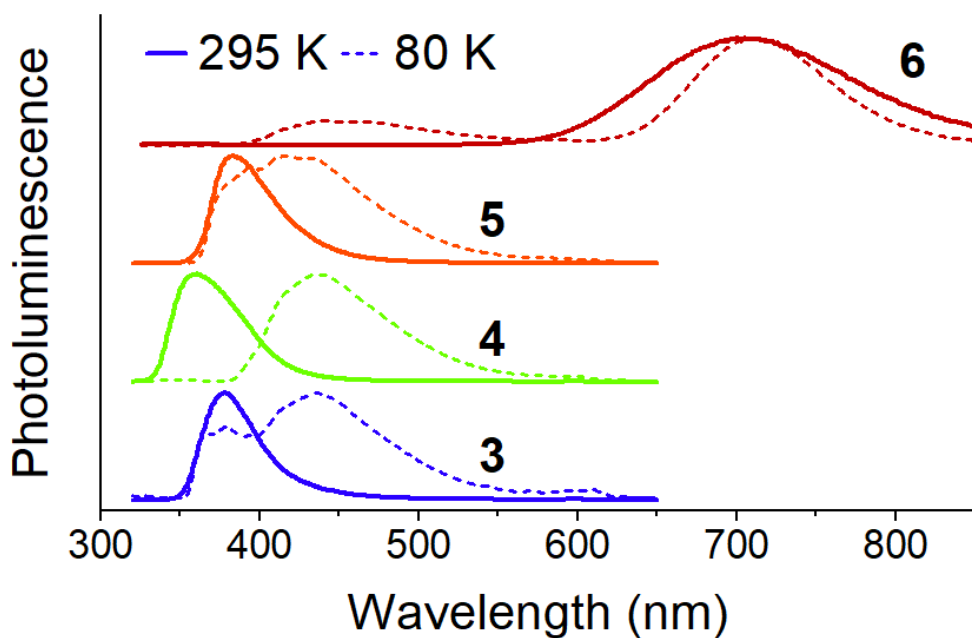

**Figure S21.** Photoluminescence of powders at 295 K (solid lines) and 80 K (dashed lines). Excitation at 300 nm.

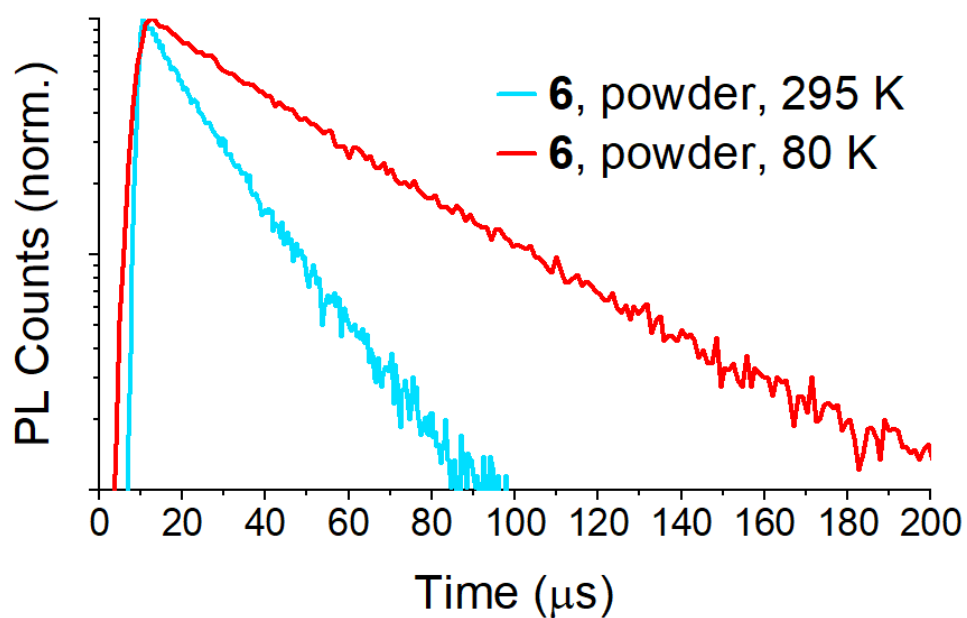

**Figure S22.** Photoluminescence lifetime of **6** powder sample at 295 K (blue) and 80 K (red).

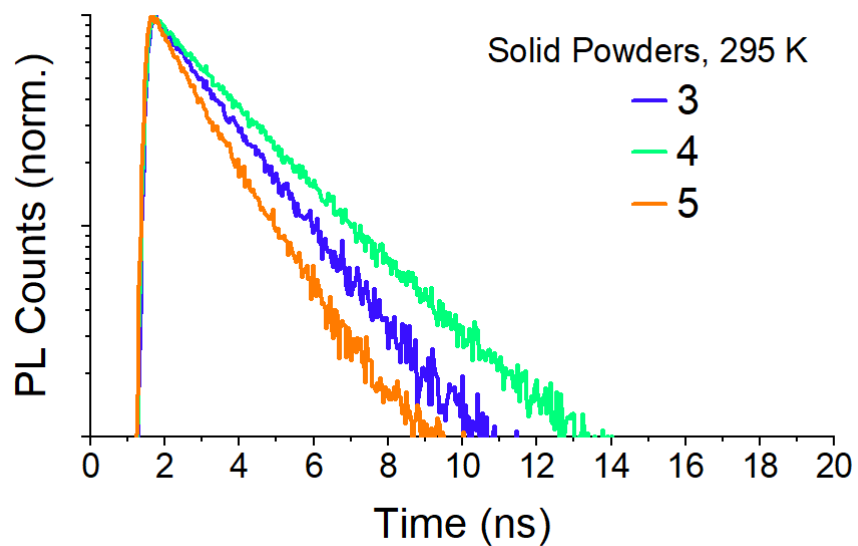

**Figure S23.** 295 K time-resolved photoluminescence of powder samples.

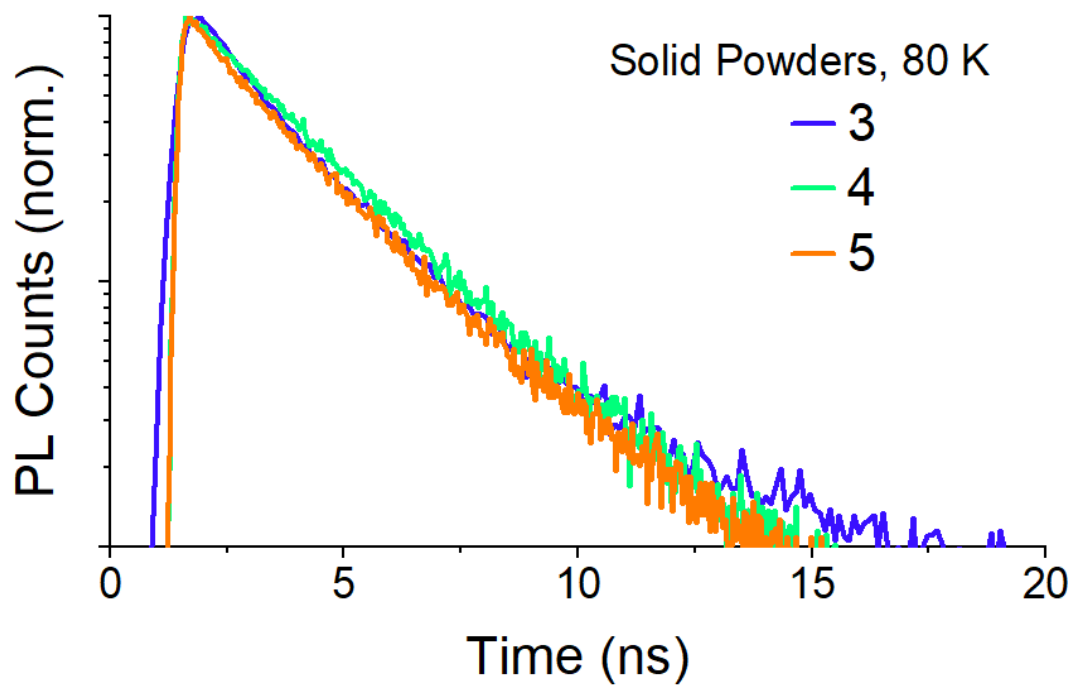

Figure S24. 80 K time-resolved photoluminescence of powder samples

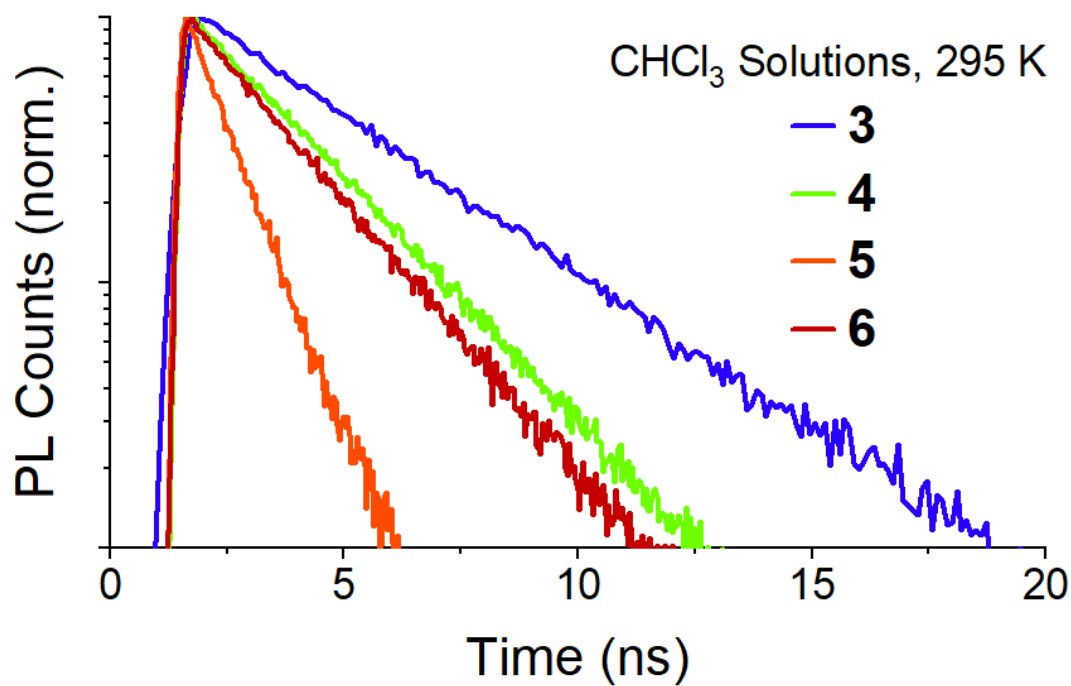

Figure S25. 295K time-resolved photoluminescence of solution samples

## 4. Computational Details

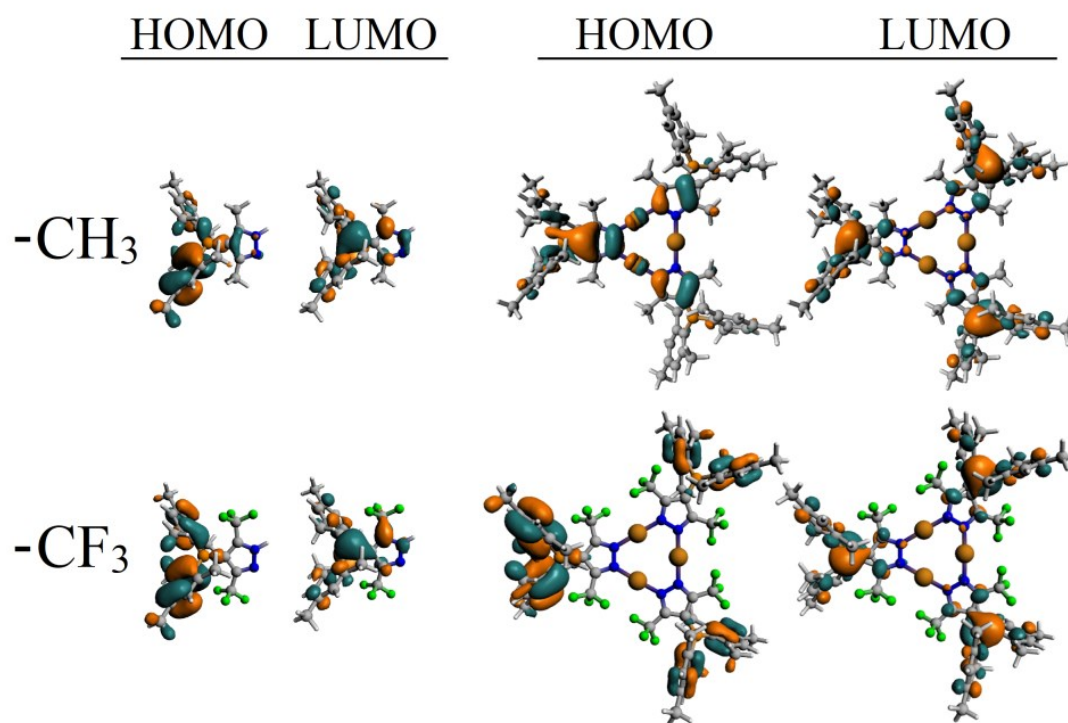

**Figure S26.** HOMO and LUMO isosurfaces, related to the radiative  $T_1 \rightarrow S_0$  decay in both, isolated ligands **4** and **3** and trinuclear copper complexes **6** and **5**.



**Table S8.** HOMO-LUMO gap for the studied species. Values in eV.

|                                                                                               |       |
|-----------------------------------------------------------------------------------------------|-------|
| 4-BMes <sub>2</sub> -3,5-(CH <sub>3</sub> ) <sub>2</sub> PzH ( <b>4</b> )                     | 3.172 |
| 4-BMes <sub>2</sub> -3,5-(CF <sub>3</sub> ) <sub>2</sub> PzH ( <b>3</b> )                     | 2.762 |
|                                                                                               |       |
| {4-BMes <sub>2</sub> -3,5-(CH <sub>3</sub> ) <sub>2</sub> Pz}Cu} <sub>3</sub> ( <b>6</b> )    | 2.876 |
| {4-BMes <sub>2</sub> -3,5-(CF <sub>3</sub> ) <sub>2</sub> Pz}Cu} <sub>3</sub> ( <b>5</b> )    | 2.815 |
|                                                                                               |       |
| [{4-BMes <sub>2</sub> -3,5-(CH <sub>3</sub> ) <sub>2</sub> Pz}Cu} <sub>3</sub> ] <sub>2</sub> | 2.638 |
| [{4-BMes <sub>2</sub> -3,5-(CF <sub>3</sub> ) <sub>2</sub> Pz}Cu} <sub>3</sub> ] <sub>2</sub> | 2.708 |

**Table S9.** Energy decomposition analysis for the {4-BMes<sub>2</sub>-3,5-(CH<sub>3</sub>)<sub>2</sub>Pz}Cu} <sub>3</sub> (**6**) and {4-BMes<sub>2</sub>-3,5-(CF<sub>3</sub>)<sub>2</sub>Pz}Cu} <sub>3</sub> (**5**) interaction leading to the related dimer formation. Values in kcal/mol.

|                            | <b>Dimer of 6</b> |       | <b>Dimer of 5</b> |       |
|----------------------------|-------------------|-------|-------------------|-------|
|                            |                   |       |                   |       |
| $\Delta E_{\text{Pauli}}$  | 66.4              |       | 145.8             |       |
| $\Delta E_{\text{elstat}}$ | -49.0             | 29.6% | -82.3             | 37.0% |
| $\Delta E_{\text{orb}}$    | -33.1             | 20.0% | -42.2             | 19.0% |
| $\Delta E_{\text{disp}}$   | -83.5             | 50.4% | -97.6             | 43.9% |
|                            |                   |       |                   |       |
| $\Delta E_{\text{int}}$    | -99.2             |       | -76.3             |       |

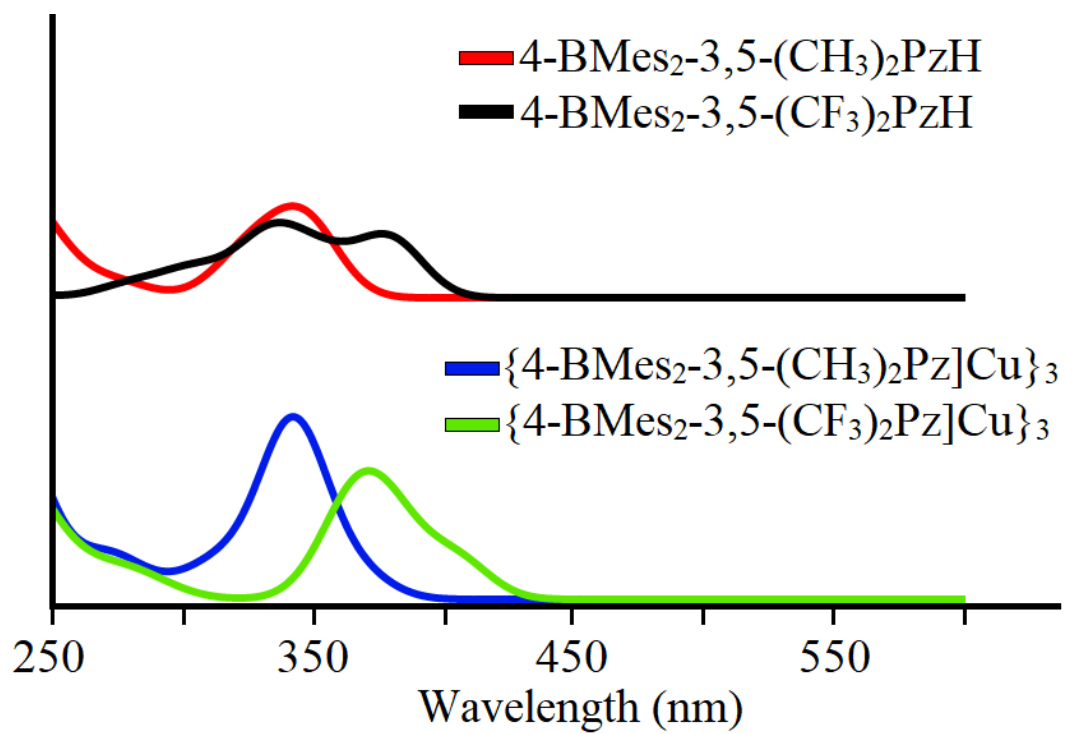

**Figure S27.** Calculated absorption spectrum for isolated ligands and related trinuclear copper complexes

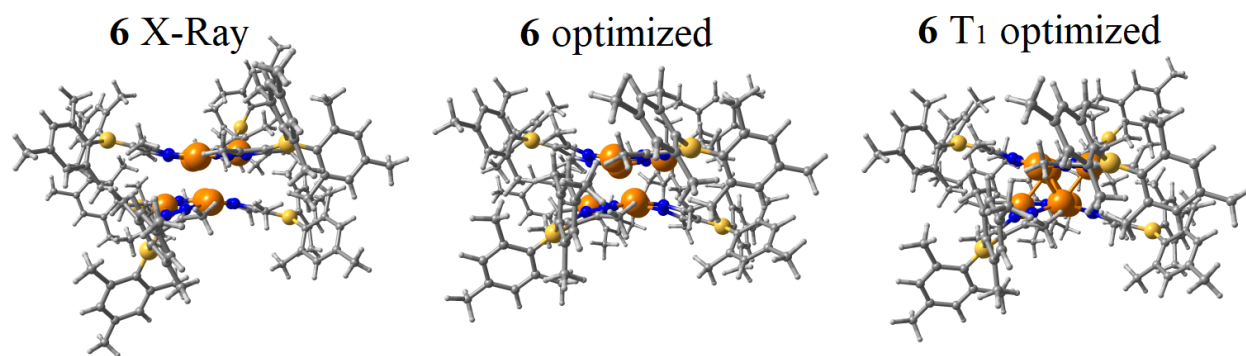

**Figure S28.** Comparison between X-Ray structure and optimized ground and T<sub>1</sub> state for **6**.

**Table S10.** Coordinates for optimized structures, in multiXYZ format. Values in Angstroms.

|            |              |              |               |
|------------|--------------|--------------|---------------|
| 55         |              |              |               |
| CF3-Lig    |              |              |               |
| N          | 6.848005000  | 1.700480000  | -7.881294000  |
| N          | 7.723960000  | 0.857587000  | -7.328941000  |
| C          | 7.612816000  | 2.557615000  | -8.564375000  |
| C          | 9.012051000  | 2.264518000  | -8.482063000  |
| C          | 9.014085000  | 1.133529000  | -7.663133000  |
| C          | 6.929211000  | 3.646781000  | -9.343464000  |
| F          | 7.392274000  | 3.686837000  | -10.627678000 |
| F          | 5.591042000  | 3.467492000  | -9.401341000  |
| F          | 7.147034000  | 4.873543000  | -8.805640000  |
| C          | 10.120740000 | 0.288250000  | -7.114723000  |
| F          | 11.135372000 | 1.028777000  | -6.611286000  |
| F          | 9.646678000  | -0.488509000 | -6.082819000  |
| F          | 10.644096000 | -0.560786000 | -8.024955000  |
| C          | 10.290841000 | 4.579980000  | -9.041395000  |
| C          | 10.047086000 | 5.286443000  | -7.833095000  |
| C          | 10.101667000 | 6.679796000  | -7.818580000  |
| H          | 9.937807000  | 7.202852000  | -6.872347000  |
| C          | 10.346814000 | 7.424010000  | -8.976302000  |
| C          | 10.574971000 | 6.725997000  | -10.162902000 |
| H          | 10.766349000 | 7.286297000  | -11.081875000 |
| C          | 10.575314000 | 5.329332000  | -10.213447000 |
| C          | 9.751130000  | 4.584979000  | -6.526460000  |
| H          | 8.698438000  | 4.267293000  | -6.478509000  |
| H          | 10.367958000 | 3.689906000  | -6.375587000  |
| H          | 9.926796000  | 5.260691000  | -5.679092000  |
| C          | 10.348790000 | 8.929375000  | -8.938158000  |
| H          | 11.020289000 | 9.306935000  | -8.153915000  |
| H          | 10.665085000 | 9.356831000  | -9.897752000  |
| H          | 9.342918000  | 9.314500000  | -8.713161000  |
| C          | 10.845371000 | 4.666911000  | -11.544527000 |
| H          | 10.030297000 | 3.989553000  | -11.834629000 |
| H          | 10.952629000 | 5.419407000  | -12.335210000 |
| H          | 11.764300000 | 4.067185000  | -11.514873000 |
| C          | 11.433572000 | 2.167317000  | -9.695353000  |
| C          | 11.220501000 | 1.148739000  | -10.659040000 |
| C          | 12.297349000 | 0.388583000  | -11.129533000 |
| H          | 12.108665000 | -0.384430000 | -11.880880000 |
| C          | 13.597763000 | 0.587069000  | -10.671180000 |
| C          | 13.806519000 | 1.596217000  | -9.724147000  |
| H          | 14.815676000 | 1.763320000  | -9.338130000  |
| C          | 12.768259000 | 2.395333000  | -9.247669000  |
| C          | 9.874417000  | 0.893175000  | -11.293376000 |
| H          | 9.690297000  | -0.184309000 | -11.401583000 |
| H          | 9.044723000  | 1.328929000  | -10.728892000 |
| H          | 9.843246000  | 1.328262000  | -12.304687000 |
| C          | 14.747294000 | -0.237166000 | -11.188814000 |
| H          | 15.463924000 | -0.469447000 | -10.389920000 |
| H          | 14.398777000 | -1.180687000 | -11.627663000 |
| H          | 15.298863000 | 0.308109000  | -11.970364000 |
| C          | 13.108421000 | 3.454559000  | -8.224593000  |
| H          | 14.170844000 | 3.400623000  | -7.955382000  |
| H          | 12.900363000 | 4.463796000  | -8.603241000  |
| H          | 12.523140000 | 3.335622000  | -7.301680000  |
| B          | 10.256606000 | 3.015425000  | -9.096454000  |
| H          | 7.395158000  | 0.118941000  | -6.718155000  |
| 55         |              |              |               |
| CF3-Lig-T1 |              |              |               |
| N          | 6.721513000  | 1.832450000  | -7.988616000  |
| N          | 7.511832000  | 0.871582000  | -7.500575000  |

|   |              |              |               |
|---|--------------|--------------|---------------|
| C | 7.565987000  | 2.683758000  | -8.582187000  |
| C | 8.946648000  | 2.282815000  | -8.501967000  |
| C | 8.837492000  | 1.084015000  | -7.770951000  |
| C | 6.990181000  | 3.868016000  | -9.294790000  |
| F | 7.476817000  | 3.967121000  | -10.567585000 |
| F | 5.640698000  | 3.789083000  | -9.391899000  |
| F | 7.268262000  | 5.050465000  | -8.679537000  |
| C | 9.865947000  | 0.164306000  | -7.224437000  |
| F | 10.926857000 | 0.814047000  | -6.688036000  |
| F | 9.315834000  | -0.611987000 | -6.231256000  |
| F | 10.368884000 | -0.707350000 | -8.149052000  |
| C | 10.371525000 | 4.539633000  | -9.042669000  |
| C | 10.157706000 | 5.258092000  | -7.806988000  |
| C | 10.108403000 | 6.643426000  | -7.818100000  |
| H | 9.889626000  | 7.173622000  | -6.888192000  |
| C | 10.345135000 | 7.384339000  | -8.988896000  |
| C | 10.657695000 | 6.680913000  | -10.169747000 |
| H | 10.857264000 | 7.246933000  | -11.081923000 |
| C | 10.716196000 | 5.293761000  | -10.210861000 |
| C | 9.907322000  | 4.524021000  | -6.521871000  |
| H | 8.892301000  | 4.097054000  | -6.508622000  |
| H | 10.590468000 | 3.672352000  | -6.400599000  |
| H | 10.002211000 | 5.192681000  | -5.658089000  |
| C | 10.263380000 | 8.883040000  | -8.974927000  |
| H | 10.724834000 | 9.304030000  | -8.071254000  |
| H | 10.744478000 | 9.325212000  | -9.855283000  |
| H | 9.210140000  | 9.208102000  | -8.973939000  |
| C | 11.058122000 | 4.612541000  | -11.507153000 |
| H | 10.381107000 | 3.762279000  | -11.678118000 |
| H | 10.976154000 | 5.307178000  | -12.351654000 |
| H | 12.078623000 | 4.201657000  | -11.499462000 |
| C | 11.447805000 | 2.183630000  | -9.642690000  |
| C | 11.232879000 | 1.161954000  | -10.643941000 |
| C | 12.292377000 | 0.358675000  | -11.057690000 |
| H | 12.100562000 | -0.439230000 | -11.779570000 |
| C | 13.599345000 | 0.572451000  | -10.611442000 |
| C | 13.823441000 | 1.641602000  | -9.712826000  |
| H | 14.840349000 | 1.824214000  | -9.360090000  |
| C | 12.799668000 | 2.455844000  | -9.254132000  |
| C | 9.868206000  | 0.907948000  | -11.213093000 |
| H | 9.282607000  | 0.250070000  | -10.548926000 |
| H | 9.285793000  | 1.835105000  | -11.307513000 |
| H | 9.935236000  | 0.413715000  | -12.190039000 |
| C | 14.748496000 | -0.262876000 | -11.095974000 |
| H | 15.346421000 | -0.638079000 | -10.252506000 |
| H | 14.406382000 | -1.121227000 | -11.684289000 |
| H | 15.431952000 | 0.330185000  | -11.724470000 |
| C | 13.139355000 | 3.559028000  | -8.289042000  |
| H | 14.143402000 | 3.420615000  | -7.870244000  |
| H | 13.106041000 | 4.546751000  | -8.769705000  |
| H | 12.417439000 | 3.584198000  | -7.462524000  |
| B | 10.213981000 | 2.969621000  | -9.051823000  |
| H | 7.105209000  | 0.108988000  | -6.972500000  |

55

CF3-Lig-S1

|   |             |             |               |
|---|-------------|-------------|---------------|
| N | 6.753803000 | 1.650042000 | -8.023950000  |
| N | 7.595813000 | 0.721573000 | -7.563038000  |
| C | 7.550488000 | 2.580731000 | -8.564904000  |
| C | 8.953439000 | 2.267570000 | -8.471426000  |
| C | 8.911823000 | 1.030173000 | -7.790897000  |
| C | 6.893364000 | 3.726819000 | -9.263886000  |
| F | 7.241358000 | 3.783130000 | -10.583146000 |
| F | 5.536847000 | 3.659477000 | -9.229526000  |

|   |              |              |               |
|---|--------------|--------------|---------------|
| F | 7.238523000  | 4.937511000  | -8.736265000  |
| C | 9.976414000  | 0.136675000  | -7.271154000  |
| F | 10.981480000 | 0.791731000  | -6.633671000  |
| F | 9.462213000  | -0.769559000 | -6.357882000  |
| F | 10.570786000 | -0.649784000 | -8.220257000  |
| C | 10.265491000 | 4.584766000  | -9.013138000  |
| C | 10.018315000 | 5.363573000  | -7.823607000  |
| C | 10.187420000 | 6.738788000  | -7.852707000  |
| H | 10.025800000 | 7.311882000  | -6.936696000  |
| C | 10.571970000 | 7.432222000  | -9.026413000  |
| C | 10.815373000 | 6.684531000  | -10.188000000 |
| H | 11.105278000 | 7.204822000  | -11.104429000 |
| C | 10.651276000 | 5.305034000  | -10.210743000 |
| C | 9.648447000  | 4.693899000  | -6.530532000  |
| H | 8.594988000  | 4.380110000  | -6.527340000  |
| H | 10.238296000 | 3.778637000  | -6.384847000  |
| H | 9.802778000  | 5.365674000  | -5.677327000  |
| C | 10.696236000 | 8.928901000  | -9.023236000  |
| H | 11.395004000 | 9.268628000  | -8.243135000  |
| H | 11.041872000 | 9.311767000  | -9.990997000  |
| H | 9.725066000  | 9.399246000  | -8.800014000  |
| C | 10.865428000 | 4.549134000  | -11.481924000 |
| H | 9.983571000  | 3.935412000  | -11.720401000 |
| H | 11.083725000 | 5.218807000  | -12.322289000 |
| H | 11.699134000 | 3.832150000  | -11.373896000 |
| C | 11.382599000 | 2.151082000  | -9.601336000  |
| C | 11.198675000 | 1.116244000  | -10.572294000 |
| C | 12.302354000 | 0.449930000  | -11.089795000 |
| H | 12.143986000 | -0.308243000 | -11.863391000 |
| C | 13.620555000 | 0.724976000  | -10.670964000 |
| C | 13.811681000 | 1.735351000  | -9.718049000  |
| H | 14.820647000 | 1.958806000  | -9.368227000  |
| C | 12.738176000 | 2.421836000  | -9.166467000  |
| C | 9.840969000  | 0.771714000  | -11.129127000 |
| H | 9.469284000  | -0.179353000 | -10.715477000 |
| H | 9.103240000  | 1.547426000  | -10.891381000 |
| H | 9.895382000  | 0.658658000  | -12.222877000 |
| C | 14.781839000 | -0.037473000 | -11.238726000 |
| H | 15.563064000 | -0.199379000 | -10.481629000 |
| H | 14.467861000 | -1.012222000 | -11.637672000 |
| H | 15.248298000 | 0.523708000  | -12.067332000 |
| C | 12.977403000 | 3.447260000  | -8.107936000  |
| H | 14.039452000 | 3.525376000  | -7.845143000  |
| H | 12.623451000 | 4.440885000  | -8.444788000  |
| H | 12.390488000 | 3.225883000  | -7.204264000  |
| B | 10.198887000 | 3.023856000  | -9.037492000  |
| H | 7.236483000  | -0.078026000 | -7.058221000  |

55

CH3-Lig

|   |              |              |              |
|---|--------------|--------------|--------------|
| N | 6.829245000  | 1.835854000  | -7.865764000 |
| N | 7.657338000  | 0.783400000  | -7.611815000 |
| C | 7.629076000  | 2.760119000  | -8.395693000 |
| C | 8.992389000  | 2.295550000  | -8.507575000 |
| C | 8.939743000  | 0.987637000  | -7.981922000 |
| C | 7.030428000  | 4.053189000  | -8.849621000 |
| H | 7.171215000  | 4.195277000  | -9.931510000 |
| H | 5.955024000  | 4.051153000  | -8.631735000 |
| H | 7.498767000  | 4.916423000  | -8.358361000 |
| C | 9.976886000  | -0.068854000 | -7.775239000 |
| H | 10.922346000 | 0.368967000  | -7.435670000 |
| H | 9.644572000  | -0.806856000 | -7.031584000 |
| H | 10.197501000 | -0.601145000 | -8.712109000 |
| C | 10.277055000 | 4.601476000  | -9.081062000 |

|   |              |              |               |
|---|--------------|--------------|---------------|
| C | 10.095834000 | 5.357138000  | -7.894561000  |
| C | 10.140995000 | 6.753155000  | -7.937988000  |
| H | 10.025020000 | 7.313098000  | -7.004688000  |
| C | 10.332959000 | 7.451108000  | -9.133397000  |
| C | 10.503574000 | 6.703819000  | -10.299989000 |
| H | 10.659017000 | 7.225282000  | -11.249040000 |
| C | 10.495828000 | 5.305189000  | -10.291730000 |
| C | 9.862734000  | 4.710475000  | -6.545962000  |
| H | 8.785357000  | 4.598348000  | -6.340607000  |
| H | 10.299797000 | 3.707310000  | -6.476137000  |
| H | 10.287890000 | 5.331726000  | -5.744576000  |
| C | 10.363651000 | 8.958491000  | -9.153967000  |
| H | 11.138591000 | 9.347835000  | -8.477279000  |
| H | 10.570080000 | 9.340675000  | -10.162011000 |
| H | 9.403419000  | 9.379997000  | -8.820593000  |
| C | 10.698373000 | 4.581151000  | -11.603137000 |
| H | 9.842767000  | 3.933950000  | -11.846091000 |
| H | 10.824517000 | 5.294230000  | -12.428405000 |
| H | 11.585873000 | 3.934030000  | -11.565807000 |
| C | 11.458764000 | 2.163720000  | -9.583452000  |
| C | 11.298268000 | 1.198203000  | -10.606062000 |
| C | 12.384557000 | 0.417042000  | -11.017853000 |
| H | 12.234014000 | -0.314102000 | -11.817572000 |
| C | 13.647122000 | 0.542598000  | -10.441339000 |
| C | 13.805954000 | 1.500967000  | -9.436490000  |
| H | 14.785440000 | 1.621580000  | -8.965190000  |
| C | 12.752800000 | 2.316312000  | -9.015639000  |
| C | 9.990626000  | 0.992981000  | -11.339302000 |
| H | 9.671214000  | -0.058468000 | -11.288391000 |
| H | 9.179524000  | 1.605808000  | -10.935351000 |
| H | 10.109066000 | 1.236501000  | -12.404453000 |
| C | 14.809738000 | -0.294351000 | -10.912568000 |
| H | 15.507166000 | -0.509904000 | -10.093094000 |
| H | 14.470401000 | -1.247362000 | -11.338325000 |
| H | 15.377689000 | 0.230928000  | -11.695367000 |
| C | 13.025060000 | 3.322157000  | -7.921890000  |
| H | 14.089507000 | 3.326002000  | -7.654502000  |
| H | 12.739588000 | 4.336569000  | -8.230182000  |
| H | 12.452515000 | 3.094693000  | -7.010436000  |
| B | 10.233526000 | 3.021089000  | -9.059050000  |
| H | 7.276190000  | -0.039790000 | -7.162130000  |

55

CH3-Lig-T1

|   |           |           |            |
|---|-----------|-----------|------------|
| N | 6.854418  | 1.782937  | -7.738149  |
| N | 7.710533  | 0.736372  | -7.500869  |
| C | 7.622431  | 2.707912  | -8.318223  |
| C | 9.000259  | 2.291479  | -8.436378  |
| C | 8.987023  | 0.973163  | -7.886625  |
| C | 7.008648  | 3.975799  | -8.806216  |
| H | 7.091238  | 4.061370  | -9.891037  |
| H | 5.953273  | 4.018102  | -8.539000  |
| H | 7.500936  | 4.856271  | -8.393461  |
| C | 10.068333 | -0.029078 | -7.727203  |
| H | 10.991013 | 0.431460  | -7.381889  |
| H | 9.787386  | -0.815678 | -7.028901  |
| H | 10.311441 | -0.506673 | -8.684706  |
| C | 10.318880 | 4.592103  | -9.070370  |
| C | 10.016881 | 5.386647  | -7.892055  |
| C | 9.993941  | 6.767281  | -7.962157  |
| H | 9.758349  | 7.338028  | -7.071036  |
| C | 10.330105 | 7.461112  | -9.144968  |
| C | 10.691212 | 6.693199  | -10.279493 |
| H | 10.940676 | 7.205663  | -11.197801 |

|   |           |           |            |
|---|-----------|-----------|------------|
| C | 10.729170 | 5.311815  | -10.266378 |
| C | 9.707813  | 4.730905  | -6.575380  |
| H | 8.627498  | 4.560007  | -6.441770  |
| H | 10.191291 | 3.756302  | -6.500269  |
| H | 10.042099 | 5.361964  | -5.735012  |
| C | 10.324677 | 8.955606  | -9.181621  |
| H | 10.968519 | 9.382706  | -8.401281  |
| H | 10.672344 | 9.333569  | -10.144331 |
| H | 9.322438  | 9.356867  | -9.007006  |
| C | 11.080389 | 4.580508  | -11.531052 |
| H | 10.263664 | 3.905958  | -11.811017 |
| H | 11.240648 | 5.270784  | -12.354538 |
| H | 11.964420 | 3.957509  | -11.427079 |
| C | 11.414678 | 2.195842  | -9.636844  |
| C | 11.224172 | 1.221194  | -10.656751 |
| C | 12.287065 | 0.409264  | -11.065922 |
| H | 12.120866 | -0.324624 | -11.852762 |
| C | 13.568822 | 0.549266  | -10.523849 |
| C | 13.755911 | 1.531277  | -9.532529  |
| H | 14.729317 | 1.639344  | -9.071612  |
| C | 12.724051 | 2.359675  | -9.097985  |
| C | 9.886957  | 1.018002  | -11.323154 |
| H | 9.533710  | -0.010046 | -11.219212 |
| H | 9.130751  | 1.678882  | -10.906895 |
| H | 9.952195  | 1.218357  | -12.400494 |
| C | 14.713474 | -0.303868 | -10.989241 |
| H | 15.404764 | -0.523514 | -10.167490 |
| H | 14.362775 | -1.254115 | -11.398425 |
| H | 15.296842 | 0.193318  | -11.774346 |
| C | 13.001941 | 3.343585  | -7.985642  |
| H | 14.048264 | 3.333358  | -7.686612  |
| H | 12.741906 | 4.362472  | -8.264072  |
| H | 12.403709 | 3.100107  | -7.099423  |
| B | 10.195293 | 3.034422  | -9.045983  |
| H | 7.367180  | -0.101800 | -7.047747  |

165

Cu3CF3

|    |              |             |              |
|----|--------------|-------------|--------------|
| Cu | -0.954570000 | 1.653363000 | 0.000000000  |
| N  | 1.886412000  | 1.910301000 | -0.071189000 |
| N  | 0.711163000  | 2.588831000 | 0.071189000  |
| C  | 2.887862000  | 2.819586000 | -0.101641000 |
| C  | 2.382118000  | 4.125950000 | 0.000000000  |
| C  | 0.997903000  | 3.910755000 | 0.101641000  |
| C  | 4.430811000  | 5.626185000 | 0.886313000  |
| C  | 4.427074000  | 5.238850000 | 2.248664000  |
| C  | 5.559753000  | 5.452599000 | 3.031000000  |
| H  | 5.537446000  | 5.168041000 | 4.084947000  |
| C  | 6.723710000  | 6.012321000 | 2.503545000  |
| C  | 6.728249000  | 6.373583000 | 1.157635000  |
| H  | 7.635630000  | 6.798986000 | 0.721707000  |
| C  | 5.605228000  | 6.209012000 | 0.348055000  |
| C  | 3.211022000  | 4.644300000 | 2.913038000  |
| H  | 3.038472000  | 3.607306000 | 2.583838000  |
| H  | 2.293921000  | 5.211996000 | 2.690931000  |
| H  | 3.340981000  | 4.633597000 | 4.004029000  |
| C  | 7.926833000  | 6.239186000 | 3.370056000  |
| H  | 7.798186000  | 7.150817000 | 3.970517000  |
| H  | 8.836069000  | 6.359679000 | 2.766119000  |
| H  | 8.077235000  | 5.401092000 | 4.064010000  |
| C  | 5.705525000  | 6.644588000 | -1.091587000 |
| H  | 5.197029000  | 5.952543000 | -1.774131000 |
| H  | 6.759946000  | 6.705523000 | -1.395494000 |
| H  | 5.250785000  | 7.636186000 | -1.242783000 |



|    |               |              |              |
|----|---------------|--------------|--------------|
| C  | 2.657013000   | 6.650287000  | -0.886313000 |
| C  | 2.323440000   | 6.453383000  | -2.248664000 |
| C  | 1.942212000   | 7.541187000  | -3.031000000 |
| H  | 1.706932000   | 7.379589000  | -4.084947000 |
| C  | 1.844968000   | 8.829064000  | -2.503545000 |
| C  | 2.155560000   | 9.013627000  | -1.157635000 |
| H  | 2.070279000   | 10.012142000 | -0.721707000 |
| C  | 2.574548000   | 7.958776000  | -0.348055000 |
| C  | 2.416571000   | 5.102977000  | -2.913038000 |
| H  | 1.604783000   | 4.435047000  | -2.583838000 |
| H  | 3.366760000   | 4.592592000  | -2.690931000 |
| H  | 2.342322000   | 5.210173000  | -4.004029000 |
| C  | 1.439878000   | 9.984431000  | -3.370056000 |
| H  | 1.089610000   | 10.832100000 | -2.766119000 |
| H  | 0.638866000   | 9.695637000  | -4.064010000 |
| H  | 2.293696000   | 10.328836000 | -3.970517000 |
| C  | 2.901620000   | 8.263424000  | 1.091587000  |
| H  | 2.427180000   | 9.207046000  | 1.395494000  |
| H  | 3.987738000   | 8.365406000  | 1.242783000  |
| H  | 2.556539000   | 7.477030000  | 1.774131000  |
| B  | 3.160488000   | 5.474127000  | 0.000000000  |
| Cu | -0.954570000  | -1.653363000 | 0.000000000  |
| N  | -2.597575000  | 0.678530000  | -0.071189000 |
| N  | -2.597575000  | -0.678530000 | 0.071189000  |
| C  | -3.885764000  | 1.091168000  | -0.101641000 |
| C  | -4.764236000  | 0.000000000  | 0.000000000  |
| C  | -3.885764000  | -1.091168000 | 0.101641000  |
| C  | -7.087824000  | 1.024102000  | 0.886313000  |
| C  | -6.750514000  | 1.214534000  | 2.248664000  |
| C  | -7.501965000  | 2.088588000  | 3.031000000  |
| H  | -7.244377000  | 2.211548000  | 4.084947000  |
| C  | -8.568678000  | 2.816743000  | 2.503545000  |
| C  | -8.883810000  | 2.640043000  | 1.157635000  |
| H  | -9.705909000  | 3.213157000  | 0.721707000  |
| C  | -8.179776000  | 1.749764000  | 0.348055000  |
| C  | -5.627593000  | 0.458677000  | 2.913038000  |
| H  | -4.643255000  | 0.827741000  | 2.583838000  |
| H  | -5.660681000  | -0.619404000 | 2.690931000  |
| H  | -5.683303000  | 0.576576000  | 4.004029000  |
| C  | -9.366710000  | 3.745245000  | 3.370056000  |
| H  | -10.091882000 | 3.178019000  | 3.970517000  |
| H  | -9.925678000  | 4.472420000  | 2.766119000  |
| H  | -8.716100000  | 4.294545000  | 4.064010000  |
| C  | -8.607145000  | 1.618836000  | -1.091587000 |
| H  | -7.753567000  | 1.524487000  | -1.774131000 |
| H  | -9.187126000  | 2.501523000  | -1.395494000 |
| H  | -9.238523000  | 0.729220000  | -1.242783000 |
| C  | -7.087824000  | -1.024102000 | -0.886313000 |
| C  | -6.750514000  | -1.214534000 | -2.248664000 |
| C  | -7.501965000  | -2.088588000 | -3.031000000 |
| H  | -7.244377000  | -2.211548000 | -4.084947000 |
| C  | -8.568678000  | -2.816743000 | -2.503545000 |
| C  | -8.883810000  | -2.640043000 | -1.157635000 |
| H  | -9.705909000  | -3.213157000 | -0.721707000 |
| C  | -8.179776000  | -1.749764000 | -0.348055000 |
| C  | -5.627593000  | -0.458677000 | -2.913038000 |
| H  | -4.643255000  | -0.827741000 | -2.583838000 |
| H  | -5.660681000  | 0.619404000  | -2.690931000 |
| H  | -5.683303000  | -0.576576000 | -4.004029000 |
| C  | -9.366710000  | -3.745245000 | -3.370056000 |
| H  | -9.925678000  | -4.472420000 | -2.766119000 |
| H  | -8.716100000  | -4.294545000 | -4.064010000 |
| H  | -10.091882000 | -3.178019000 | -3.970517000 |

|    |              |               |              |
|----|--------------|---------------|--------------|
| C  | -8.607145000 | -1.618836000  | 1.091587000  |
| H  | -9.187126000 | -2.501523000  | 1.395494000  |
| H  | -9.238523000 | -0.729220000  | 1.242783000  |
| H  | -7.753567000 | -1.524487000  | 1.774131000  |
| B  | -6.320977000 | 0.000000000   | 0.000000000  |
| Cu | 1.909140000  | 0.000000000   | 0.000000000  |
| N  | 0.711163000  | -2.588831000  | -0.071189000 |
| N  | 1.886412000  | -1.910301000  | 0.071189000  |
| C  | 0.997903000  | -3.910755000  | -0.101641000 |
| C  | 2.382118000  | -4.125950000  | 0.000000000  |
| C  | 2.887862000  | -2.819586000  | 0.101641000  |
| C  | 2.657013000  | -6.650287000  | 0.886313000  |
| C  | 2.323440000  | -6.453383000  | 2.248664000  |
| C  | 1.942212000  | -7.541187000  | 3.031000000  |
| H  | 1.706932000  | -7.379589000  | 4.084947000  |
| C  | 1.844968000  | -8.829064000  | 2.503545000  |
| C  | 2.155560000  | -9.013627000  | 1.157635000  |
| H  | 2.070279000  | -10.012142000 | 0.721707000  |
| C  | 2.574548000  | -7.958776000  | 0.348055000  |
| C  | 2.416571000  | -5.102977000  | 2.913038000  |
| H  | 1.604783000  | -4.435047000  | 2.583838000  |
| H  | 3.366760000  | -4.592592000  | 2.690931000  |
| H  | 2.342322000  | -5.210173000  | 4.004029000  |
| C  | 1.439878000  | -9.984431000  | 3.370056000  |
| H  | 2.293696000  | -10.328836000 | 3.970517000  |
| H  | 1.089610000  | -10.832100000 | 2.766119000  |
| H  | 0.638866000  | -9.695637000  | 4.064010000  |
| C  | 2.901620000  | -8.263424000  | -1.091587000 |
| H  | 2.556539000  | -7.477030000  | -1.774131000 |
| H  | 2.427180000  | -9.207046000  | -1.395494000 |
| H  | 3.987738000  | -8.365406000  | -1.242783000 |
| C  | 4.430811000  | -5.626185000  | -0.886313000 |
| C  | 4.427074000  | -5.238850000  | -2.248664000 |
| C  | 5.559753000  | -5.452599000  | -3.031000000 |
| H  | 5.537446000  | -5.168041000  | -4.084947000 |
| C  | 6.723710000  | -6.012321000  | -2.503545000 |
| C  | 6.728249000  | -6.373583000  | -1.157635000 |
| H  | 7.635630000  | -6.798986000  | -0.721707000 |
| C  | 5.605228000  | -6.209012000  | -0.348055000 |
| C  | 3.211022000  | -4.644300000  | -2.913038000 |
| H  | 3.038472000  | -3.607306000  | -2.583838000 |
| H  | 2.293921000  | -5.211996000  | -2.690931000 |
| H  | 3.340981000  | -4.633597000  | -4.004029000 |
| C  | 7.926833000  | -6.239186000  | -3.370056000 |
| H  | 8.836069000  | -6.359679000  | -2.766119000 |
| H  | 8.077235000  | -5.401092000  | -4.064010000 |
| H  | 7.798186000  | -7.150817000  | -3.970517000 |
| C  | 5.705525000  | -6.644588000  | 1.091587000  |
| H  | 6.759946000  | -6.705523000  | 1.395494000  |
| H  | 5.250785000  | -7.636186000  | 1.242783000  |
| H  | 5.197029000  | -5.952543000  | 1.774131000  |
| B  | 3.160488000  | -5.474127000  | 0.000000000  |
| C  | 4.308931000  | -2.378325000  | 0.252345000  |
| F  | 5.027335000  | -3.258642000  | 0.992219000  |
| F  | 4.936143000  | -2.236207000  | -0.946199000 |
| F  | 4.383421000  | -1.165959000  | 0.883706000  |
| C  | -0.094776000 | -4.920806000  | -0.252345000 |
| F  | -0.531459000 | -5.392929000  | 0.946199000  |
| F  | -1.181960000 | -4.379134000  | -0.883706000 |
| F  | 0.308399000  | -5.983121000  | -0.992219000 |
| C  | -4.214155000 | -2.542481000  | 0.252345000  |
| F  | -5.335734000 | -2.724479000  | 0.992219000  |
| F  | -4.404684000 | -3.156722000  | -0.946199000 |

|   |              |              |              |
|---|--------------|--------------|--------------|
| F | -3.201461000 | -3.213174000 | 0.883706000  |
| C | -4.214155000 | 2.542481000  | -0.252345000 |
| F | -5.335734000 | 2.724479000  | -0.992219000 |
| F | -4.404684000 | 3.156722000  | 0.946199000  |
| F | -3.201461000 | 3.213174000  | -0.883706000 |
| C | -0.094776000 | 4.920806000  | 0.252345000  |
| F | -0.531459000 | 5.392929000  | -0.946199000 |
| F | -1.181960000 | 4.379134000  | 0.883706000  |
| F | 0.308399000  | 5.983121000  | 0.992219000  |
| C | 4.308931000  | 2.378325000  | -0.252345000 |
| F | 4.383421000  | 1.165959000  | -0.883706000 |
| F | 5.027335000  | 3.258642000  | -0.992219000 |
| F | 4.936143000  | 2.236207000  | 0.946199000  |

165

Cu3CF3-T1

|    |              |              |              |
|----|--------------|--------------|--------------|
| Cu | -0.945634000 | 1.637886000  | 0.000000000  |
| N  | 1.877914000  | 1.899678000  | -0.076573000 |
| N  | 0.706213000  | 2.576160000  | 0.076573000  |
| C  | 2.880283000  | 2.807765000  | -0.117103000 |
| C  | 2.377326000  | 4.117649000  | 0.000000000  |
| C  | 0.991455000  | 3.898281000  | 0.117103000  |
| C  | 4.457187000  | 5.577855000  | 0.843026000  |
| C  | 4.513968000  | 5.120533000  | 2.185199000  |
| C  | 5.683005000  | 5.282672000  | 2.920480000  |
| H  | 5.704607000  | 4.950700000  | 3.961137000  |
| C  | 6.833139000  | 5.866548000  | 2.372348000  |
| C  | 6.779017000  | 6.308561000  | 1.052799000  |
| H  | 7.667514000  | 6.757053000  | 0.603392000  |
| C  | 5.623822000  | 6.179375000  | 0.285209000  |
| C  | 3.318892000  | 4.517086000  | 2.875056000  |
| H  | 3.173996000  | 3.465412000  | 2.581004000  |
| H  | 2.391145000  | 5.051885000  | 2.628550000  |
| H  | 3.451381000  | 4.545980000  | 3.965669000  |
| C  | 8.082445000  | 5.993112000  | 3.189466000  |
| H  | 7.883476000  | 6.527559000  | 4.131045000  |
| H  | 8.865149000  | 6.535559000  | 2.643606000  |
| H  | 8.475247000  | 4.998091000  | 3.452640000  |
| C  | 5.646017000  | 6.664662000  | -1.133768000 |
| H  | 5.258764000  | 5.903571000  | -1.827324000 |
| H  | 6.667754000  | 6.927944000  | -1.441038000 |
| H  | 5.008683000  | 7.557020000  | -1.262857000 |
| C  | 2.601971000  | 6.648965000  | -0.843026000 |
| C  | 2.177528000  | 6.469477000  | -2.185199000 |
| C  | 1.733425000  | 7.562963000  | -2.920480000 |
| H  | 1.435128000  | 7.415684000  | -3.961137000 |
| C  | 1.664010000  | 8.850946000  | -2.372348000 |
| C  | 2.073865000  | 9.025081000  | -1.052799000 |
| H  | 2.018023000  | 10.018788000 | -0.603392000 |
| C  | 2.539585000  | 7.960061000  | -0.285209000 |
| C  | 2.252465000  | 5.132787000  | -2.875056000 |
| H  | 1.414137000  | 4.481467000  | -2.581004000 |
| H  | 3.179488000  | 4.596735000  | -2.628550000 |
| H  | 2.211244000  | 5.261974000  | -3.965669000 |
| C  | 1.148964000  | 9.996159000  | -3.189466000 |
| H  | 1.227386000  | 10.945224000 | -2.643606000 |
| H  | 0.090850000  | 9.838825000  | -3.452640000 |
| H  | 1.711294000  | 10.091070000 | -4.131045000 |
| C  | 2.948758000  | 8.221926000  | 1.133768000  |
| H  | 2.665898000  | 9.238416000  | 1.441038000  |
| H  | 4.040230000  | 8.116156000  | 1.262857000  |
| H  | 2.483261000  | 7.506009000  | 1.827324000  |
| B  | 3.154334000  | 5.463466000  | 0.000000000  |
| Cu | -0.945634000 | -1.637886000 | 0.000000000  |

|    |               |               |              |
|----|---------------|---------------|--------------|
| N  | -2.584126000  | 0.676482000   | -0.076573000 |
| N  | -2.584126000  | -0.676482000  | 0.076573000  |
| C  | -3.871738000  | 1.090515000   | -0.117103000 |
| C  | -4.754651000  | 0.000000000   | 0.000000000  |
| C  | -3.871738000  | -1.090515000  | 0.117103000  |
| C  | -7.059158000  | 1.071109000   | 0.843026000  |
| C  | -6.691496000  | 1.348944000   | 2.185199000  |
| C  | -7.416430000  | 2.280291000   | 2.920480000  |
| H  | -7.139735000  | 2.464984000   | 3.961137000  |
| C  | -8.497149000  | 2.984398000   | 2.372348000  |
| C  | -8.852882000  | 2.716521000   | 1.052799000  |
| H  | -9.685536000  | 3.261735000   | 0.603392000  |
| C  | -8.163407000  | 1.780685000   | 0.285209000  |
| C  | -5.571357000  | 0.615702000   | 2.875056000  |
| H  | -4.588133000  | 1.016055000   | 2.581004000  |
| H  | -5.570633000  | -0.455150000  | 2.628550000  |
| H  | -5.662625000  | 0.715993000   | 3.965669000  |
| C  | -9.231410000  | 4.003047000   | 3.189466000  |
| H  | -9.594770000  | 3.563511000   | 4.131045000  |
| H  | -10.092535000 | 4.409665000   | 2.643606000  |
| H  | -8.566098000  | 4.840734000   | 3.452640000  |
| C  | -8.594776000  | 1.557263000   | -1.133768000 |
| H  | -7.742025000  | 1.602438000   | -1.827324000 |
| H  | -9.333652000  | 2.310472000   | -1.441038000 |
| H  | -9.048913000  | 0.559137000   | -1.262857000 |
| C  | -7.059158000  | -1.071109000  | -0.843026000 |
| C  | -6.691496000  | -1.348944000  | -2.185199000 |
| C  | -7.416430000  | -2.280291000  | -2.920480000 |
| H  | -7.139735000  | -2.464984000  | -3.961137000 |
| C  | -8.497149000  | -2.984398000  | -2.372348000 |
| C  | -8.852882000  | -2.716521000  | -1.052799000 |
| H  | -9.685536000  | -3.261735000  | -0.603392000 |
| C  | -8.163407000  | -1.780685000  | -0.285209000 |
| C  | -5.571357000  | -0.615702000  | -2.875056000 |
| H  | -4.588133000  | -1.016055000  | -2.581004000 |
| H  | -5.570633000  | 0.455150000   | -2.628550000 |
| H  | -5.662625000  | -0.715993000  | -3.965669000 |
| C  | -9.231410000  | -4.003047000  | -3.189466000 |
| H  | -10.092535000 | -4.409665000  | -2.643606000 |
| H  | -8.566098000  | -4.840734000  | -3.452640000 |
| H  | -9.594770000  | -3.563511000  | -4.131045000 |
| C  | -8.594776000  | -1.557263000  | 1.133768000  |
| H  | -9.333652000  | -2.310472000  | 1.441038000  |
| H  | -9.048913000  | -0.559137000  | 1.262857000  |
| H  | -7.742025000  | -1.602438000  | 1.827324000  |
| B  | -6.308667000  | 0.000000000   | 0.000000000  |
| Cu | 1.891268000   | 0.000000000   | 0.000000000  |
| N  | 0.706213000   | -2.576160000  | -0.076573000 |
| N  | 1.877914000   | -1.899678000  | 0.076573000  |
| C  | 0.991455000   | -3.898281000  | -0.117103000 |
| C  | 2.377326000   | -4.117649000  | 0.000000000  |
| C  | 2.880283000   | -2.807765000  | 0.117103000  |
| C  | 2.601971000   | -6.648965000  | 0.843026000  |
| C  | 2.177528000   | -6.469477000  | 2.185199000  |
| C  | 1.733425000   | -7.562963000  | 2.920480000  |
| H  | 1.435128000   | -7.415684000  | 3.961137000  |
| C  | 1.664010000   | -8.850946000  | 2.372348000  |
| C  | 2.073865000   | -9.025081000  | 1.052799000  |
| H  | 2.018023000   | -10.018788000 | 0.603392000  |
| C  | 2.539585000   | -7.960061000  | 0.285209000  |
| C  | 2.252465000   | -5.132787000  | 2.875056000  |
| H  | 1.414137000   | -4.481467000  | 2.581004000  |
| H  | 3.179488000   | -4.596735000  | 2.628550000  |

|   |              |               |              |
|---|--------------|---------------|--------------|
| H | 2.211244000  | -5.261974000  | 3.965669000  |
| C | 1.148964000  | -9.996159000  | 3.189466000  |
| H | 1.711294000  | -10.091070000 | 4.131045000  |
| H | 1.227386000  | -10.945224000 | 2.643606000  |
| H | 0.090850000  | -9.838825000  | 3.452640000  |
| C | 2.948758000  | -8.221926000  | -1.133768000 |
| H | 2.483261000  | -7.506009000  | -1.827324000 |
| H | 2.665898000  | -9.238416000  | -1.441038000 |
| H | 4.040230000  | -8.116156000  | -1.262857000 |
| C | 4.457187000  | -5.577855000  | -0.843026000 |
| C | 4.513968000  | -5.120533000  | -2.185199000 |
| C | 5.683005000  | -5.282672000  | -2.920480000 |
| H | 5.704607000  | -4.950700000  | -3.961137000 |
| C | 6.833139000  | -5.866548000  | -2.372348000 |
| C | 6.779017000  | -6.308561000  | -1.052799000 |
| H | 7.667514000  | -6.757053000  | -0.603392000 |
| C | 5.623822000  | -6.179375000  | -0.285209000 |
| C | 3.318892000  | -4.517086000  | -2.875056000 |
| H | 3.173996000  | -3.465412000  | -2.581004000 |
| H | 2.391145000  | -5.051885000  | -2.628550000 |
| H | 3.451381000  | -4.545980000  | -3.965669000 |
| C | 8.082445000  | -5.993112000  | -3.189466000 |
| H | 8.865149000  | -6.535559000  | -2.643606000 |
| H | 8.475247000  | -4.998091000  | -3.452640000 |
| H | 7.883476000  | -6.527559000  | -4.131045000 |
| C | 5.646017000  | -6.664662000  | 1.133768000  |
| H | 6.667754000  | -6.927944000  | 1.441038000  |
| H | 5.008683000  | -7.557020000  | 1.262857000  |
| H | 5.258764000  | -5.903571000  | 1.827324000  |
| B | 3.154334000  | -5.463466000  | 0.000000000  |
| C | 4.289450000  | -2.351199000  | 0.299882000  |
| F | 5.015425000  | -3.235446000  | 1.029878000  |
| F | 4.936510000  | -2.169394000  | -0.885644000 |
| F | 4.339801000  | -1.150434000  | 0.957968000  |
| C | -0.108527000 | -4.890372000  | -0.299882000 |
| F | -0.589505000 | -5.359840000  | 0.885644000  |
| F | -1.173596000 | -4.333595000  | -0.957968000 |
| F | 0.294266000  | -5.961208000  | -1.029878000 |
| C | -4.180923000 | -2.539173000  | 0.299882000  |
| F | -5.309690000 | -2.725762000  | 1.029878000  |
| F | -4.347005000 | -3.190447000  | -0.885644000 |
| F | -3.166205000 | -3.183161000  | 0.957968000  |
| C | -4.180923000 | 2.539173000   | -0.299882000 |
| F | -5.309690000 | 2.725762000   | -1.029878000 |
| F | -4.347005000 | 3.190447000   | 0.885644000  |
| F | -3.166205000 | 3.183161000   | -0.957968000 |
| C | -0.108527000 | 4.890372000   | 0.299882000  |
| F | -0.589505000 | 5.359840000   | -0.885644000 |
| F | -1.173596000 | 4.333595000   | 0.957968000  |
| F | 0.294266000  | 5.961208000   | 1.029878000  |
| C | 4.289450000  | 2.351199000   | -0.299882000 |
| F | 4.339801000  | 1.150434000   | -0.957968000 |
| F | 5.015425000  | 3.235446000   | -1.029878000 |
| F | 4.936510000  | 2.169394000   | 0.885644000  |

165

Cu<sub>3</sub>CH<sub>3</sub>

|    |              |              |              |
|----|--------------|--------------|--------------|
| Cu | -1.878310000 | 0.000000000  | 0.000000000  |
| N  | -0.688773000 | -2.579510000 | -0.003585000 |
| N  | -1.889535000 | -1.886251000 | 0.003585000  |
| C  | -0.955497000 | -3.893119000 | -0.019864000 |
| C  | -2.361783000 | -4.090727000 | 0.000000000  |
| C  | -2.893792000 | -2.774044000 | 0.019864000  |
| C  | 0.160830000  | -4.875746000 | 0.054370000  |

|    |              |               |              |
|----|--------------|---------------|--------------|
| H  | 0.448096000  | -5.048008000  | 1.105543000  |
| H  | 1.045651000  | -4.494508000  | -0.478584000 |
| H  | -0.122488000 | -5.844951000  | -0.375382000 |
| C  | -2.483213000 | -6.688540000  | -0.643293000 |
| C  | -1.978968000 | -6.660166000  | -1.964466000 |
| C  | -1.440508000 | -7.816551000  | -2.528656000 |
| H  | -1.072493000 | -7.782413000  | -3.557270000 |
| C  | -1.353713000 | -9.012052000  | -1.815233000 |
| C  | -1.844550000 | -9.032158000  | -0.510778000 |
| H  | -1.784097000 | -9.957215000  | 0.066987000  |
| C  | -2.420513000 | -7.903928000  | 0.075432000  |
| C  | -2.005619000 | -5.412586000  | -2.811721000 |
| H  | -1.113677000 | -4.790321000  | -2.631518000 |
| H  | -2.873269000 | -4.775704000  | -2.597130000 |
| H  | -2.021784000 | -5.675111000  | -3.879701000 |
| C  | -0.783260000 | -10.248294000 | -2.449173000 |
| H  | -1.543380000 | -10.747206000 | -3.072335000 |
| H  | -0.448181000 | -10.966780000 | -1.688672000 |
| H  | 0.072630000  | -10.005885000 | -3.095811000 |
| C  | -2.946497000 | -8.016101000  | 1.482936000  |
| H  | -2.560111000 | -7.213055000  | 2.127878000  |
| H  | -2.654138000 | -8.976142000  | 1.929644000  |
| H  | -4.044751000 | -7.943709000  | 1.504637000  |
| C  | -4.550839000 | -5.494795000  | 0.643293000  |
| C  | -4.778389000 | -5.043920000  | 1.964466000  |
| C  | -6.049078000 | -5.155792000  | 2.528656000  |
| H  | -6.203521000 | -4.820013000  | 3.557270000  |
| C  | -7.127810000 | -5.678376000  | 1.815233000  |
| C  | -6.899803000 | -6.113506000  | 0.510778000  |
| H  | -7.731153000 | -6.523681000  | -0.066987000 |
| C  | -5.634746000 | -6.048190000  | -0.075432000 |
| C  | -3.684628000 | -4.443210000  | 2.811721000  |
| H  | -3.591701000 | -3.359633000  | 2.631518000  |
| H  | -2.699246000 | -4.876176000  | 2.597130000  |
| H  | -3.903898000 | -4.588472000  | 3.879701000  |
| C  | -8.483652000 | -5.802470000  | 2.449173000  |
| H  | -9.273420000 | -5.871526000  | 1.688672000  |
| H  | -8.701666000 | -4.940043000  | 3.095811000  |
| H  | -8.535663000 | -6.710209000  | 3.072335000  |
| C  | -5.468899000 | -6.559792000  | -1.482936000 |
| H  | -6.446498000 | -6.786622000  | -1.929644000 |
| H  | -4.857078000 | -7.474711000  | -1.504637000 |
| H  | -4.966634000 | -5.823649000  | -2.127878000 |
| B  | -3.123269000 | -5.409660000  | 0.000000000  |
| C  | -4.302934000 | -2.298590000  | -0.054370000 |
| H  | -4.595751000 | -2.135942000  | -1.105543000 |
| H  | -5.000632000 | -3.028553000  | 0.375382000  |
| H  | -4.415184000 | -1.341693000  | 0.478584000  |
| Cu | 0.939155000  | 1.626664000   | 0.000000000  |
| N  | -1.889535000 | 1.886251000   | -0.003585000 |
| N  | -0.688773000 | 2.579510000   | 0.003585000  |
| C  | -2.893792000 | 2.774044000   | -0.019864000 |
| C  | -2.361783000 | 4.090727000   | 0.000000000  |
| C  | -0.955497000 | 3.893119000   | 0.019864000  |
| C  | -4.302934000 | 2.298590000   | 0.054370000  |
| H  | -4.595751000 | 2.135942000   | 1.105543000  |
| H  | -4.415184000 | 1.341693000   | -0.478584000 |
| H  | -5.000632000 | 3.028553000   | -0.375382000 |
| C  | -4.550839000 | 5.494795000   | -0.643293000 |
| C  | -4.778389000 | 5.043920000   | -1.964466000 |
| C  | -6.049078000 | 5.155792000   | -2.528656000 |
| H  | -6.203521000 | 4.820013000   | -3.557270000 |
| C  | -7.127810000 | 5.678376000   | -1.815233000 |

|    |              |              |              |
|----|--------------|--------------|--------------|
| C  | -6.899803000 | 6.113506000  | -0.510778000 |
| H  | -7.731153000 | 6.523681000  | 0.066987000  |
| C  | -5.634746000 | 6.048190000  | 0.075432000  |
| C  | -3.684628000 | 4.443210000  | -2.811721000 |
| H  | -3.591701000 | 3.359633000  | -2.631518000 |
| H  | -2.699246000 | 4.876176000  | -2.597130000 |
| H  | -3.903898000 | 4.588472000  | -3.879701000 |
| C  | -8.483652000 | 5.802470000  | -2.449173000 |
| H  | -8.535663000 | 6.710209000  | -3.072335000 |
| H  | -9.273420000 | 5.871526000  | -1.688672000 |
| H  | -8.701666000 | 4.940043000  | -3.095811000 |
| C  | -5.468899000 | 6.559792000  | 1.482936000  |
| H  | -4.966634000 | 5.823649000  | 2.127878000  |
| H  | -6.446498000 | 6.786622000  | 1.929644000  |
| H  | -4.857078000 | 7.474711000  | 1.504637000  |
| C  | -2.483213000 | 6.688540000  | 0.643293000  |
| C  | -1.978968000 | 6.660166000  | 1.964466000  |
| C  | -1.440508000 | 7.816551000  | 2.528656000  |
| H  | -1.072493000 | 7.782413000  | 3.557270000  |
| C  | -1.353713000 | 9.012052000  | 1.815233000  |
| C  | -1.844550000 | 9.032158000  | 0.510778000  |
| H  | -1.784097000 | 9.957215000  | -0.066987000 |
| C  | -2.420513000 | 7.903928000  | -0.075432000 |
| C  | -2.005619000 | 5.412586000  | 2.811721000  |
| H  | -1.113677000 | 4.790321000  | 2.631518000  |
| H  | -2.873269000 | 4.775704000  | 2.597130000  |
| H  | -2.021784000 | 5.675111000  | 3.879701000  |
| C  | -0.783260000 | 10.248294000 | 2.449173000  |
| H  | -0.448181000 | 10.966780000 | 1.688672000  |
| H  | 0.072630000  | 10.005885000 | 3.095811000  |
| H  | -1.543380000 | 10.747206000 | 3.072335000  |
| C  | -2.946497000 | 8.016101000  | -1.482936000 |
| H  | -2.654138000 | 8.976142000  | -1.929644000 |
| H  | -4.044751000 | 7.943709000  | -1.504637000 |
| H  | -2.560111000 | 7.213055000  | -2.127878000 |
| B  | -3.123269000 | 5.409660000  | 0.000000000  |
| C  | 0.160830000  | 4.875746000  | -0.054370000 |
| H  | 0.448096000  | 5.048008000  | -1.105543000 |
| H  | -0.122488000 | 5.844951000  | 0.375382000  |
| H  | 1.045651000  | 4.494508000  | 0.478584000  |
| Cu | 0.939155000  | -1.626664000 | 0.000000000  |
| N  | 2.578308000  | 0.693260000  | -0.003585000 |
| N  | 2.578308000  | -0.693260000 | 0.003585000  |
| C  | 3.849289000  | 1.119075000  | -0.019864000 |
| C  | 4.723565000  | 0.000000000  | 0.000000000  |
| C  | 3.849289000  | -1.119075000 | 0.019864000  |
| C  | 4.142105000  | 2.577156000  | 0.054370000  |
| H  | 4.147656000  | 2.912066000  | 1.105543000  |
| H  | 3.369532000  | 3.152815000  | -0.478584000 |
| H  | 5.123120000  | 2.816398000  | -0.375382000 |
| C  | 7.034052000  | 1.193745000  | -0.643293000 |
| C  | 6.757357000  | 1.616246000  | -1.964466000 |
| C  | 7.489586000  | 2.660759000  | -2.528656000 |
| H  | 7.276014000  | 2.962401000  | -3.557270000 |
| C  | 8.481522000  | 3.333676000  | -1.815233000 |
| C  | 8.744353000  | 2.918651000  | -0.510778000 |
| H  | 9.515250000  | 3.433534000  | 0.066987000  |
| C  | 8.055259000  | 1.855738000  | 0.075432000  |
| C  | 5.690246000  | 0.969376000  | -2.811721000 |
| H  | 4.705378000  | 1.430688000  | -2.631518000 |
| H  | 5.572516000  | -0.100472000 | -2.597130000 |
| H  | 5.925682000  | 1.086639000  | -3.879701000 |
| C  | 9.266913000  | 4.445823000  | -2.449173000 |

|   |              |              |              |
|---|--------------|--------------|--------------|
| H | 10.079043000 | 4.036997000  | -3.072335000 |
| H | 9.721601000  | 5.095254000  | -1.688672000 |
| H | 8.629035000  | 5.065842000  | -3.095811000 |
| C | 8.415396000  | 1.456310000  | 1.482936000  |
| H | 7.526745000  | 1.389406000  | 2.127878000  |
| H | 9.100636000  | 2.189520000  | 1.929644000  |
| H | 8.901829000  | 0.468997000  | 1.504637000  |
| C | 7.034052000  | -1.193745000 | 0.643293000  |
| C | 6.757357000  | -1.616246000 | 1.964466000  |
| C | 7.489586000  | -2.660759000 | 2.528656000  |
| H | 7.276014000  | -2.962401000 | 3.557270000  |
| C | 8.481522000  | -3.333676000 | 1.815233000  |
| C | 8.744353000  | -2.918651000 | 0.510778000  |
| H | 9.515250000  | -3.433534000 | -0.066987000 |
| C | 8.055259000  | -1.855738000 | -0.075432000 |
| C | 5.690246000  | -0.969376000 | 2.811721000  |
| H | 4.705378000  | -1.430688000 | 2.631518000  |
| H | 5.572516000  | 0.100472000  | 2.597130000  |
| H | 5.925682000  | -1.086639000 | 3.879701000  |
| C | 9.266913000  | -4.445823000 | 2.449173000  |
| H | 9.721601000  | -5.095254000 | 1.688672000  |
| H | 8.629035000  | -5.065842000 | 3.095811000  |
| H | 10.079043000 | -4.036997000 | 3.072335000  |
| C | 8.415396000  | -1.456310000 | -1.482936000 |
| H | 9.100636000  | -2.189520000 | -1.929644000 |
| H | 8.901829000  | -0.468997000 | -1.504637000 |
| H | 7.526745000  | -1.389406000 | -2.127878000 |
| B | 6.246538000  | 0.000000000  | 0.000000000  |
| C | 4.142105000  | -2.577156000 | -0.054370000 |
| H | 4.147656000  | -2.912066000 | -1.105543000 |
| H | 5.123120000  | -2.816398000 | 0.375382000  |
| H | 3.369532000  | -3.152815000 | 0.478584000  |

165

Cu3CH3-T1

|    |              |               |              |
|----|--------------|---------------|--------------|
| Cu | -1.877767000 | 0.000000000   | 0.000000000  |
| N  | -0.683783000 | -2.572694000  | 0.056331000  |
| N  | -1.886127000 | -1.878521000  | -0.056331000 |
| C  | -0.952867000 | -3.885958000  | 0.081225000  |
| C  | -2.359987000 | -4.087617000  | 0.000000000  |
| C  | -2.888905000 | -2.768186000  | -0.081225000 |
| C  | 0.147212000  | -4.877969000  | 0.187622000  |
| H  | -0.171495000 | -5.759193000  | 0.761087000  |
| H  | 1.024806000  | -4.426947000  | 0.675968000  |
| H  | 0.453307000  | -5.239169000  | -0.807652000 |
| C  | -2.403575000 | -6.733936000  | -0.437250000 |
| C  | -1.689662000 | -6.842745000  | -1.657981000 |
| C  | -1.004332000 | -8.017961000  | -1.969746000 |
| H  | -0.460846000 | -8.079208000  | -2.916187000 |
| C  | -1.007102000 | -9.119460000  | -1.117369000 |
| C  | -1.730946000 | -9.020778000  | 0.074391000  |
| H  | -1.738881000 | -9.869498000  | 0.762437000  |
| C  | -2.429623000 | -7.866560000  | 0.418677000  |
| C  | -1.704829000 | -5.752190000  | -2.694734000 |
| H  | -0.754122000 | -5.719925000  | -3.248642000 |
| H  | -1.898315000 | -4.760886000  | -2.264418000 |
| H  | -2.503730000 | -5.949012000  | -3.431892000 |
| C  | -0.287864000 | -10.386416000 | -1.478245000 |
| H  | -0.974494000 | -11.097922000 | -1.965774000 |
| H  | 0.120180000  | -10.879771000 | -0.584771000 |
| H  | 0.539793000  | -10.191383000 | -2.173653000 |
| C  | -3.155785000 | -7.832287000  | 1.737256000  |
| H  | -2.853929000 | -6.956068000  | 2.330985000  |
| H  | -2.937762000 | -8.734935000  | 2.325657000  |



|    |              |              |              |
|----|--------------|--------------|--------------|
| H  | -4.245826000 | -7.764197000 | 1.595794000  |
| C  | -4.629973000 | -5.448525000 | 0.437250000  |
| C  | -5.081160000 | -4.884662000 | 1.657981000  |
| C  | -6.441592000 | -4.878758000 | 1.969746000  |
| H  | -6.766376000 | -4.438709000 | 2.916187000  |
| C  | -7.394133000 | -5.431905000 | 1.117369000  |
| C  | -6.946750000 | -6.009432000 | -0.074391000 |
| H  | -7.677796000 | -6.440665000 | -0.762437000 |
| C  | -5.597830000 | -6.037395000 | -0.418677000 |
| C  | -4.129128000 | -4.352520000 | 2.694734000  |
| H  | -4.576540000 | -3.513051000 | 3.248642000  |
| H  | -3.173891000 | -4.024432000 | 2.264418000  |
| H  | -3.900131000 | -5.142800000 | 3.431892000  |
| C  | -8.850968000 | -5.442506000 | 1.478245000  |
| H  | -9.482248000 | -5.335806000 | 0.584771000  |
| H  | -9.095893000 | -4.628217000 | 2.173653000  |
| H  | -9.123835000 | -6.392897000 | 1.965774000  |
| C  | -5.205067000 | -6.649133000 | -1.737256000 |
| H  | -6.095794000 | -6.911644000 | -2.325657000 |
| H  | -4.601078000 | -7.559092000 | -1.595794000 |
| H  | -4.597167000 | -5.949609000 | -2.330985000 |
| B  | -3.126351000 | -5.415000000 | 0.000000000  |
| C  | -4.298051000 | -2.311495000 | -0.187622000 |
| H  | -4.901860000 | -3.028116000 | -0.761087000 |
| H  | -4.763907000 | -2.227009000 | 0.807652000  |
| H  | -4.346252000 | -1.325966000 | -0.675968000 |
| Cu | 0.938884000  | 1.626194000  | 0.000000000  |
| N  | -1.886127000 | 1.878521000  | 0.056331000  |
| N  | -0.683783000 | 2.572694000  | -0.056331000 |
| C  | -2.888905000 | 2.768186000  | 0.081225000  |
| C  | -2.359987000 | 4.087617000  | 0.000008000  |
| C  | -0.952867000 | 3.885958000  | -0.081225000 |
| C  | -4.298051000 | 2.311495000  | 0.187622000  |
| H  | -4.901860000 | 3.028116000  | 0.761087000  |
| H  | -4.346252000 | 1.325966000  | 0.675968000  |
| H  | -4.763907000 | 2.227009000  | -0.807652000 |
| C  | -4.629973000 | 5.448525000  | -0.437250000 |
| C  | -5.081160000 | 4.884662000  | -1.657981000 |
| C  | -6.441592000 | 4.878758000  | -1.969746000 |
| H  | -6.766376000 | 4.438709000  | -2.916187000 |
| C  | -7.394133000 | 5.431905000  | -1.117369000 |
| C  | -6.946750000 | 6.009432000  | 0.074391000  |
| H  | -7.677796000 | 6.440665000  | 0.762437000  |
| C  | -5.597830000 | 6.037395000  | 0.418677000  |
| C  | -4.129128000 | 4.352520000  | -2.694734000 |
| H  | -4.576540000 | 3.513051000  | -3.248642000 |
| H  | -3.173891000 | 4.024432000  | -2.264418000 |
| H  | -3.900131000 | 5.142800000  | -3.431892000 |
| C  | -8.850968000 | 5.442506000  | -1.478245000 |
| H  | -9.123835000 | 6.392897000  | -1.965774000 |
| H  | -9.482248000 | 5.335806000  | -0.584771000 |
| H  | -9.095893000 | 4.628217000  | -2.173653000 |
| C  | -5.205067000 | 6.649133000  | 1.737256000  |
| H  | -4.597167000 | 5.949609000  | 2.330985000  |
| H  | -6.095794000 | 6.911644000  | 2.325657000  |
| H  | -4.601078000 | 7.559092000  | 1.595794000  |
| C  | -2.403575000 | 6.733936000  | 0.437250000  |
| C  | -1.689662000 | 6.842745000  | 1.657981000  |
| C  | -1.004332000 | 8.017961000  | 1.969746000  |
| H  | -0.460846000 | 8.079208000  | 2.916187000  |
| C  | -1.007102000 | 9.119460000  | 1.117369000  |
| C  | -1.730946000 | 9.020778000  | -0.074391000 |
| H  | -1.738881000 | 9.869498000  | -0.762437000 |

|    |              |              |              |
|----|--------------|--------------|--------------|
| C  | -2.429623000 | 7.866560000  | -0.418677000 |
| C  | -1.704829000 | 5.752190000  | 2.694734000  |
| H  | -0.754122000 | 5.719925000  | 3.248642000  |
| H  | -1.898315000 | 4.760886000  | 2.264418000  |
| H  | -2.503730000 | 5.949012000  | 3.431892000  |
| C  | -0.287864000 | 10.386416000 | 1.478245000  |
| H  | 0.120180000  | 10.879771000 | 0.584771000  |
| H  | 0.539793000  | 10.191383000 | 2.173653000  |
| H  | -0.974494000 | 11.097922000 | 1.965774000  |
| C  | -3.155785000 | 7.832287000  | -1.737256000 |
| H  | -2.937762000 | 8.734935000  | -2.325657000 |
| H  | -4.245826000 | 7.764197000  | -1.595794000 |
| H  | -2.853929000 | 6.956068000  | -2.330985000 |
| B  | -3.126351000 | 5.415000000  | 0.000000000  |
| C  | 0.147212000  | 4.877969000  | -0.187622000 |
| H  | -0.171495000 | 5.759193000  | -0.761087000 |
| H  | 0.453307000  | 5.239169000  | 0.807652000  |
| H  | 1.024806000  | 4.426947000  | -0.675968000 |
| Cu | 0.938884000  | -1.626194000 | 0.000000000  |
| N  | 2.569910000  | 0.694174000  | 0.056331000  |
| N  | 2.569910000  | -0.694174000 | -0.056331000 |
| C  | 3.841772000  | 1.117772000  | 0.081225000  |
| C  | 4.719974000  | 0.000000000  | 0.000000000  |
| C  | 3.841772000  | -1.117772000 | -0.081225000 |
| C  | 4.150839000  | 2.566474000  | 0.187622000  |
| H  | 5.073355000  | 2.731077000  | 0.761087000  |
| H  | 3.321446000  | 3.100981000  | 0.675968000  |
| H  | 4.310600000  | 3.012159000  | -0.807652000 |
| C  | 7.033547000  | 1.285411000  | -0.437250000 |
| C  | 6.770822000  | 1.958083000  | -1.657981000 |
| C  | 7.445924000  | 3.139203000  | -1.969746000 |
| H  | 7.227222000  | 3.640499000  | -2.916187000 |
| C  | 8.401234000  | 3.687554000  | -1.117369000 |
| C  | 8.677696000  | 3.011346000  | 0.074391000  |
| H  | 9.416677000  | 3.428834000  | 0.762437000  |
| C  | 8.027452000  | 1.829165000  | 0.418677000  |
| C  | 5.833957000  | 1.399670000  | -2.694734000 |
| H  | 5.330661000  | 2.206874000  | -3.248642000 |
| H  | 5.072206000  | 0.736454000  | -2.264418000 |
| H  | 6.403861000  | 0.806212000  | -3.431892000 |
| C  | 9.138832000  | 4.943910000  | -1.478245000 |
| H  | 10.098329000 | 4.705025000  | -1.965774000 |
| H  | 9.362068000  | 5.543965000  | -0.584771000 |
| H  | 8.556100000  | 5.563166000  | -2.173653000 |
| C  | 8.360852000  | 1.183153000  | 1.737256000  |
| H  | 7.451096000  | 1.006459000  | 2.330985000  |
| H  | 9.033557000  | 1.823291000  | 2.325657000  |
| H  | 8.846905000  | 0.205105000  | 1.595794000  |
| C  | 7.033547000  | -1.285411000 | 0.437250000  |
| C  | 6.770822000  | -1.958083000 | 1.657981000  |
| C  | 7.445924000  | -3.139203000 | 1.969746000  |
| H  | 7.227222000  | -3.640499000 | 2.916187000  |
| C  | 8.401234000  | -3.687554000 | 1.117369000  |
| C  | 8.677696000  | -3.011346000 | -0.074391000 |
| H  | 9.416677000  | -3.428834000 | -0.762437000 |
| C  | 8.027452000  | -1.829165000 | -0.418677000 |
| C  | 5.833957000  | -1.399670000 | 2.694734000  |
| H  | 5.330661000  | -2.206874000 | 3.248642000  |
| H  | 5.072206000  | -0.736454000 | 2.264418000  |
| H  | 6.403861000  | -0.806212000 | 3.431892000  |
| C  | 9.138832000  | -4.943910000 | 1.478245000  |
| H  | 9.362068000  | -5.543965000 | 0.584771000  |
| H  | 8.556100000  | -5.563166000 | 2.173653000  |

|   |              |              |              |
|---|--------------|--------------|--------------|
| H | 10.098329000 | -4.705025000 | 1.965774000  |
| C | 8.360852000  | -1.183153000 | -1.737256000 |
| H | 9.033557000  | -1.823291000 | -2.325657000 |
| H | 8.846905000  | -0.205105000 | -1.595794000 |
| H | 7.451096000  | -1.006459000 | -2.330985000 |
| B | 6.252703000  | 0.000000000  | 0.000000000  |
| C | 4.150839000  | -2.566474000 | -0.187622000 |
| H | 5.073355000  | -2.731077000 | -0.761087000 |
| H | 4.310600000  | -3.012159000 | 0.807652000  |
| H | 3.321446000  | -3.100981000 | -0.675968000 |

342

Cu3CF3-Bz-Cu3CF3 dimer S0

|    |              |              |              |
|----|--------------|--------------|--------------|
| Cu | -1.557745000 | 1.784616000  | 2.646851000  |
| Cu | -1.108175000 | -1.397926000 | 2.564598000  |
| F  | 0.195835000  | 3.622637000  | 4.341997000  |
| F  | 1.348293000  | 3.735079000  | 2.486034000  |
| F  | 2.394827000  | 3.566589000  | 4.402828000  |
| F  | 3.459236000  | -1.939783000 | 3.577738000  |
| F  | 1.674301000  | -2.608015000 | 4.664701000  |
| F  | 1.687252000  | -2.605879000 | 2.480840000  |
| F  | -0.476386000 | -4.201252000 | 2.735192000  |
| F  | -1.639368000 | -5.972335000 | 2.188308000  |
| F  | -0.827744000 | -4.662885000 | 0.619431000  |
| N  | 0.101348000  | 1.064831000  | 3.243549000  |
| N  | 0.303515000  | -0.275211000 | 3.199756000  |
| N  | -2.589146000 | -2.532394000 | 2.126455000  |
| C  | 1.268804000  | 1.652840000  | 3.593852000  |
| C  | 2.263178000  | 0.688209000  | 3.830219000  |
| C  | 1.586395000  | -0.512555000 | 3.556233000  |
| C  | 1.307864000  | 3.136345000  | 3.707933000  |
| C  | 2.104602000  | -1.907776000 | 3.579630000  |
| C  | 4.045960000  | 0.058741000  | 5.722090000  |
| C  | 5.282133000  | -0.628080000 | 5.838829000  |
| C  | 5.581671000  | -1.306666000 | 7.018889000  |
| H  | 6.524855000  | -1.850704000 | 7.086119000  |
| C  | 4.717138000  | -1.306507000 | 8.111678000  |
| C  | 3.508324000  | -0.621600000 | 7.995212000  |
| H  | 2.820762000  | -0.604628000 | 8.842360000  |
| C  | 3.152215000  | 0.040807000  | 6.824367000  |
| C  | 6.294700000  | -0.695606000 | 4.721733000  |
| H  | 5.827244000  | -0.903127000 | 3.752537000  |
| H  | 7.018902000  | -1.498005000 | 4.914685000  |
| H  | 6.853216000  | 0.247879000  | 4.620220000  |
| C  | 5.076277000  | -2.009939000 | 9.386799000  |
| H  | 5.320918000  | -1.278853000 | 10.171939000 |
| H  | 5.946129000  | -2.662701000 | 9.247446000  |
| H  | 4.237346000  | -2.621136000 | 9.748765000  |
| C  | 1.829884000  | 0.767170000  | 6.811863000  |
| H  | 1.930332000  | 1.800832000  | 6.455866000  |
| H  | 1.409196000  | 0.804682000  | 7.825051000  |
| H  | 1.099589000  | 0.260905000  | 6.164349000  |
| C  | 4.800257000  | 1.716687000  | 3.743704000  |
| C  | 5.163673000  | 1.524525000  | 2.392078000  |
| C  | 6.294531000  | 2.158828000  | 1.882823000  |
| H  | 6.593284000  | 1.954924000  | 0.857116000  |
| C  | 7.042457000  | 3.055665000  | 2.644781000  |
| C  | 6.642822000  | 3.292025000  | 3.959801000  |
| H  | 7.199817000  | 4.011500000  | 4.565975000  |
| C  | 5.563715000  | 2.618650000  | 4.528394000  |
| C  | 4.407137000  | 0.583749000  | 1.491156000  |
| H  | 4.627026000  | 0.801074000  | 0.435996000  |
| H  | 3.327426000  | 0.671642000  | 1.649362000  |
| H  | 4.691070000  | -0.466697000 | 1.674943000  |

|    |              |              |              |
|----|--------------|--------------|--------------|
| C  | 8.213606000  | 3.784082000  | 2.051469000  |
| H  | 7.875322000  | 4.713578000  | 1.563520000  |
| H  | 8.718434000  | 3.172214000  | 1.287989000  |
| H  | 8.945811000  | 4.059926000  | 2.825742000  |
| C  | 5.249150000  | 2.880780000  | 5.979103000  |
| H  | 5.676335000  | 2.094328000  | 6.620341000  |
| H  | 4.168558000  | 2.906194000  | 6.170654000  |
| H  | 5.670881000  | 3.845808000  | 6.294678000  |
| C  | -2.657434000 | -3.862916000 | 1.894372000  |
| C  | -3.989074000 | -4.280212000 | 1.740315000  |
| C  | -1.408943000 | -4.680167000 | 1.855376000  |
| C  | -5.710756000 | -6.285131000 | 2.228272000  |
| C  | -6.785069000 | -6.926808000 | 1.566047000  |
| C  | -7.867502000 | -7.403903000 | 2.303049000  |
| H  | -8.702117000 | -7.871970000 | 1.779149000  |
| C  | -7.910500000 | -7.299957000 | 3.689923000  |
| C  | -6.837346000 | -6.689413000 | 4.339157000  |
| H  | -6.851384000 | -6.608283000 | 5.426191000  |
| C  | -5.751167000 | -6.174004000 | 3.638685000  |
| C  | -6.819553000 | -7.102157000 | 0.072376000  |
| H  | -6.464635000 | -6.210591000 | -0.455691000 |
| H  | -7.842597000 | -7.317217000 | -0.261033000 |
| H  | -6.174885000 | -7.931829000 | -0.247069000 |
| C  | -9.070521000 | -7.842454000 | 4.473636000  |
| H  | -8.764656000 | -8.723186000 | 5.057124000  |
| H  | -9.894151000 | -8.141339000 | 3.814761000  |
| H  | -9.448144000 | -7.089902000 | 5.178334000  |
| C  | -4.622953000 | -5.556175000 | 4.426021000  |
| H  | -3.641295000 | -5.902703000 | 4.079253000  |
| H  | -4.714258000 | -5.815788000 | 5.487647000  |
| H  | -4.630701000 | -4.460350000 | 4.346466000  |
| B  | 3.705597000  | 0.840774000  | 4.417652000  |
| B  | -4.526047000 | -5.709295000 | 1.407296000  |
| F  | -6.524170000 | -1.588362000 | 1.574540000  |
| F  | -6.824916000 | -3.710702000 | 1.075765000  |
| F  | -6.703569000 | -3.075079000 | 3.178857000  |
| N  | -3.860560000 | -2.036281000 | 2.092256000  |
| C  | -4.704295000 | -3.080103000 | 1.901430000  |
| C  | -6.182915000 | -2.875633000 | 1.929957000  |
| C  | -3.839329000 | -6.497746000 | 0.260891000  |
| C  | -3.454340000 | -7.843179000 | 0.458923000  |
| C  | -2.774506000 | -8.519258000 | -0.550511000 |
| H  | -2.451588000 | -9.545314000 | -0.374526000 |
| C  | -2.493765000 | -7.919424000 | -1.775245000 |
| C  | -2.916169000 | -6.607955000 | -1.980509000 |
| H  | -2.726679000 | -6.129779000 | -2.940737000 |
| C  | -3.567253000 | -5.888053000 | -0.986279000 |
| C  | -3.727324000 | -8.571534000 | 1.746715000  |
| H  | -3.445966000 | -7.975404000 | 2.621507000  |
| H  | -3.160422000 | -9.509062000 | 1.781204000  |
| H  | -4.794741000 | -8.813158000 | 1.854149000  |
| C  | -1.765056000 | -8.660397000 | -2.855956000 |
| H  | -2.435700000 | -8.866557000 | -3.702817000 |
| H  | -1.373680000 | -9.614596000 | -2.487358000 |
| H  | -0.923059000 | -8.065404000 | -3.234121000 |
| C  | -4.032168000 | -4.494643000 | -1.301509000 |
| H  | -5.035215000 | -4.301425000 | -0.905610000 |
| H  | -4.070123000 | -4.333588000 | -2.384097000 |
| H  | -3.360468000 | -3.737390000 | -0.870635000 |
| Cu | -4.100700000 | -0.142785000 | 1.987240000  |
| F  | -1.331369000 | 4.548401000  | 1.669749000  |
| F  | -2.487548000 | 5.264886000  | 3.386444000  |
| F  | -2.920109000 | 6.038180000  | 1.380720000  |

|    |              |              |              |
|----|--------------|--------------|--------------|
| F  | -7.589018000 | 2.936070000  | 1.072229000  |
| F  | -6.654712000 | 1.385821000  | -0.164607000 |
| F  | -6.989979000 | 1.031495000  | 1.970607000  |
| N  | -3.204196000 | 2.537074000  | 2.056763000  |
| N  | -4.277656000 | 1.747237000  | 1.783087000  |
| C  | -3.571403000 | 3.823123000  | 1.849076000  |
| C  | -4.898132000 | 3.901364000  | 1.399699000  |
| C  | -5.290045000 | 2.555049000  | 1.383082000  |
| C  | -2.586536000 | 4.920352000  | 2.071017000  |
| C  | -6.627298000 | 1.983482000  | 1.058810000  |
| C  | -6.313458000 | 5.189745000  | -0.474674000 |
| C  | -7.644062000 | 5.634319000  | -0.685728000 |
| C  | -8.166325000 | 5.654256000  | -1.979040000 |
| H  | -9.198317000 | 5.978570000  | -2.123967000 |
| C  | -7.408802000 | 5.269616000  | -3.088976000 |
| C  | -6.098811000 | 4.839823000  | -2.877941000 |
| H  | -5.488591000 | 4.541142000  | -3.734107000 |
| C  | -5.546039000 | 4.782480000  | -1.599908000 |
| C  | -8.554514000 | 6.066883000  | 0.442773000  |
| H  | -8.478843000 | 5.398600000  | 1.311323000  |
| H  | -9.600491000 | 6.065026000  | 0.108216000  |
| H  | -8.313949000 | 7.082121000  | 0.796106000  |
| C  | -7.974486000 | 5.333360000  | -4.479592000 |
| H  | -7.556976000 | 6.197092000  | -5.022924000 |
| H  | -9.065416000 | 5.439213000  | -4.460657000 |
| H  | -7.720148000 | 4.428767000  | -5.050481000 |
| C  | -4.109054000 | 4.339903000  | -1.485915000 |
| H  | -3.518506000 | 5.020257000  | -0.858240000 |
| H  | -3.642077000 | 4.314430000  | -2.477701000 |
| H  | -4.029300000 | 3.331928000  | -1.052278000 |
| C  | -5.920545000 | 6.343259000  | 1.952146000  |
| C  | -6.311315000 | 6.121615000  | 3.296314000  |
| C  | -6.590718000 | 7.206440000  | 4.124091000  |
| H  | -6.922415000 | 7.017589000  | 5.145126000  |
| C  | -6.456364000 | 8.522332000  | 3.685729000  |
| C  | -6.032777000 | 8.736271000  | 2.376984000  |
| H  | -5.899341000 | 9.759771000  | 2.023801000  |
| C  | -5.780597000 | 7.681226000  | 1.503488000  |
| C  | -6.518622000 | 4.739488000  | 3.859760000  |
| H  | -6.838992000 | 4.799642000  | 4.906843000  |
| H  | -5.598900000 | 4.140757000  | 3.821025000  |
| H  | -7.293274000 | 4.192329000  | 3.303757000  |
| C  | -6.724624000 | 9.671945000  | 4.610659000  |
| H  | -5.849977000 | 9.856326000  | 5.253121000  |
| H  | -7.580505000 | 9.459121000  | 5.263559000  |
| H  | -6.933024000 | 10.592392000 | 4.053170000  |
| C  | -5.350298000 | 8.024345000  | 0.101196000  |
| H  | -6.191535000 | 7.955333000  | -0.605655000 |
| H  | -4.565111000 | 7.355391000  | -0.266665000 |
| H  | -4.962332000 | 9.051313000  | 0.068530000  |
| B  | -5.716315000 | 5.163741000  | 0.961954000  |
| Cu | 1.557745000  | -1.784616000 | -2.646851000 |
| Cu | 1.108175000  | 1.397926000  | -2.564598000 |
| F  | -0.195835000 | -3.622637000 | -4.341997000 |
| F  | -1.348293000 | -3.735079000 | -2.486034000 |
| F  | -2.394827000 | -3.566589000 | -4.402828000 |
| F  | -3.459236000 | 1.939783000  | -3.577738000 |
| F  | -1.674301000 | 2.608015000  | -4.664701000 |
| F  | -1.687252000 | 2.605879000  | -2.480840000 |
| F  | 0.476386000  | 4.201252000  | -2.735192000 |
| F  | 1.639368000  | 5.972335000  | -2.188308000 |
| F  | 0.827744000  | 4.662885000  | -0.619431000 |
| N  | -0.101348000 | -1.064831000 | -3.243549000 |

|   |              |              |               |
|---|--------------|--------------|---------------|
| N | -0.303515000 | 0.275211000  | -3.199756000  |
| N | 2.589146000  | 2.532394000  | -2.126455000  |
| C | -1.268804000 | -1.652840000 | -3.593852000  |
| C | -2.263178000 | -0.688209000 | -3.830219000  |
| C | -1.586395000 | 0.512555000  | -3.556233000  |
| C | -1.307864000 | -3.136345000 | -3.707933000  |
| C | -2.104602000 | 1.907776000  | -3.579630000  |
| C | -4.045960000 | -0.058741000 | -5.722090000  |
| C | -5.282133000 | 0.628080000  | -5.838829000  |
| C | -5.581671000 | 1.306666000  | -7.018889000  |
| H | -6.524855000 | 1.850704000  | -7.086119000  |
| C | -4.717138000 | 1.306507000  | -8.111678000  |
| C | -3.508324000 | 0.621600000  | -7.995212000  |
| H | -2.820762000 | 0.604628000  | -8.842360000  |
| C | -3.152215000 | -0.040807000 | -6.824367000  |
| C | -6.294700000 | 0.695606000  | -4.721733000  |
| H | -5.827244000 | 0.903127000  | -3.752537000  |
| H | -7.018902000 | 1.498005000  | -4.914685000  |
| H | -6.853216000 | -0.247879000 | -4.620220000  |
| C | -5.076277000 | 2.009939000  | -9.386799000  |
| H | -5.320918000 | 1.278853000  | -10.171939000 |
| H | -5.946129000 | 2.662701000  | -9.247446000  |
| H | -4.237346000 | 2.621136000  | -9.748765000  |
| C | -1.829884000 | -0.767170000 | -6.811863000  |
| H | -1.930332000 | -1.800832000 | -6.455866000  |
| H | -1.409196000 | -0.804682000 | -7.825051000  |
| H | -1.099589000 | -0.260905000 | -6.164349000  |
| C | -4.800257000 | -1.716687000 | -3.743704000  |
| C | -5.163673000 | -1.524525000 | -2.392078000  |
| C | -6.294531000 | -2.158828000 | -1.882823000  |
| H | -6.593284000 | -1.954924000 | -0.857116000  |
| C | -7.042457000 | -3.055665000 | -2.644781000  |
| C | -6.642822000 | -3.292025000 | -3.959801000  |
| H | -7.199817000 | -4.011500000 | -4.565975000  |
| C | -5.563715000 | -2.618650000 | -4.528394000  |
| C | -4.407137000 | -0.583749000 | -1.491156000  |
| H | -4.627026000 | -0.801074000 | -0.435996000  |
| H | -3.327426000 | -0.671642000 | -1.649362000  |
| H | -4.691070000 | 0.466697000  | -1.674943000  |
| C | -8.213606000 | -3.784082000 | -2.051469000  |
| H | -7.875322000 | -4.713578000 | -1.563520000  |
| H | -8.718434000 | -3.172214000 | -1.287989000  |
| H | -8.945811000 | -4.059926000 | -2.825742000  |
| C | -5.249150000 | -2.880780000 | -5.979103000  |
| H | -5.676335000 | -2.094328000 | -6.620341000  |
| H | -4.168558000 | -2.906194000 | -6.170654000  |
| H | -5.670881000 | -3.845808000 | -6.294678000  |
| C | 2.657434000  | 3.862916000  | -1.894372000  |
| C | 3.989074000  | 4.280212000  | -1.740315000  |
| C | 1.408943000  | 4.680167000  | -1.855376000  |
| C | 5.710756000  | 6.285131000  | -2.228272000  |
| C | 6.785069000  | 6.926808000  | -1.566047000  |
| C | 7.867502000  | 7.403903000  | -2.303049000  |
| H | 8.702117000  | 7.871970000  | -1.779149000  |
| C | 7.910500000  | 7.299957000  | -3.689923000  |
| C | 6.837346000  | 6.689413000  | -4.339157000  |
| H | 6.851384000  | 6.608283000  | -5.426191000  |
| C | 5.751167000  | 6.174004000  | -3.638685000  |
| C | 6.819553000  | 7.102157000  | -0.072376000  |
| H | 6.464635000  | 6.210591000  | 0.455691000   |
| H | 7.842597000  | 7.317217000  | 0.261033000   |
| H | 6.174885000  | 7.931829000  | 0.247069000   |
| C | 9.070521000  | 7.842454000  | -4.473636000  |

|    |              |              |              |
|----|--------------|--------------|--------------|
| H  | 8.764656000  | 8.723186000  | -5.057124000 |
| H  | 9.894151000  | 8.141339000  | -3.814761000 |
| H  | 9.448144000  | 7.089902000  | -5.178334000 |
| C  | 4.622953000  | 5.556175000  | -4.426021000 |
| H  | 3.641295000  | 5.902703000  | -4.079253000 |
| H  | 4.714258000  | 5.815788000  | -5.487647000 |
| H  | 4.630701000  | 4.460350000  | -4.346466000 |
| B  | -3.705597000 | -0.840774000 | -4.417652000 |
| B  | 4.526047000  | 5.709295000  | -1.407296000 |
| F  | 6.524170000  | 1.588362000  | -1.574540000 |
| F  | 6.824916000  | 3.710702000  | -1.075765000 |
| F  | 6.703569000  | 3.075079000  | -3.178857000 |
| N  | 3.860560000  | 2.036281000  | -2.092256000 |
| C  | 4.704295000  | 3.080103000  | -1.901430000 |
| C  | 6.182915000  | 2.875633000  | -1.929957000 |
| C  | 3.839329000  | 6.497746000  | -0.260891000 |
| C  | 3.454340000  | 7.843179000  | -0.458923000 |
| C  | 2.774506000  | 8.519258000  | 0.550511000  |
| H  | 2.451588000  | 9.545314000  | 0.374526000  |
| C  | 2.493765000  | 7.919424000  | 1.775245000  |
| C  | 2.916169000  | 6.607955000  | 1.980509000  |
| H  | 2.726679000  | 6.129779000  | 2.940737000  |
| C  | 3.567253000  | 5.888053000  | 0.986279000  |
| C  | 3.727324000  | 8.571534000  | -1.746715000 |
| H  | 3.445966000  | 7.975404000  | -2.621507000 |
| H  | 3.160422000  | 9.509062000  | -1.781204000 |
| H  | 4.794741000  | 8.813158000  | -1.854149000 |
| C  | 1.765056000  | 8.660397000  | 2.855956000  |
| H  | 2.435700000  | 8.866557000  | 3.702817000  |
| H  | 1.373680000  | 9.614596000  | 2.487358000  |
| H  | 0.923059000  | 8.065404000  | 3.234121000  |
| C  | 4.032168000  | 4.494643000  | 1.301509000  |
| H  | 5.035215000  | 4.301425000  | 0.905610000  |
| H  | 4.070123000  | 4.333588000  | 2.384097000  |
| H  | 3.360468000  | 3.737390000  | 0.870635000  |
| Cu | 4.100700000  | 0.142785000  | -1.987240000 |
| F  | 1.331369000  | -4.548401000 | -1.669749000 |
| F  | 2.487548000  | -5.264886000 | -3.386444000 |
| F  | 2.920109000  | -6.038180000 | -1.380720000 |
| F  | 7.589018000  | -2.936070000 | -1.072229000 |
| F  | 6.654712000  | -1.385821000 | 0.164607000  |
| F  | 6.989979000  | -1.031495000 | -1.970607000 |
| N  | 3.204196000  | -2.537074000 | -2.056763000 |
| N  | 4.277656000  | -1.747237000 | -1.783087000 |
| C  | 3.571403000  | -3.823123000 | -1.849076000 |
| C  | 4.898132000  | -3.901364000 | -1.399699000 |
| C  | 5.290045000  | -2.555049000 | -1.383082000 |
| C  | 2.586536000  | -4.920352000 | -2.071017000 |
| C  | 6.627298000  | -1.983482000 | -1.058810000 |
| C  | 6.313458000  | -5.189745000 | 0.474674000  |
| C  | 7.644062000  | -5.634319000 | 0.685728000  |
| C  | 8.166325000  | -5.654256000 | 1.979040000  |
| H  | 9.198317000  | -5.978570000 | 2.123967000  |
| C  | 7.408802000  | -5.269616000 | 3.088976000  |
| C  | 6.098811000  | -4.839823000 | 2.877941000  |
| H  | 5.488591000  | -4.541142000 | 3.734107000  |
| C  | 5.546039000  | -4.782480000 | 1.599908000  |
| C  | 8.554514000  | -6.066883000 | -0.442773000 |
| H  | 8.478843000  | -5.398600000 | -1.311323000 |
| H  | 9.600491000  | -6.065026000 | -0.108216000 |
| H  | 8.313949000  | -7.082121000 | -0.796106000 |
| C  | 7.974486000  | -5.333360000 | 4.479592000  |
| H  | 7.556976000  | -6.197092000 | 5.022924000  |

|   |              |               |              |
|---|--------------|---------------|--------------|
| H | 9.065416000  | -5.439213000  | 4.460657000  |
| H | 7.720148000  | -4.428767000  | 5.050481000  |
| C | 4.109054000  | -4.339903000  | 1.485915000  |
| H | 3.518506000  | -5.020257000  | 0.858240000  |
| H | 3.642077000  | -4.314430000  | 2.477701000  |
| H | 4.029300000  | -3.331928000  | 1.052278000  |
| C | 5.920545000  | -6.343259000  | -1.952146000 |
| C | 6.311315000  | -6.121615000  | -3.296314000 |
| C | 6.590718000  | -7.206440000  | -4.124091000 |
| H | 6.922415000  | -7.017589000  | -5.145126000 |
| C | 6.456364000  | -8.522332000  | -3.685729000 |
| C | 6.032777000  | -8.736271000  | -2.376984000 |
| H | 5.899341000  | -9.759771000  | -2.023801000 |
| C | 5.780597000  | -7.681226000  | -1.503488000 |
| C | 6.518622000  | -4.739488000  | -3.859760000 |
| H | 6.838992000  | -4.799642000  | -4.906843000 |
| H | 5.598900000  | -4.140757000  | -3.821025000 |
| H | 7.293274000  | -4.192329000  | -3.303757000 |
| C | 6.724624000  | -9.671945000  | -4.610659000 |
| H | 5.849977000  | -9.856326000  | -5.253121000 |
| H | 7.580505000  | -9.459121000  | -5.263559000 |
| H | 6.933024000  | -10.592392000 | -4.053170000 |
| C | 5.350298000  | -8.024345000  | -0.101196000 |
| H | 6.191535000  | -7.955333000  | 0.605655000  |
| H | 4.565111000  | -7.355391000  | 0.266665000  |
| H | 4.962332000  | -9.051313000  | -0.068530000 |
| B | 5.716315000  | -5.163741000  | -0.961954000 |
| C | -0.261425000 | 1.370792000   | 0.038894000  |
| H | -0.457111000 | 2.442872000   | 0.053727000  |
| C | 1.045282000  | 0.902384000   | 0.208093000  |
| H | 1.851324000  | 1.611314000   | 0.388448000  |
| C | 1.306003000  | -0.468176000  | 0.170933000  |
| H | 2.317782000  | -0.841595000  | 0.319860000  |
| C | 0.261425000  | -1.370792000  | -0.038894000 |
| H | 0.457111000  | -2.442872000  | -0.053727000 |
| C | -1.045282000 | -0.902384000  | -0.208093000 |
| H | -1.851324000 | -1.611314000  | -0.388448000 |
| C | -1.306003000 | 0.468176000   | -0.170933000 |
| H | -2.317782000 | 0.841595000   | -0.319860000 |

342

Cu3CF3-Bz-CuCF3 dimer T1

|    |              |              |              |
|----|--------------|--------------|--------------|
| Cu | -1.378271000 | 1.511069000  | 2.595227000  |
| Cu | -0.880502000 | -1.663941000 | 2.636538000  |
| F  | 0.390234000  | 3.492925000  | 4.189386000  |
| F  | 1.583418000  | 3.375137000  | 2.358770000  |
| F  | 2.571947000  | 3.380227000  | 4.321945000  |
| F  | 3.360172000  | -2.320775000 | 4.165341000  |
| F  | 1.859617000  | -2.271690000 | 5.764109000  |
| F  | 1.324843000  | -3.058564000 | 3.798195000  |
| F  | -0.073779000 | -4.256546000 | 1.799475000  |
| F  | -1.263930000 | -6.101452000 | 1.806124000  |
| F  | -1.029730000 | -4.943661000 | -0.038817000 |
| N  | 0.245843000  | 0.825187000  | 3.326625000  |
| N  | 0.396214000  | -0.513310000 | 3.499752000  |
| N  | -2.330951000 | -2.741231000 | 1.973187000  |
| C  | 1.407613000  | 1.426978000  | 3.674402000  |
| C  | 2.352682000  | 0.483226000  | 4.108786000  |
| C  | 1.635694000  | -0.724604000 | 3.998268000  |
| C  | 1.497695000  | 2.912801000  | 3.635651000  |
| C  | 2.050448000  | -2.086541000 | 4.430000000  |
| C  | 4.299866000  | -0.061999000 | 5.864982000  |
| C  | 5.494179000  | -0.827334000 | 5.873580000  |
| C  | 5.856760000  | -1.516734000 | 7.031200000  |



|   |              |              |              |
|---|--------------|--------------|--------------|
| H | 6.765142000  | -2.122145000 | 7.019969000  |
| C | 5.102164000  | -1.449093000 | 8.200633000  |
| C | 3.948458000  | -0.664242000 | 8.194685000  |
| H | 3.353874000  | -0.582310000 | 9.107891000  |
| C | 3.530480000  | 0.011164000  | 7.052015000  |
| C | 6.382958000  | -0.970649000 | 4.665838000  |
| H | 5.824265000  | -1.293880000 | 3.776171000  |
| H | 7.159986000  | -1.722363000 | 4.852987000  |
| H | 6.882716000  | -0.023895000 | 4.409733000  |
| C | 5.508842000  | -2.199857000 | 9.434565000  |
| H | 5.635986000  | -1.516198000 | 10.286919000 |
| H | 6.454316000  | -2.736287000 | 9.282278000  |
| H | 4.738901000  | -2.935788000 | 9.711723000  |
| C | 2.277365000  | 0.846313000  | 7.138070000  |
| H | 2.400456000  | 1.828441000  | 6.659410000  |
| H | 2.002977000  | 1.019143000  | 8.188982000  |
| H | 1.426522000  | 0.346681000  | 6.647249000  |
| C | 4.866128000  | 1.484176000  | 3.737522000  |
| C | 5.098708000  | 1.214884000  | 2.370732000  |
| C | 6.180797000  | 1.801449000  | 1.713390000  |
| H | 6.363024000  | 1.554943000  | 0.666626000  |
| C | 7.022111000  | 2.702608000  | 2.356731000  |
| C | 6.755034000  | 3.013023000  | 3.692591000  |
| H | 7.385559000  | 3.744863000  | 4.203661000  |
| C | 5.718142000  | 2.409487000  | 4.394532000  |
| C | 4.266875000  | 0.224569000  | 1.609270000  |
| H | 4.339073000  | 0.417831000  | 0.528828000  |
| H | 3.215783000  | 0.272562000  | 1.901019000  |
| H | 4.612799000  | -0.807209000 | 1.781752000  |
| C | 8.161516000  | 3.361282000  | 1.639017000  |
| H | 7.979190000  | 4.441898000  | 1.535155000  |
| H | 8.301894000  | 2.943516000  | 0.635254000  |
| H | 9.099058000  | 3.241749000  | 2.201995000  |
| C | 5.530008000  | 2.768082000  | 5.845418000  |
| H | 5.933899000  | 1.982754000  | 6.504512000  |
| H | 4.469919000  | 2.892255000  | 6.104953000  |
| H | 6.048386000  | 3.708702000  | 6.078782000  |
| C | -2.424293000 | -4.050328000 | 1.641679000  |
| C | -3.763775000 | -4.482006000 | 1.641023000  |
| C | -1.210113000 | -4.841463000 | 1.303434000  |
| C | -5.450127000 | -6.510127000 | 2.139492000  |
| C | -6.623463000 | -7.066221000 | 1.547465000  |
| C | -7.604702000 | -7.644276000 | 2.348767000  |
| H | -8.502997000 | -8.050352000 | 1.879109000  |
| C | -7.479978000 | -7.696500000 | 3.735547000  |
| C | -6.322095000 | -7.158183000 | 4.315170000  |
| H | -6.200835000 | -7.213152000 | 5.399167000  |
| C | -5.323575000 | -6.563764000 | 3.553670000  |
| C | -6.842945000 | -7.005695000 | 0.065593000  |
| H | -6.714498000 | -5.979977000 | -0.311216000 |
| H | -7.853237000 | -7.351856000 | -0.195857000 |
| H | -6.111659000 | -7.628420000 | -0.479827000 |
| C | -8.555765000 | -8.288079000 | 4.594275000  |
| H | -8.140913000 | -9.036212000 | 5.288166000  |
| H | -9.331814000 | -8.772611000 | 3.986472000  |
| H | -9.038291000 | -7.506003000 | 5.203687000  |
| C | -4.097319000 | -6.044424000 | 4.253965000  |
| H | -3.177473000 | -6.350492000 | 3.736167000  |
| H | -4.054666000 | -6.420644000 | 5.285555000  |
| H | -4.092127000 | -4.944302000 | 4.294768000  |
| B | 3.835978000  | 0.665017000  | 4.570838000  |
| B | -4.352110000 | -5.870634000 | 1.248223000  |
| F | -6.282600000 | -1.823145000 | 2.169792000  |

|    |              |              |              |
|----|--------------|--------------|--------------|
| F  | -6.652433000 | -3.786602000 | 1.268575000  |
| F  | -6.305752000 | -3.614321000 | 3.423447000  |
| N  | -3.597591000 | -2.269137000 | 2.166155000  |
| C  | -4.453077000 | -3.309213000 | 1.992957000  |
| C  | -5.915120000 | -3.141957000 | 2.209110000  |
| C  | -3.833347000 | -6.524101000 | -0.065689000 |
| C  | -3.434632000 | -7.893426000 | -0.089185000 |
| C  | -2.980504000 | -8.464647000 | -1.273537000 |
| H  | -2.667118000 | -9.510716000 | -1.274049000 |
| C  | -2.902984000 | -7.729368000 | -2.458885000 |
| C  | -3.318790000 | -6.390171000 | -2.439245000 |
| H  | -3.298694000 | -5.812412000 | -3.365647000 |
| C  | -3.770647000 | -5.780973000 | -1.277180000 |
| C  | -3.489888000 | -8.724748000 | 1.157523000  |
| H  | -2.934874000 | -8.246912000 | 1.979054000  |
| H  | -3.068044000 | -9.723504000 | 0.985231000  |
| H  | -4.527909000 | -8.842069000 | 1.514466000  |
| C  | -2.370427000 | -8.337893000 | -3.718425000 |
| H  | -2.975674000 | -8.041684000 | -4.587323000 |
| H  | -2.355512000 | -9.434067000 | -3.660229000 |
| H  | -1.339133000 | -7.993110000 | -3.902826000 |
| C  | -4.281193000 | -4.373119000 | -1.351521000 |
| H  | -5.250899000 | -4.279918000 | -0.842829000 |
| H  | -4.408412000 | -4.055022000 | -2.394419000 |
| H  | -3.601313000 | -3.659939000 | -0.861478000 |
| Cu | -3.895853000 | -0.391726000 | 1.921198000  |
| F  | -1.081597000 | 4.216387000  | 1.877105000  |
| F  | -2.510584000 | 5.085711000  | 3.292053000  |
| F  | -2.524948000 | 5.714439000  | 1.186150000  |
| F  | -7.358208000 | 2.489142000  | 1.182373000  |
| F  | -6.528901000 | 1.841956000  | -0.731659000 |
| F  | -6.506509000 | 0.474115000  | 0.971355000  |
| N  | -3.013307000 | 2.274065000  | 1.954642000  |
| N  | -4.065308000 | 1.490133000  | 1.589287000  |
| C  | -3.336103000 | 3.559276000  | 1.686569000  |
| C  | -4.608601000 | 3.646650000  | 1.109416000  |
| C  | -5.014167000 | 2.301137000  | 1.057357000  |
| C  | -2.372736000 | 4.649476000  | 2.007771000  |
| C  | -6.341338000 | 1.778378000  | 0.607394000  |
| C  | -5.969475000 | 4.848849000  | -0.814590000 |
| C  | -7.332777000 | 5.145677000  | -1.053543000 |
| C  | -7.848325000 | 5.006181000  | -2.339370000 |
| H  | -8.907656000 | 5.211981000  | -2.509210000 |
| C  | -7.046036000 | 4.626736000  | -3.417750000 |
| C  | -5.697430000 | 4.377444000  | -3.181858000 |
| H  | -5.053816000 | 4.105278000  | -4.019532000 |
| C  | -5.152706000 | 4.465816000  | -1.901394000 |
| C  | -8.250604000 | 5.603377000  | 0.049385000  |
| H  | -8.212623000 | 4.933788000  | 0.920300000  |
| H  | -9.290070000 | 5.638931000  | -0.304797000 |
| H  | -7.976804000 | 6.607743000  | 0.408365000  |
| C  | -7.618677000 | 4.519492000  | -4.800747000 |
| H  | -7.955028000 | 5.505371000  | -5.160324000 |
| H  | -8.490088000 | 3.848078000  | -4.815207000 |
| H  | -6.870274000 | 4.137932000  | -5.508873000 |
| C  | -3.677118000 | 4.209147000  | -1.735261000 |
| H  | -3.224849000 | 4.842780000  | -0.962821000 |
| H  | -3.146948000 | 4.405730000  | -2.673835000 |
| H  | -3.482788000 | 3.160580000  | -1.457676000 |
| C  | -5.539786000 | 6.142349000  | 1.552418000  |
| C  | -5.835023000 | 5.995660000  | 2.931600000  |
| C  | -6.027382000 | 7.127340000  | 3.723582000  |
| H  | -6.280527000 | 6.997534000  | 4.777532000  |

|    |              |              |               |
|----|--------------|--------------|---------------|
| C  | -5.907570000 | 8.415618000  | 3.208761000   |
| C  | -5.590596000 | 8.556321000  | 1.858108000   |
| H  | -5.477937000 | 9.559288000  | 1.440914000   |
| C  | -5.418158000 | 7.455745000  | 1.023075000   |
| C  | -6.002789000 | 4.652685000  | 3.595303000   |
| H  | -6.520812000 | 4.769238000  | 4.557765000   |
| H  | -5.027683000 | 4.183395000  | 3.797147000   |
| H  | -6.585483000 | 3.952854000  | 2.984931000   |
| C  | -6.078951000 | 9.619236000  | 4.087746000   |
| H  | -5.103470000 | 9.939347000  | 4.489812000   |
| H  | -6.737401000 | 9.400915000  | 4.939942000   |
| H  | -6.502104000 | 10.463996000 | 3.527747000   |
| C  | -5.069921000 | 7.719292000  | -0.418644000  |
| H  | -5.899716000 | 7.468112000  | -1.094696000  |
| H  | -4.204102000 | 7.128025000  | -0.745848000  |
| H  | -4.825336000 | 8.779930000  | -0.559895000  |
| B  | -5.380997000 | 4.912882000  | 0.621937000   |
| Cu | 1.378271000  | -1.511069000 | -2.595227000  |
| Cu | 0.880502000  | 1.663941000  | -2.636538000  |
| F  | -0.390234000 | -3.492925000 | -4.189386000  |
| F  | -1.583418000 | -3.375137000 | -2.358770000  |
| F  | -2.571947000 | -3.380227000 | -4.321945000  |
| F  | -3.360172000 | 2.320775000  | -4.165341000  |
| F  | -1.859617000 | 2.271690000  | -5.764109000  |
| F  | -1.324843000 | 3.058564000  | -3.798195000  |
| F  | 0.073779000  | 4.256546000  | -1.799475000  |
| F  | 1.263930000  | 6.101452000  | -1.806124000  |
| F  | 1.029730000  | 4.943661000  | 0.038817000   |
| N  | -0.245843000 | -0.825187000 | -3.326625000  |
| N  | -0.396214000 | 0.513310000  | -3.499752000  |
| N  | 2.330951000  | 2.741231000  | -1.973187000  |
| C  | -1.407613000 | -1.426978000 | -3.674402000  |
| C  | -2.352682000 | -0.483226000 | -4.108786000  |
| C  | -1.635694000 | 0.724604000  | -3.998268000  |
| C  | -1.497695000 | -2.912801000 | -3.635651000  |
| C  | -2.050448000 | 2.086541000  | -4.430000000  |
| C  | -4.299866000 | 0.061999000  | -5.864982000  |
| C  | -5.494179000 | 0.827334000  | -5.873580000  |
| C  | -5.856760000 | 1.516734000  | -7.031200000  |
| H  | -6.765142000 | 2.122145000  | -7.019969000  |
| C  | -5.102164000 | 1.449093000  | -8.200633000  |
| C  | -3.948458000 | 0.664242000  | -8.194685000  |
| H  | -3.353874000 | 0.582310000  | -9.107891000  |
| C  | -3.530480000 | -0.011164000 | -7.052015000  |
| C  | -6.382958000 | 0.970649000  | -4.665838000  |
| H  | -5.824265000 | 1.293880000  | -3.776171000  |
| H  | -7.159986000 | 1.722363000  | -4.852987000  |
| H  | -6.882716000 | 0.023895000  | -4.409733000  |
| C  | -5.508842000 | 2.199857000  | -9.434565000  |
| H  | -5.635986000 | 1.516198000  | -10.286919000 |
| H  | -6.454316000 | 2.736287000  | -9.282278000  |
| H  | -4.738901000 | 2.935788000  | -9.711723000  |
| C  | -2.277365000 | -0.846313000 | -7.138070000  |
| H  | -2.400456000 | -1.828441000 | -6.659410000  |
| H  | -2.002977000 | -1.019143000 | -8.188982000  |
| H  | -1.426522000 | -0.346681000 | -6.647249000  |
| C  | -4.866128000 | -1.484176000 | -3.737522000  |
| C  | -5.098708000 | -1.214884000 | -2.370732000  |
| C  | -6.180797000 | -1.801449000 | -1.713390000  |
| H  | -6.363024000 | -1.554943000 | -0.666626000  |
| C  | -7.022111000 | -2.702608000 | -2.356731000  |
| C  | -6.755034000 | -3.013023000 | -3.692591000  |
| H  | -7.385559000 | -3.744863000 | -4.203661000  |

|   |              |              |              |
|---|--------------|--------------|--------------|
| C | -5.718142000 | -2.409487000 | -4.394532000 |
| C | -4.266875000 | -0.224569000 | -1.609270000 |
| H | -4.339073000 | -0.417831000 | -0.528828000 |
| H | -3.215783000 | -0.272562000 | -1.901019000 |
| H | -4.612799000 | 0.807209000  | -1.781752000 |
| C | -8.161516000 | -3.361282000 | -1.639017000 |
| H | -7.979190000 | -4.441898000 | -1.535155000 |
| H | -8.301894000 | -2.943516000 | -0.635254000 |
| H | -9.099058000 | -3.241749000 | -2.201995000 |
| C | -5.530008000 | -2.768082000 | -5.845418000 |
| H | -5.933899000 | -1.982754000 | -6.504512000 |
| H | -4.469919000 | -2.892255000 | -6.104953000 |
| H | -6.048386000 | -3.708702000 | -6.078782000 |
| C | 2.424293000  | 4.050328000  | -1.641679000 |
| C | 3.763775000  | 4.482006000  | -1.641023000 |
| C | 1.210113000  | 4.841463000  | -1.303434000 |
| C | 5.450127000  | 6.510127000  | -2.139492000 |
| C | 6.623463000  | 7.066221000  | -1.547465000 |
| C | 7.604702000  | 7.644276000  | -2.348767000 |
| H | 8.502997000  | 8.050352000  | -1.879109000 |
| C | 7.479978000  | 7.696500000  | -3.735547000 |
| C | 6.322095000  | 7.158183000  | -4.315170000 |
| H | 6.200835000  | 7.213152000  | -5.399167000 |
| C | 5.323575000  | 6.563764000  | -3.553670000 |
| C | 6.842945000  | 7.005695000  | -0.065593000 |
| H | 6.714498000  | 5.979977000  | 0.311216000  |
| H | 7.853237000  | 7.351856000  | 0.195857000  |
| H | 6.111659000  | 7.628420000  | 0.479827000  |
| C | 8.555765000  | 8.288079000  | -4.594275000 |
| H | 8.140913000  | 9.036212000  | -5.288166000 |
| H | 9.331814000  | 8.772611000  | -3.986472000 |
| H | 9.038291000  | 7.506003000  | -5.203687000 |
| C | 4.097319000  | 6.044424000  | -4.253965000 |
| H | 3.177473000  | 6.350492000  | -3.736167000 |
| H | 4.054666000  | 6.420644000  | -5.285555000 |
| H | 4.092127000  | 4.944302000  | -4.294768000 |
| B | -3.835978000 | -0.665017000 | -4.570838000 |
| B | 4.352110000  | 5.870634000  | -1.248223000 |
| F | 6.282600000  | 1.823145000  | -2.169792000 |
| F | 6.652433000  | 3.786602000  | -1.268575000 |
| F | 6.305752000  | 3.614321000  | -3.423447000 |
| N | 3.597591000  | 2.269137000  | -2.166155000 |
| C | 4.453077000  | 3.309213000  | -1.992957000 |
| C | 5.915120000  | 3.141957000  | -2.209110000 |
| C | 3.833347000  | 6.524101000  | 0.065689000  |
| C | 3.434632000  | 7.893426000  | 0.089185000  |
| C | 2.980504000  | 8.464647000  | 1.273537000  |
| H | 2.667118000  | 9.510716000  | 1.274049000  |
| C | 2.902984000  | 7.729368000  | 2.458885000  |
| C | 3.318790000  | 6.390171000  | 2.439245000  |
| H | 3.298694000  | 5.812412000  | 3.365647000  |
| C | 3.770647000  | 5.780973000  | 1.277180000  |
| C | 3.489888000  | 8.724748000  | -1.157523000 |
| H | 2.934874000  | 8.246912000  | -1.979054000 |
| H | 3.068044000  | 9.723504000  | -0.985231000 |
| H | 4.527909000  | 8.842069000  | -1.514466000 |
| C | 2.370427000  | 8.337893000  | 3.718425000  |
| H | 2.975674000  | 8.041684000  | 4.587323000  |
| H | 2.355512000  | 9.434067000  | 3.660229000  |
| H | 1.339133000  | 7.993110000  | 3.902826000  |
| C | 4.281193000  | 4.373119000  | 1.351521000  |
| H | 5.250899000  | 4.279918000  | 0.842829000  |
| H | 4.408412000  | 4.055022000  | 2.394419000  |

|    |              |               |              |
|----|--------------|---------------|--------------|
| H  | 3.601313000  | 3.659939000   | 0.861478000  |
| Cu | 3.895853000  | 0.391726000   | -1.921198000 |
| F  | 1.081597000  | -4.216387000  | -1.877105000 |
| F  | 2.510584000  | -5.085711000  | -3.292053000 |
| F  | 2.524948000  | -5.714439000  | -1.186150000 |
| F  | 7.358208000  | -2.489142000  | -1.182373000 |
| F  | 6.528901000  | -1.841956000  | 0.731659000  |
| F  | 6.506509000  | -0.474115000  | -0.971355000 |
| N  | 3.013307000  | -2.274065000  | -1.954642000 |
| N  | 4.065308000  | -1.490133000  | -1.589287000 |
| C  | 3.336103000  | -3.559276000  | -1.686569000 |
| C  | 4.608601000  | -3.646650000  | -1.109416000 |
| C  | 5.014167000  | -2.301137000  | -1.057357000 |
| C  | 2.372736000  | -4.649476000  | -2.007771000 |
| C  | 6.341338000  | -1.778378000  | -0.607394000 |
| C  | 5.969475000  | -4.848849000  | 0.814590000  |
| C  | 7.332777000  | -5.145677000  | 1.053543000  |
| C  | 7.848325000  | -5.006181000  | 2.339370000  |
| H  | 8.907656000  | -5.211981000  | 2.509210000  |
| C  | 7.046036000  | -4.626736000  | 3.417750000  |
| C  | 5.697430000  | -4.377444000  | 3.181858000  |
| H  | 5.053816000  | -4.105278000  | 4.019532000  |
| C  | 5.152706000  | -4.465816000  | 1.901394000  |
| C  | 8.250604000  | -5.603377000  | -0.049385000 |
| H  | 8.212623000  | -4.933788000  | -0.920300000 |
| H  | 9.290070000  | -5.638931000  | 0.304797000  |
| H  | 7.976804000  | -6.607743000  | -0.408365000 |
| C  | 7.618677000  | -4.519492000  | 4.800747000  |
| H  | 7.955028000  | -5.505371000  | 5.160324000  |
| H  | 8.490088000  | -3.848078000  | 4.815207000  |
| H  | 6.870274000  | -4.137932000  | 5.508873000  |
| C  | 3.677118000  | -4.209147000  | 1.735261000  |
| H  | 3.224849000  | -4.842780000  | 0.962821000  |
| H  | 3.146948000  | -4.405730000  | 2.673835000  |
| H  | 3.482788000  | -3.160580000  | 1.457676000  |
| C  | 5.539786000  | -6.142349000  | -1.552418000 |
| C  | 5.835023000  | -5.995660000  | -2.931600000 |
| C  | 6.027382000  | -7.127340000  | -3.723582000 |
| H  | 6.280527000  | -6.997534000  | -4.777532000 |
| C  | 5.907570000  | -8.415618000  | -3.208761000 |
| C  | 5.590596000  | -8.556321000  | -1.858108000 |
| H  | 5.477937000  | -9.559288000  | -1.440914000 |
| C  | 5.418158000  | -7.455745000  | -1.023075000 |
| C  | 6.002789000  | -4.652685000  | -3.595303000 |
| H  | 6.520812000  | -4.769238000  | -4.557765000 |
| H  | 5.027683000  | -4.183395000  | -3.797147000 |
| H  | 6.585483000  | -3.952854000  | -2.984931000 |
| C  | 6.078951000  | -9.619236000  | -4.087746000 |
| H  | 5.103470000  | -9.939347000  | -4.489812000 |
| H  | 6.737401000  | -9.400915000  | -4.939942000 |
| H  | 6.502104000  | -10.463996000 | -3.527747000 |
| C  | 5.069921000  | -7.719292000  | 0.418644000  |
| H  | 5.899716000  | -7.468112000  | 1.094696000  |
| H  | 4.204102000  | -7.128025000  | 0.745848000  |
| H  | 4.825336000  | -8.779930000  | 0.559895000  |
| B  | 5.380997000  | -4.912882000  | -0.621937000 |
| C  | -0.099137000 | 1.392004000   | -0.008108000 |
| H  | -0.181239000 | 2.479119000   | 0.006619000  |
| C  | 1.126473000  | 0.780641000   | 0.278245000  |
| H  | 1.992447000  | 1.401721000   | 0.501128000  |
| C  | 1.225734000  | -0.608861000  | 0.285397000  |
| H  | 2.174592000  | -1.093782000  | 0.508831000  |
| C  | 0.099137000  | -1.392004000  | 0.008108000  |

|   |              |              |              |
|---|--------------|--------------|--------------|
| H | 0.181239000  | -2.479119000 | -0.006619000 |
| C | -1.126473000 | -0.780641000 | -0.278245000 |
| H | -1.992447000 | -1.401721000 | -0.501128000 |
| C | -1.225734000 | 0.608861000  | -0.285397000 |
| H | -2.174592000 | 1.093782000  | -0.508831000 |

330

Cu<sub>3</sub>CH<sub>3</sub>-Cu<sub>3</sub>CH<sub>3</sub> dimer

|    |               |              |             |
|----|---------------|--------------|-------------|
| Cu | 0.907986000   | -1.973616000 | 1.486014000 |
| Cu | -1.017844000  | 0.626067000  | 1.084553000 |
| Cu | 2.163258000   | 0.971178000  | 1.240034000 |
| N  | -0.946373000  | -2.090743000 | 1.875889000 |
| N  | -1.788578000  | -1.056507000 | 1.490926000 |
| N  | -0.301972000  | 2.374929000  | 1.227876000 |
| N  | 1.065189000   | 2.505802000  | 1.392980000 |
| N  | 3.328074000   | -0.515328000 | 1.415637000 |
| N  | 2.797087000   | -1.797596000 | 1.431703000 |
| C  | -1.673944000  | -3.020897000 | 2.502179000 |
| C  | -3.039322000  | -2.609692000 | 2.538656000 |
| C  | -3.033990000  | -1.337390000 | 1.911777000 |
| C  | -1.004953000  | -4.183156000 | 3.144522000 |
| H  | -1.334968000  | -4.284014000 | 4.189178000 |
| H  | 0.085017000   | -4.042330000 | 3.133682000 |
| H  | -1.239713000  | -5.131286000 | 2.646094000 |
| C  | -4.119715000  | -0.340972000 | 1.748065000 |
| H  | -5.067342000  | -0.820175000 | 1.470150000 |
| H  | -3.853978000  | 0.400599000  | 0.984559000 |
| H  | -4.295544000  | 0.191371000  | 2.695736000 |
| C  | -4.038753000  | -4.939144000 | 3.266891000 |
| C  | -3.641932000  | -5.763558000 | 2.188846000 |
| C  | -3.363970000  | -7.112354000 | 2.404325000 |
| H  | -3.078368000  | -7.738731000 | 1.555544000 |
| C  | -3.435328000  | -7.684919000 | 3.676493000 |
| C  | -3.834233000  | -6.870121000 | 4.736345000 |
| H  | -3.906381000  | -7.296931000 | 5.740121000 |
| C  | -4.149625000  | -5.519781000 | 4.547990000 |
| C  | -3.493273000  | -5.226429000 | 0.792046000 |
| H  | -2.471535000  | -4.855137000 | 0.608746000 |
| H  | -4.166010000  | -4.382184000 | 0.600018000 |
| H  | -3.704994000  | -6.011176000 | 0.051476000 |
| C  | -3.120689000  | -9.139919000 | 3.881338000 |
| H  | -3.907680000  | -9.774399000 | 3.442266000 |
| H  | -3.045981000  | -9.384113000 | 4.948601000 |
| H  | -2.172375000  | -9.412032000 | 3.395240000 |
| C  | -4.547054000  | -4.691095000 | 5.740963000 |
| H  | -3.763246000  | -3.957762000 | 5.989807000 |
| H  | -4.706003000  | -5.323437000 | 6.625791000 |
| H  | -5.468939000  | -4.125257000 | 5.540502000 |
| C  | -5.586334000  | -2.659157000 | 3.392616000 |
| C  | -5.640503000  | -1.577831000 | 4.307550000 |
| C  | -6.848479000  | -0.922204000 | 4.548083000 |
| H  | -6.865935000  | -0.089036000 | 5.256114000 |
| C  | -8.033583000  | -1.304008000 | 3.918104000 |
| C  | -7.980145000  | -2.370313000 | 3.022228000 |
| H  | -8.890854000  | -2.682849000 | 2.507158000 |
| C  | -6.787910000  | -3.046191000 | 2.752047000 |
| C  | -4.442792000  | -1.136987000 | 5.107023000 |
| H  | -4.508172000  | -0.067466000 | 5.349284000 |
| H  | -3.497064000  | -1.329891000 | 4.588058000 |
| H  | -4.404280000  | -1.682781000 | 6.064318000 |
| C  | -9.322454000  | -0.591370000 | 4.210708000 |
| H  | -10.103921000 | -0.857020000 | 3.486725000 |
| H  | -9.185350000  | 0.500233000  | 4.194278000 |
| H  | -9.694477000  | -0.857825000 | 5.213335000 |

|   |              |              |              |
|---|--------------|--------------|--------------|
| C | -6.813792000 | -4.140150000 | 1.718321000  |
| H | -7.844304000 | -4.461976000 | 1.512832000  |
| H | -6.231215000 | -5.014821000 | 2.040699000  |
| H | -6.382647000 | -3.786152000 | 0.767205000  |
| C | -0.888377000 | 3.549770000  | 1.513868000  |
| C | 0.114043000  | 4.493711000  | 1.866727000  |
| C | 1.326706000  | 3.751490000  | 1.804873000  |
| C | -2.372051000 | 3.636982000  | 1.591373000  |
| H | -2.836412000 | 2.835406000  | 1.000000000  |
| H | -2.749185000 | 4.606175000  | 1.241351000  |
| H | -2.695329000 | 3.515399000  | 2.639731000  |
| C | 2.722999000  | 4.132969000  | 2.144436000  |
| H | 2.949042000  | 3.875192000  | 3.192648000  |
| H | 2.888744000  | 5.210729000  | 2.030213000  |
| H | 3.431350000  | 3.589515000  | 1.503657000  |
| C | 1.024301000  | 6.740365000  | 2.978577000  |
| C | 1.711133000  | 7.868616000  | 2.475426000  |
| C | 2.722843000  | 8.467683000  | 3.230697000  |
| H | 3.251349000  | 9.331263000  | 2.819028000  |
| C | 3.066410000  | 7.998986000  | 4.498694000  |
| C | 2.359995000  | 6.906262000  | 5.006941000  |
| H | 2.593503000  | 6.542176000  | 6.010728000  |
| C | 1.362265000  | 6.268419000  | 4.270416000  |
| C | 1.416522000  | 8.423280000  | 1.106513000  |
| H | 1.789207000  | 7.743972000  | 0.321422000  |
| H | 1.908185000  | 9.396442000  | 0.962931000  |
| H | 0.333977000  | 8.541502000  | 0.944561000  |
| C | 4.168274000  | 8.644094000  | 5.289112000  |
| H | 3.972575000  | 8.584338000  | 6.368437000  |
| H | 4.290734000  | 9.700240000  | 5.011436000  |
| H | 5.127637000  | 8.135912000  | 5.098120000  |
| C | 0.646130000  | 5.102075000  | 4.903961000  |
| H | -0.436934000 | 5.138253000  | 4.724412000  |
| H | 0.814686000  | 5.091668000  | 5.989897000  |
| H | 0.998627000  | 4.142091000  | 4.497788000  |
| C | -1.304711000 | 6.694549000  | 1.502033000  |
| C | -1.518899000 | 6.650690000  | 0.105297000  |
| C | -2.685464000 | 7.184856000  | -0.438245000 |
| H | -2.834625000 | 7.146213000  | -1.520250000 |
| C | -3.682507000 | 7.741959000  | 0.364517000  |
| C | -3.461226000 | 7.793934000  | 1.740691000  |
| H | -4.224698000 | 8.231709000  | 2.389358000  |
| C | -2.286736000 | 7.298416000  | 2.314568000  |
| C | -0.509519000 | 6.039305000  | -0.828064000 |
| H | -0.475428000 | 4.943050000  | -0.731534000 |
| H | 0.510925000  | 6.390763000  | -0.615108000 |
| H | -0.745188000 | 6.288100000  | -1.871785000 |
| C | -4.937273000 | 8.292795000  | -0.247262000 |
| H | -5.794333000 | 8.180551000  | 0.429578000  |
| H | -5.168350000 | 7.773247000  | -1.184026000 |
| H | -4.826404000 | 9.366735000  | -0.471859000 |
| C | -2.128246000 | 7.357254000  | 3.810797000  |
| H | -2.328822000 | 6.372184000  | 4.265202000  |
| H | -2.832884000 | 8.074418000  | 4.254018000  |
| H | -1.105642000 | 7.647719000  | 4.093129000  |
| C | 4.665053000  | -0.602822000 | 1.432691000  |
| C | 5.041734000  | -1.974612000 | 1.486451000  |
| C | 3.806489000  | -2.676439000 | 1.500337000  |
| C | 5.485503000  | 0.639668000  | 1.453593000  |
| H | 4.824882000  | 1.520612000  | 1.453016000  |
| H | 6.156948000  | 0.703515000  | 0.585130000  |
| H | 6.119976000  | 0.681076000  | 2.353389000  |
| C | 3.521810000  | -4.133476000 | 1.530101000  |

|    |              |              |              |
|----|--------------|--------------|--------------|
| H  | 4.208204000  | -4.692349000 | 0.878477000  |
| H  | 2.493285000  | -4.318198000 | 1.195933000  |
| H  | 3.631532000  | -4.551048000 | 2.542956000  |
| C  | 6.638968000  | -3.996713000 | 2.137951000  |
| C  | 6.119556000  | -4.324183000 | 3.413660000  |
| C  | 6.194986000  | -5.636121000 | 3.883360000  |
| H  | 5.789866000  | -5.869233000 | 4.872841000  |
| C  | 6.771332000  | -6.657015000 | 3.126160000  |
| C  | 7.313613000  | -6.323651000 | 1.885174000  |
| H  | 7.780269000  | -7.103828000 | 1.279576000  |
| C  | 7.262336000  | -5.020484000 | 1.387473000  |
| C  | 5.483273000  | -3.298378000 | 4.319097000  |
| H  | 4.383308000  | -3.382157000 | 4.302687000  |
| H  | 5.727675000  | -2.271203000 | 4.029494000  |
| H  | 5.806093000  | -3.454697000 | 5.359644000  |
| C  | 6.823390000  | -8.065572000 | 3.645968000  |
| H  | 7.548745000  | -8.148440000 | 4.472801000  |
| H  | 7.124323000  | -8.771078000 | 2.859803000  |
| H  | 5.844401000  | -8.377339000 | 4.039091000  |
| C  | 7.822106000  | -4.753510000 | 0.016731000  |
| H  | 8.425233000  | -5.601959000 | -0.335213000 |
| H  | 8.447383000  | -3.849434000 | 0.011725000  |
| H  | 7.011858000  | -4.595735000 | -0.711988000 |
| C  | 7.613139000  | -1.644438000 | 1.026557000  |
| C  | 8.544574000  | -1.119698000 | 1.950511000  |
| C  | 9.451058000  | -0.133204000 | 1.551451000  |
| H  | 10.145649000 | 0.278918000  | 2.288623000  |
| C  | 9.481175000  | 0.345041000  | 0.240768000  |
| C  | 8.591741000  | -0.213089000 | -0.677290000 |
| H  | 8.600180000  | 0.134376000  | -1.709080000 |
| C  | 7.662304000  | -1.185180000 | -0.309390000 |
| C  | 8.530435000  | -1.551591000 | 3.394168000  |
| H  | 7.702834000  | -1.070209000 | 3.941016000  |
| H  | 9.464882000  | -1.270540000 | 3.900613000  |
| H  | 8.393664000  | -2.639234000 | 3.485839000  |
| C  | 10.419187000 | 1.445823000  | -0.165013000 |
| H  | 9.916262000  | 2.424462000  | -0.091275000 |
| H  | 10.756358000 | 1.322581000  | -1.204371000 |
| H  | 11.305803000 | 1.477854000  | 0.485160000  |
| C  | 6.766088000  | -1.739147000 | -1.384952000 |
| H  | 6.568718000  | -0.978830000 | -2.153764000 |
| H  | 5.807913000  | -2.093134000 | -0.981696000 |
| H  | 7.251286000  | -2.593476000 | -1.886083000 |
| B  | -4.232963000 | -3.389659000 | 3.070221000  |
| B  | -0.053058000 | 5.984463000  | 2.129249000  |
| B  | 6.446576000  | -2.560171000 | 1.540002000  |
| Cu | -0.856389529 | 2.103750843  | -1.496996337 |
| Cu | 1.069440471  | -0.495932157 | -1.095535337 |
| Cu | -2.111661529 | -0.841043157 | -1.251016337 |
| N  | 0.997969471  | 2.220877843  | -1.886871337 |
| N  | 1.840174471  | 1.186641843  | -1.501908337 |
| N  | 0.353568471  | -2.244794157 | -1.238858337 |
| N  | -1.013592529 | -2.375667157 | -1.403962337 |
| N  | -3.276477529 | 0.645462843  | -1.426619337 |
| N  | -2.745490529 | 1.927730843  | -1.442685337 |
| C  | 1.725540471  | 3.151031843  | -2.513161337 |
| C  | 3.090918471  | 2.739826843  | -2.549638337 |
| C  | 3.085586471  | 1.467524843  | -1.922759337 |
| C  | 1.056549471  | 4.313290843  | -3.155504337 |
| H  | 1.386564471  | 4.414148843  | -4.200160337 |
| H  | -0.033420529 | 4.172464843  | -3.144664337 |
| H  | 1.291309471  | 5.261420843  | -2.657076337 |
| C  | 4.171311471  | 0.471106843  | -1.759047337 |



|   |              |              |              |
|---|--------------|--------------|--------------|
| H | 5.118938471  | 0.950309843  | -1.481132337 |
| H | 3.905574471  | -0.270464157 | -0.995541337 |
| H | 4.347140471  | -0.061236157 | -2.706718337 |
| C | 4.090349471  | 5.069278843  | -3.277873337 |
| C | 3.693528471  | 5.893692843  | -2.199828337 |
| C | 3.415566471  | 7.242488843  | -2.415307337 |
| H | 3.129964471  | 7.868865843  | -1.566526337 |
| C | 3.486924471  | 7.815053843  | -3.687475337 |
| C | 3.885829471  | 7.000255843  | -4.747327337 |
| H | 3.957977471  | 7.427065843  | -5.751103337 |
| C | 4.201221471  | 5.649915843  | -4.558972337 |
| C | 3.544869471  | 5.356563843  | -0.803028337 |
| H | 2.523131471  | 4.985271843  | -0.619728337 |
| H | 4.217606471  | 4.512318843  | -0.611000337 |
| H | 3.756590471  | 6.141310843  | -0.062458337 |
| C | 3.172285471  | 9.270053843  | -3.892320337 |
| H | 3.959276471  | 9.904533843  | -3.453248337 |
| H | 3.097577471  | 9.514247843  | -4.959583337 |
| H | 2.223971471  | 9.542166843  | -3.406222337 |
| C | 4.598650471  | 4.821229843  | -5.751945337 |
| H | 3.814842471  | 4.087896843  | -6.000789337 |
| H | 4.757599471  | 5.453571843  | -6.636773337 |
| H | 5.520535471  | 4.255391843  | -5.551484337 |
| C | 5.637930471  | 2.789291843  | -3.403598337 |
| C | 5.692099471  | 1.707965843  | -4.318532337 |
| C | 6.900075471  | 1.052338843  | -4.559065337 |
| H | 6.917531471  | 0.219170843  | -5.267096337 |
| C | 8.085179471  | 1.434142843  | -3.929086337 |
| C | 8.031741471  | 2.500447843  | -3.033210337 |
| H | 8.942450471  | 2.812983843  | -2.518140337 |
| C | 6.839506471  | 3.176325843  | -2.763029337 |
| C | 4.494388471  | 1.267121843  | -5.118005337 |
| H | 4.559768471  | 0.197600843  | -5.360266337 |
| H | 3.548660471  | 1.460025843  | -4.599040337 |
| H | 4.455876471  | 1.812915843  | -6.075300337 |
| C | 9.374050471  | 0.721504843  | -4.221690337 |
| H | 10.155517471 | 0.987154843  | -3.497707337 |
| H | 9.236946471  | -0.370098157 | -4.205260337 |
| H | 9.746073471  | 0.987959843  | -5.224317337 |
| C | 6.865388471  | 4.270284843  | -1.729303337 |
| H | 7.895900471  | 4.592110843  | -1.523814337 |
| H | 6.282811471  | 5.144955843  | -2.051681337 |
| H | 6.434243471  | 3.916286843  | -0.778187337 |
| C | 0.939973471  | -3.419635157 | -1.524850337 |
| C | -0.062446529 | -4.363576157 | -1.877709337 |
| C | -1.275109529 | -3.621355157 | -1.815855337 |
| C | 2.423647471  | -3.506847157 | -1.602355337 |
| H | 2.888008471  | -2.705271157 | -1.010982337 |
| H | 2.800781471  | -4.476040157 | -1.252333337 |
| H | 2.746925471  | -3.385264157 | -2.650713337 |
| C | -2.671402529 | -4.002834157 | -2.155418337 |
| H | -2.897445529 | -3.745057157 | -3.203630337 |
| H | -2.837147529 | -5.080594157 | -2.041195337 |
| H | -3.379753529 | -3.459380157 | -1.514639337 |
| C | -0.972704529 | -6.610230157 | -2.989559337 |
| C | -1.659536529 | -7.738481157 | -2.486408337 |
| C | -2.671246529 | -8.337548157 | -3.241679337 |
| H | -3.199752529 | -9.201128157 | -2.830010337 |
| C | -3.014813529 | -7.868851157 | -4.509676337 |
| C | -2.308398529 | -6.776127157 | -5.017923337 |
| H | -2.541906529 | -6.412041157 | -6.021710337 |
| C | -1.310668529 | -6.138284157 | -4.281398337 |
| C | -1.364925529 | -8.293145157 | -1.117495337 |

|   |              |              |              |
|---|--------------|--------------|--------------|
| H | -1.737610529 | -7.613837157 | -0.332404337 |
| H | -1.856588529 | -9.266307157 | -0.973913337 |
| H | -0.282380529 | -8.411367157 | -0.955543337 |
| C | -4.116677529 | -8.513959157 | -5.300094337 |
| H | -3.920978529 | -8.454203157 | -6.379419337 |
| H | -4.239137529 | -9.570105157 | -5.022418337 |
| H | -5.076040529 | -8.005777157 | -5.109102337 |
| C | -0.594533529 | -4.971940157 | -4.914943337 |
| H | 0.488530471  | -5.008118157 | -4.735394337 |
| H | -0.763089529 | -4.961533157 | -6.000879337 |
| H | -0.947030529 | -4.011956157 | -4.508770337 |
| C | 1.356307471  | -6.564414157 | -1.513015337 |
| C | 1.570495471  | -6.520555157 | -0.116279337 |
| C | 2.737060471  | -7.054721157 | 0.427262663  |
| H | 2.886221471  | -7.016078157 | 1.509267663  |
| C | 3.734103471  | -7.611824157 | -0.375499337 |
| C | 3.512822471  | -7.663799157 | -1.751673337 |
| H | 4.276294471  | -8.101574157 | -2.400340337 |
| C | 2.338332471  | -7.168281157 | -2.325550337 |
| C | 0.561115471  | -5.909170157 | 0.817081663  |
| H | 0.527024471  | -4.812915157 | 0.720551663  |
| H | -0.459328529 | -6.260628157 | 0.604125663  |
| H | 0.796784471  | -6.157965157 | 1.860802663  |
| C | 4.988869471  | -8.162660157 | 0.236279663  |
| H | 5.845929471  | -8.050416157 | -0.440560337 |
| H | 5.219946471  | -7.643112157 | 1.173043663  |
| H | 4.878000471  | -9.236600157 | 0.460876663  |
| C | 2.179842471  | -7.227119157 | -3.821779337 |
| H | 2.380418471  | -6.242049157 | -4.276184337 |
| H | 2.884480471  | -7.944283157 | -4.265000337 |
| H | 1.157238471  | -7.517584157 | -4.104111337 |
| C | -4.613456529 | 0.732956843  | -1.443673337 |
| C | -4.990137529 | 2.104746843  | -1.497433337 |
| C | -3.754892529 | 2.806573843  | -1.511319337 |
| C | -5.433906529 | -0.509533157 | -1.464575337 |
| H | -4.773285529 | -1.390477157 | -1.463998337 |
| H | -6.105351529 | -0.573380157 | -0.596112337 |
| H | -6.068379529 | -0.550941157 | -2.364371337 |
| C | -3.470213529 | 4.263610843  | -1.541083337 |
| H | -4.156607529 | 4.822483843  | -0.889459337 |
| H | -2.441688529 | 4.448332843  | -1.206915337 |
| H | -3.579935529 | 4.681182843  | -2.553938337 |
| C | -6.587371529 | 4.126847843  | -2.148933337 |
| C | -6.067959529 | 4.454317843  | -3.424642337 |
| C | -6.143389529 | 5.766255843  | -3.894342337 |
| H | -5.738269529 | 5.999367843  | -4.883823337 |
| C | -6.719735529 | 6.787149843  | -3.137142337 |
| C | -7.262016529 | 6.453785843  | -1.896156337 |
| H | -7.728672529 | 7.233962843  | -1.290558337 |
| C | -7.210739529 | 5.150618843  | -1.398455337 |
| C | -5.431676529 | 3.428512843  | -4.330079337 |
| H | -4.331711529 | 3.512291843  | -4.313669337 |
| H | -5.676078529 | 2.401337843  | -4.040476337 |
| H | -5.754496529 | 3.584831843  | -5.370626337 |
| C | -6.771793529 | 8.195706843  | -3.656950337 |
| H | -7.497148529 | 8.278574843  | -4.483783337 |
| H | -7.072726529 | 8.901212843  | -2.870785337 |
| H | -5.792804529 | 8.507473843  | -4.050073337 |
| C | -7.770509529 | 4.883644843  | -0.027713337 |
| H | -8.373636529 | 5.732093843  | 0.324230663  |
| H | -8.395786529 | 3.979568843  | -0.022707337 |
| H | -6.960261529 | 4.725869843  | 0.701005663  |
| C | -7.561542529 | 1.774572843  | -1.037539337 |

|   |               |              |              |
|---|---------------|--------------|--------------|
| C | -8.492977529  | 1.249832843  | -1.961493337 |
| C | -9.399461529  | 0.263338843  | -1.562433337 |
| H | -10.094052529 | -0.148783157 | -2.299605337 |
| C | -9.429578529  | -0.214906157 | -0.251750337 |
| C | -8.540144529  | 0.343223843  | 0.666307663  |
| H | -8.548583529  | -0.004241157 | 1.698097663  |
| C | -7.610707529  | 1.315314843  | 0.298407663  |
| C | -8.478838529  | 1.681725843  | -3.405150337 |
| H | -7.651237529  | 1.200343843  | -3.951998337 |
| H | -9.413285529  | 1.400674843  | -3.911595337 |
| H | -8.342067529  | 2.769368843  | -3.496821337 |
| C | -10.367590529 | -1.315688157 | 0.154030663  |
| H | -9.864665529  | -2.294327157 | 0.080292663  |
| H | -10.704761529 | -1.192446157 | 1.193388663  |
| H | -11.254206529 | -1.347719157 | -0.496142337 |
| C | -6.714491529  | 1.869281843  | 1.373969663  |
| H | -6.517121529  | 1.108964843  | 2.142781663  |
| H | -5.756316529  | 2.223268843  | 0.970713663  |
| H | -7.199689529  | 2.723610843  | 1.875100663  |
| B | 4.284559471   | 3.519793843  | -3.081203337 |
| B | 0.104654471   | -5.854328157 | -2.140231337 |
| B | -6.394979529  | 2.690305843  | -1.550984337 |

330

Cu<sub>3</sub>CH<sub>3</sub>-Cu<sub>3</sub>CH<sub>3</sub> dimer T1

|    |              |              |              |
|----|--------------|--------------|--------------|
| Cu | 0.566052000  | -1.972294000 | 1.203650000  |
| Cu | -1.150680000 | 0.538500000  | 0.856752000  |
| Cu | 1.702024000  | 0.980976000  | 0.987965000  |
| N  | -1.175210000 | -2.059401000 | 1.976023000  |
| N  | -1.926712000 | -0.907325000 | 1.893086000  |
| N  | -0.641053000 | 2.363519000  | 1.389734000  |
| N  | 0.720924000  | 2.499083000  | 1.591987000  |
| N  | 2.924593000  | -0.495520000 | 1.071032000  |
| N  | 2.446209000  | -1.756877000 | 1.380781000  |
| C  | -1.908128000 | -3.011447000 | 2.564673000  |
| C  | -3.190905000 | -2.479007000 | 2.883743000  |
| C  | -3.122738000 | -1.125265000 | 2.446969000  |
| C  | -1.293171000 | -4.334840000 | 2.853578000  |
| H  | -1.644239000 | -4.735759000 | 3.814814000  |
| H  | -0.198980000 | -4.231275000 | 2.894261000  |
| H  | -1.539445000 | -5.081048000 | 2.084281000  |
| C  | -4.129031000 | -0.036977000 | 2.500805000  |
| H  | -5.140057000 | -0.423662000 | 2.317381000  |
| H  | -3.898824000 | 0.728740000  | 1.750265000  |
| H  | -4.143547000 | 0.448113000  | 3.489823000  |
| C  | -4.337058000 | -4.805232000 | 3.015665000  |
| C  | -4.084000000 | -5.298188000 | 1.711721000  |
| C  | -3.798928000 | -6.653151000 | 1.518417000  |
| H  | -3.624903000 | -7.021048000 | 0.500087000  |
| C  | -3.706904000 | -7.546736000 | 2.592594000  |
| C  | -3.960999000 | -7.055019000 | 3.877545000  |
| H  | -3.899208000 | -7.736878000 | 4.732168000  |
| C  | -4.288415000 | -5.708518000 | 4.099521000  |
| C  | -4.050187000 | -4.388059000 | 0.508129000  |
| H  | -3.017703000 | -4.058250000 | 0.307874000  |
| H  | -4.651062000 | -3.478809000 | 0.652713000  |
| H  | -4.415781000 | -4.910107000 | -0.389160000 |
| C  | -3.340398000 | -8.989263000 | 2.358650000  |
| H  | -4.044685000 | -9.467656000 | 1.664986000  |
| H  | -3.339532000 | -9.560563000 | 3.299864000  |
| H  | -2.338494000 | -9.073495000 | 1.906499000  |
| C  | -4.498196000 | -5.209000000 | 5.506749000  |
| H  | -3.664885000 | -4.559742000 | 5.817647000  |
| H  | -4.558870000 | -6.042282000 | 6.223677000  |

|   |              |              |              |
|---|--------------|--------------|--------------|
| H | -5.41682000  | -4.604057000 | 5.583874000  |
| C | -5.696993000 | -2.499830000 | 3.830851000  |
| C | -5.590579000 | -1.598544000 | 4.922481000  |
| C | -6.691333000 | -0.834621000 | 5.315549000  |
| H | -6.580694000 | -0.137674000 | 6.150007000  |
| C | -7.928159000 | -0.931701000 | 4.672501000  |
| C | -8.038922000 | -1.835912000 | 3.619412000  |
| H | -8.990999000 | -1.933335000 | 3.099756000  |
| C | -6.958612000 | -2.613175000 | 3.191691000  |
| C | -4.325090000 | -1.459943000 | 5.731296000  |
| H | -4.238843000 | -0.447380000 | 6.148011000  |
| H | -3.429998000 | -1.678977000 | 5.142004000  |
| H | -4.333129000 | -2.162367000 | 6.580965000  |
| C | -9.100095000 | -0.103074000 | 5.119445000  |
| H | -9.880688000 | -0.061595000 | 4.349120000  |
| H | -8.791573000 | 0.925101000  | 5.361393000  |
| H | -9.556504000 | -0.531724000 | 6.027228000  |
| C | -7.170527000 | -3.493132000 | 1.989723000  |
| H | -8.241266000 | -3.687299000 | 1.833748000  |
| H | -6.649367000 | -4.453444000 | 2.091457000  |
| H | -6.795632000 | -3.003331000 | 1.078450000  |
| C | -1.242686000 | 3.523283000  | 1.684937000  |
| C | -0.257218000 | 4.459249000  | 2.110106000  |
| C | 0.963985000  | 3.733345000  | 2.054010000  |
| C | -2.725187000 | 3.621184000  | 1.648150000  |
| H | -3.147779000 | 2.735453000  | 1.157121000  |
| H | -3.066762000 | 4.516410000  | 1.114333000  |
| H | -3.131646000 | 3.672502000  | 2.669695000  |
| C | 2.343070000  | 4.138240000  | 2.426631000  |
| H | 2.458582000  | 4.177017000  | 3.520905000  |
| H | 2.582113000  | 5.138813000  | 2.046466000  |
| H | 3.075120000  | 3.419189000  | 2.032783000  |
| C | 0.582877000  | 6.668697000  | 3.337065000  |
| C | 1.309708000  | 7.816655000  | 2.947475000  |
| C | 2.263635000  | 8.372214000  | 3.806494000  |
| H | 2.825705000  | 9.249409000  | 3.477385000  |
| C | 2.503532000  | 7.845102000  | 5.073677000  |
| C | 1.753871000  | 6.734806000  | 5.473378000  |
| H | 1.903539000  | 6.327155000  | 6.475518000  |
| C | 0.816825000  | 6.135946000  | 4.631982000  |
| C | 1.136843000  | 8.440856000  | 1.588404000  |
| H | 1.695188000  | 7.876429000  | 0.829916000  |
| H | 1.519469000  | 9.467005000  | 1.577843000  |
| H | 0.086225000  | 8.456785000  | 1.281173000  |
| C | 3.538194000  | 8.443841000  | 5.982700000  |
| H | 3.211797000  | 8.408107000  | 7.030744000  |
| H | 3.749908000  | 9.488075000  | 5.714902000  |
| H | 4.482075000  | 7.881104000  | 5.911986000  |
| C | 0.052472000  | 4.947375000  | 5.163539000  |
| H | -1.017573000 | 5.006217000  | 4.926620000  |
| H | 0.158580000  | 4.883811000  | 6.254683000  |
| H | 0.414460000  | 4.002490000  | 4.731525000  |
| C | -1.627448000 | 6.643285000  | 1.650313000  |
| C | -1.701823000 | 6.639871000  | 0.239538000  |
| C | -2.854080000 | 7.102699000  | -0.397820000 |
| H | -2.895172000 | 7.099395000  | -1.488410000 |
| C | -3.964180000 | 7.547768000  | 0.321409000  |
| C | -3.881878000 | 7.554493000  | 1.714470000  |
| H | -4.739547000 | 7.898153000  | 2.298387000  |
| C | -2.729864000 | 7.131463000  | 2.380885000  |
| C | -0.556637000 | 6.147596000  | -0.603546000 |
| H | -0.345705000 | 5.077254000  | -0.415637000 |
| H | 0.381511000  | 6.690708000  | -0.374303000 |

|   |              |              |              |
|---|--------------|--------------|--------------|
| H | -0.773798000 | 6.286102000  | -1.677481000 |
| C | -5.200168000 | 8.027190000  | -0.382719000 |
| H | -6.104835000 | 7.608919000  | 0.080590000  |
| H | -5.184946000 | 7.734813000  | -1.440082000 |
| H | -5.280978000 | 9.125157000  | -0.333810000 |
| C | -2.711419000 | 7.125073000  | 3.883350000  |
| H | -2.890278000 | 6.110303000  | 4.268526000  |
| H | -3.495230000 | 7.776636000  | 4.294139000  |
| H | -1.739083000 | 7.456262000  | 4.269901000  |
| C | 4.264670000  | -0.537105000 | 1.015590000  |
| C | 4.698668000  | -1.856893000 | 1.326746000  |
| C | 3.491587000  | -2.577674000 | 1.544972000  |
| C | 5.020579000  | 0.717773000  | 0.753431000  |
| H | 4.383862000  | 1.421608000  | 0.197822000  |
| H | 5.933036000  | 0.527843000  | 0.174642000  |
| H | 5.320373000  | 1.199247000  | 1.698753000  |
| C | 3.263424000  | -4.005311000 | 1.878272000  |
| H | 4.024984000  | -4.651791000 | 1.425335000  |
| H | 2.275761000  | -4.316608000 | 1.513832000  |
| H | 3.296327000  | -4.176500000 | 2.964783000  |
| C | 6.337600000  | -3.604424000 | 2.459246000  |
| C | 5.834851000  | -3.611442000 | 3.783763000  |
| C | 5.973413000  | -4.751290000 | 4.574962000  |
| H | 5.589784000  | -4.736505000 | 5.599421000  |
| C | 6.587709000  | -5.909994000 | 4.094112000  |
| C | 7.093392000  | -5.894777000 | 2.794655000  |
| H | 7.594890000  | -6.783404000 | 2.403700000  |
| C | 6.983175000  | -4.767519000 | 1.978504000  |
| C | 5.144696000  | -2.415287000 | 4.394163000  |
| H | 4.049944000  | -2.492239000 | 4.290479000  |
| H | 5.436336000  | -1.471872000 | 3.918603000  |
| H | 5.369055000  | -2.347953000 | 5.468848000  |
| C | 6.714798000  | -7.125983000 | 4.961972000  |
| H | 7.406561000  | -6.940082000 | 5.794992000  |
| H | 7.093926000  | -7.984549000 | 4.391125000  |
| H | 5.745371000  | -7.396864000 | 5.402022000  |
| C | 7.498470000  | -4.847217000 | 0.565729000  |
| H | 8.116585000  | -5.741665000 | 0.414631000  |
| H | 8.095437000  | -3.964364000 | 0.308417000  |
| H | 6.661606000  | -4.895295000 | -0.146900000 |
| C | 7.314371000  | -1.590119000 | 0.858266000  |
| C | 8.285045000  | -0.939593000 | 1.654837000  |
| C | 9.289385000  | -0.181868000 | 1.053319000  |
| H | 10.022283000 | 0.320958000  | 1.685359000  |
| C | 9.390595000  | -0.055100000 | -0.332404000 |
| C | 8.447360000  | -0.715845000 | -1.115562000 |
| H | 8.507768000  | -0.646999000 | -2.202489000 |
| C | 7.419616000  | -1.472514000 | -0.547559000 |
| C | 8.231268000  | -0.999399000 | 3.155951000  |
| H | 7.415499000  | -0.377020000 | 3.544434000  |
| H | 9.162631000  | -0.626091000 | 3.593573000  |
| H | 8.061528000  | -2.025577000 | 3.514386000  |
| C | 10.486326000 | 0.769690000  | -0.939447000 |
| H | 10.248216000 | 1.843827000  | -0.873151000 |
| H | 10.642030000 | 0.517380000  | -1.995498000 |
| H | 11.436212000 | 0.613600000  | -0.408251000 |
| C | 6.493980000  | -2.205029000 | -1.484196000 |
| H | 6.322593000  | -1.618533000 | -2.397756000 |
| H | 5.528912000  | -2.421128000 | -1.013583000 |
| H | 6.937324000  | -3.169558000 | -1.787191000 |
| B | -4.438002000 | -3.256634000 | 3.281553000  |
| B | -0.426259000 | 5.947520000  | 2.382902000  |
| B | 6.123802000  | -2.356104000 | 1.531221000  |

|    |              |              |              |
|----|--------------|--------------|--------------|
| Cu | -0.566052000 | 1.972294000  | -1.203650000 |
| Cu | 1.150680000  | -0.538500000 | -0.856752000 |
| Cu | -1.702024000 | -0.980976000 | -0.987965000 |
| N  | 1.175210000  | 2.059401000  | -1.976023000 |
| N  | 1.926712000  | 0.907325000  | -1.893086000 |
| N  | 0.641053000  | -2.363519000 | -1.389734000 |
| N  | -0.720924000 | -2.499083000 | -1.591987000 |
| N  | -2.924593000 | 0.495520000  | -1.071032000 |
| N  | -2.446209000 | 1.756877000  | -1.380781000 |
| C  | 1.908128000  | 3.011447000  | -2.564673000 |
| C  | 3.190905000  | 2.479007000  | -2.883743000 |
| C  | 3.122738000  | 1.125265000  | -2.446969000 |
| C  | 1.293171000  | 4.334840000  | -2.853578000 |
| H  | 1.644239000  | 4.735759000  | -3.814814000 |
| H  | 0.198980000  | 4.231275000  | -2.894261000 |
| H  | 1.539445000  | 5.081048000  | -2.084281000 |
| C  | 4.129031000  | 0.036977000  | -2.500805000 |
| H  | 5.140057000  | 0.423662000  | -2.317381000 |
| H  | 3.898824000  | -0.728740000 | -1.750265000 |
| H  | 4.143547000  | -0.448113000 | -3.489823000 |
| C  | 4.337058000  | 4.805232000  | -3.015665000 |
| C  | 4.084000000  | 5.298188000  | -1.711721000 |
| C  | 3.798928000  | 6.653151000  | -1.518417000 |
| H  | 3.624903000  | 7.021048000  | -0.500087000 |
| C  | 3.706904000  | 7.546736000  | -2.592594000 |
| C  | 3.960999000  | 7.055019000  | -3.877545000 |
| H  | 3.899208000  | 7.736878000  | -4.732168000 |
| C  | 4.288415000  | 5.708518000  | -4.099521000 |
| C  | 4.050187000  | 4.388059000  | -0.508129000 |
| H  | 3.017703000  | 4.058250000  | -0.307874000 |
| H  | 4.651062000  | 3.478809000  | -0.652713000 |
| H  | 4.415781000  | 4.910107000  | 0.389160000  |
| C  | 3.340398000  | 8.989263000  | -2.358650000 |
| H  | 4.044685000  | 9.467656000  | -1.664986000 |
| H  | 3.339532000  | 9.560563000  | -3.299864000 |
| H  | 2.338494000  | 9.073495000  | -1.906499000 |
| C  | 4.498196000  | 5.209000000  | -5.506749000 |
| H  | 3.664885000  | 4.559742000  | -5.817647000 |
| H  | 4.558870000  | 6.042282000  | -6.223677000 |
| H  | 5.416820000  | 4.604057000  | -5.583874000 |
| C  | 5.696993000  | 2.499830000  | -3.830851000 |
| C  | 5.590579000  | 1.598544000  | -4.922481000 |
| C  | 6.691333000  | 0.834621000  | -5.315549000 |
| H  | 6.580694000  | 0.137674000  | -6.150007000 |
| C  | 7.928159000  | 0.931701000  | -4.672501000 |
| C  | 8.038922000  | 1.835912000  | -3.619412000 |
| H  | 8.990999000  | 1.933335000  | -3.099756000 |
| C  | 6.958612000  | 2.613175000  | -3.191691000 |
| C  | 4.325090000  | 1.459943000  | -5.731296000 |
| H  | 4.238843000  | 0.447380000  | -6.148011000 |
| H  | 3.429998000  | 1.678977000  | -5.142004000 |
| H  | 4.333129000  | 2.162367000  | -6.580965000 |
| C  | 9.100095000  | 0.103074000  | -5.119445000 |
| H  | 9.880688000  | 0.061595000  | -4.349120000 |
| H  | 8.791573000  | -0.925101000 | -5.361393000 |
| H  | 9.556504000  | 0.531724000  | -6.027228000 |
| C  | 7.170527000  | 3.493132000  | -1.989723000 |
| H  | 8.241266000  | 3.687299000  | -1.833748000 |
| H  | 6.649367000  | 4.453444000  | -2.091457000 |
| H  | 6.795632000  | 3.003331000  | -1.078450000 |
| C  | 1.242686000  | -3.523283000 | -1.684937000 |
| C  | 0.257218000  | -4.459249000 | -2.110106000 |
| C  | -0.963985000 | -3.733345000 | -2.054010000 |

|   |              |              |              |
|---|--------------|--------------|--------------|
| C | 2.725187000  | -3.621184000 | -1.648150000 |
| H | 3.147779000  | -2.735453000 | -1.157121000 |
| H | 3.066762000  | -4.516410000 | -1.114333000 |
| H | 3.131646000  | -3.672502000 | -2.669695000 |
| C | -2.343070000 | -4.138240000 | -2.426631000 |
| H | -2.458582000 | -4.177017000 | -3.520905000 |
| H | -2.582113000 | -5.138813000 | -2.046466000 |
| H | -3.075120000 | -3.419189000 | -2.032783000 |
| C | -0.582877000 | -6.668697000 | -3.337065000 |
| C | -1.309708000 | -7.816655000 | -2.947475000 |
| C | -2.263635000 | -8.372214000 | -3.806494000 |
| H | -2.825705000 | -9.249409000 | -3.477385000 |
| C | -2.503532000 | -7.845102000 | -5.073677000 |
| C | -1.753871000 | -6.734806000 | -5.473378000 |
| H | -1.903539000 | -6.327155000 | -6.475518000 |
| C | -0.816825000 | -6.135946000 | -4.631982000 |
| C | -1.136843000 | -8.440856000 | -1.588404000 |
| H | -1.695188000 | -7.876429000 | -0.829916000 |
| H | -1.519469000 | -9.467005000 | -1.577843000 |
| H | -0.086225000 | -8.456785000 | -1.281173000 |
| C | -3.538194000 | -8.443841000 | -5.982700000 |
| H | -3.211797000 | -8.408107000 | -7.030744000 |
| H | -3.749908000 | -9.488075000 | -5.714902000 |
| H | -4.482075000 | -7.881104000 | -5.911986000 |
| C | -0.052472000 | -4.947375000 | -5.163539000 |
| H | 1.017573000  | -5.006217000 | -4.926620000 |
| H | -0.158580000 | -4.883811000 | -6.254683000 |
| H | -0.414460000 | -4.002490000 | -4.731525000 |
| C | 1.627448000  | -6.643285000 | -1.650313000 |
| C | 1.701823000  | -6.639871000 | -0.239538000 |
| C | 2.854080000  | -7.102699000 | 0.397820000  |
| H | 2.895172000  | -7.099395000 | 1.488410000  |
| C | 3.964180000  | -7.547768000 | -0.321409000 |
| C | 3.881878000  | -7.554493000 | -1.714470000 |
| H | 4.739547000  | -7.898153000 | -2.298387000 |
| C | 2.729864000  | -7.131463000 | -2.380885000 |
| C | 0.556637000  | -6.147596000 | 0.603546000  |
| H | 0.345705000  | -5.077254000 | 0.415637000  |
| H | -0.381511000 | -6.690708000 | 0.374303000  |
| H | 0.773798000  | -6.286102000 | 1.677481000  |
| C | 5.200168000  | -8.027190000 | 0.382719000  |
| H | 6.104835000  | -7.608919000 | -0.080590000 |
| H | 5.184946000  | -7.734813000 | 1.440082000  |
| H | 5.280978000  | -9.125157000 | 0.333810000  |
| C | 2.711419000  | -7.125073000 | -3.883350000 |
| H | 2.890278000  | -6.110303000 | -4.268526000 |
| H | 3.495230000  | -7.776636000 | -4.294139000 |
| H | 1.739083000  | -7.456262000 | -4.269901000 |
| C | -4.264670000 | 0.537105000  | -1.015590000 |
| C | -4.698668000 | 1.856893000  | -1.326746000 |
| C | -3.491587000 | 2.577674000  | -1.544972000 |
| C | -5.020579000 | -0.717773000 | -0.753431000 |
| H | -4.383862000 | -1.421608000 | -0.197822000 |
| H | -5.933036000 | -0.527843000 | -0.174642000 |
| H | -5.320373000 | -1.199247000 | -1.698753000 |
| C | -3.263424000 | 4.005311000  | -1.878272000 |
| H | -4.024984000 | 4.651791000  | -1.425335000 |
| H | -2.275761000 | 4.316608000  | -1.513832000 |
| H | -3.296327000 | 4.176500000  | -2.964783000 |
| C | -6.337600000 | 3.604424000  | -2.459246000 |
| C | -5.834851000 | 3.611442000  | -3.783763000 |
| C | -5.973413000 | 4.751290000  | -4.574962000 |
| H | -5.589784000 | 4.736505000  | -5.599421000 |

|   |               |              |              |
|---|---------------|--------------|--------------|
| C | -6.587709000  | 5.909994000  | -4.094112000 |
| C | -7.093392000  | 5.894777000  | -2.794655000 |
| H | -7.594890000  | 6.783404000  | -2.403700000 |
| C | -6.983175000  | 4.767519000  | -1.978504000 |
| C | -5.144696000  | 2.415287000  | -4.394163000 |
| H | -4.049944000  | 2.492239000  | -4.290479000 |
| H | -5.436336000  | 1.471872000  | -3.918603000 |
| H | -5.369055000  | 2.347953000  | -5.468848000 |
| C | -6.714798000  | 7.125983000  | -4.961972000 |
| H | -7.406561000  | 6.940082000  | -5.794992000 |
| H | -7.093926000  | 7.984549000  | -4.391125000 |
| H | -5.745371000  | 7.396864000  | -5.402022000 |
| C | -7.498470000  | 4.847217000  | -0.565729000 |
| H | -8.116585000  | 5.741665000  | -0.414631000 |
| H | -8.095437000  | 3.964364000  | -0.308417000 |
| H | -6.661606000  | 4.895295000  | 0.146900000  |
| C | -7.314371000  | 1.590119000  | -0.858266000 |
| C | -8.285045000  | 0.939593000  | -1.654837000 |
| C | -9.289385000  | 0.181868000  | -1.053319000 |
| H | -10.022283000 | -0.320958000 | -1.685359000 |
| C | -9.390595000  | 0.055100000  | 0.332404000  |
| C | -8.447360000  | 0.715845000  | 1.115562000  |
| H | -8.507768000  | 0.646999000  | 2.202489000  |
| C | -7.419616000  | 1.472514000  | 0.547559000  |
| C | -8.231268000  | 0.999399000  | -3.155951000 |
| H | -7.415499000  | 0.377020000  | -3.544434000 |
| H | -9.162631000  | 0.626091000  | -3.593573000 |
| H | -8.061528000  | 2.025577000  | -3.514386000 |
| C | -10.486326000 | -0.769690000 | 0.939447000  |
| H | -10.248216000 | -1.843827000 | 0.873151000  |
| H | -10.642030000 | -0.517380000 | 1.995498000  |
| H | -11.436212000 | -0.613600000 | 0.408251000  |
| C | -6.493980000  | 2.205029000  | 1.484196000  |
| H | -6.322593000  | 1.618533000  | 2.397756000  |
| H | -5.528912000  | 2.421128000  | 1.013583000  |
| H | -6.937324000  | 3.169558000  | 1.787191000  |
| B | 4.438002000   | 3.256634000  | -3.281553000 |
| B | 0.426259000   | -5.947520000 | -2.382902000 |
| B | -6.123802000  | 2.356104000  | -1.531221000 |

330

Cu3CF3-Cu3CF3

|    |              |              |             |
|----|--------------|--------------|-------------|
| Cu | -1.497534000 | 1.963030000  | 2.229562000 |
| Cu | -1.016909000 | -1.235275000 | 1.967792000 |
| F  | 0.142167000  | 3.535271000  | 4.314077000 |
| F  | 1.287834000  | 4.010621000  | 2.508743000 |
| F  | 2.342014000  | 3.523119000  | 4.380007000 |
| F  | 3.499343000  | -1.824767000 | 3.044481000 |
| F  | 1.572689000  | -2.627776000 | 3.688579000 |
| F  | 1.943601000  | -2.274359000 | 1.568606000 |
| F  | -0.292044000 | -3.914340000 | 2.145624000 |
| F  | -1.473969000 | -5.755229000 | 1.996632000 |
| F  | -0.883196000 | -4.676925000 | 0.183564000 |
| N  | 0.183460000  | 1.222947000  | 2.644797000 |
| N  | 0.411639000  | -0.102569000 | 2.447669000 |
| N  | -2.498040000 | -2.376181000 | 1.700846000 |
| C  | 1.286000000  | 1.753995000  | 3.231726000 |
| C  | 2.264418000  | 0.769601000  | 3.440216000 |
| C  | 1.644919000  | -0.383522000 | 2.932446000 |
| C  | 1.274512000  | 3.202069000  | 3.602892000 |
| C  | 2.170706000  | -1.771133000 | 2.816028000 |
| C  | 3.886254000  | 0.035688000  | 5.457392000 |
| C  | 5.114398000  | -0.652987000 | 5.640725000 |
| C  | 5.335416000  | -1.365863000 | 6.816836000 |



|   |              |              |              |
|---|--------------|--------------|--------------|
| H | 6.275354000  | -1.907806000 | 6.934842000  |
| C | 4.401011000  | -1.404186000 | 7.845133000  |
| C | 3.195714000  | -0.730369000 | 7.658744000  |
| H | 2.446961000  | -0.750317000 | 8.451712000  |
| C | 2.915223000  | -0.035570000 | 6.486291000  |
| C | 6.203504000  | -0.693559000 | 4.602283000  |
| H | 5.816239000  | -0.841282000 | 3.589924000  |
| H | 6.892489000  | -1.522032000 | 4.815641000  |
| H | 6.788873000  | 0.238605000  | 4.588854000  |
| C | 4.681488000  | -2.138675000 | 9.121475000  |
| H | 4.901493000  | -1.428134000 | 9.932502000  |
| H | 5.542796000  | -2.809853000 | 9.015678000  |
| H | 3.813715000  | -2.737557000 | 9.429940000  |
| C | 1.582057000  | 0.661341000  | 6.392363000  |
| H | 1.683410000  | 1.718366000  | 6.111558000  |
| H | 1.068108000  | 0.625764000  | 7.361498000  |
| H | 0.929811000  | 0.179310000  | 5.648654000  |
| C | 4.789762000  | 1.753930000  | 3.598396000  |
| C | 5.218720000  | 1.592091000  | 2.260325000  |
| C | 6.392253000  | 2.203590000  | 1.831060000  |
| H | 6.743790000  | 2.020780000  | 0.815291000  |
| C | 7.107116000  | 3.070132000  | 2.650917000  |
| C | 6.641941000  | 3.279493000  | 3.949932000  |
| H | 7.179907000  | 3.968610000  | 4.603285000  |
| C | 5.528621000  | 2.609397000  | 4.446580000  |
| C | 4.497142000  | 0.711203000  | 1.282454000  |
| H | 4.952932000  | 0.826737000  | 0.288319000  |
| H | 3.429365000  | 0.965811000  | 1.204305000  |
| H | 4.576479000  | -0.352224000 | 1.552163000  |
| C | 8.302750000  | 3.808055000  | 2.124942000  |
| H | 7.986123000  | 4.750973000  | 1.652957000  |
| H | 8.830395000  | 3.223001000  | 1.363160000  |
| H | 9.005616000  | 4.057567000  | 2.928429000  |
| C | 5.158156000  | 2.821048000  | 5.892560000  |
| H | 5.581946000  | 2.024827000  | 6.526170000  |
| H | 4.074422000  | 2.815433000  | 6.055566000  |
| H | 5.551831000  | 3.781921000  | 6.250699000  |
| C | -2.559834000 | -3.718141000 | 1.547819000  |
| C | -3.888177000 | -4.166319000 | 1.561686000  |
| C | -1.311510000 | -4.524073000 | 1.455831000  |
| C | -5.536163000 | -6.204230000 | 2.230625000  |
| C | -6.627075000 | -6.886130000 | 1.637432000  |
| C | -7.642595000 | -7.404232000 | 2.443706000  |
| H | -8.492528000 | -7.905039000 | 1.972836000  |
| C | -7.603224000 | -7.296368000 | 3.831514000  |
| C | -6.514475000 | -6.640941000 | 4.410947000  |
| H | -6.464430000 | -6.558280000 | 5.498619000  |
| C | -5.492859000 | -6.087048000 | 3.640017000  |
| C | -6.751451000 | -7.060764000 | 0.145859000  |
| H | -6.478731000 | -6.148070000 | -0.404454000 |
| H | -7.785715000 | -7.325801000 | -0.120923000 |
| H | -6.084479000 | -7.858720000 | -0.218754000 |
| C | -8.693107000 | -7.877888000 | 4.687725000  |
| H | -8.316639000 | -8.737958000 | 5.266021000  |
| H | -9.542089000 | -8.223268000 | 4.080096000  |
| H | -9.064879000 | -7.131899000 | 5.402828000  |
| C | -4.336530000 | -5.419850000 | 4.345480000  |
| H | -3.364068000 | -5.733887000 | 3.937922000  |
| H | -4.347610000 | -5.671677000 | 5.415692000  |
| H | -4.387600000 | -4.324356000 | 4.255581000  |
| B | 3.649769000  | 0.870987000  | 4.166315000  |
| B | -4.409109000 | -5.622847000 | 1.335315000  |
| F | -6.509468000 | -1.532784000 | 1.639805000  |

|    |              |              |              |
|----|--------------|--------------|--------------|
| F  | -6.791199000 | -3.663178000 | 1.170335000  |
| F  | -6.460905000 | -3.040786000 | 3.258470000  |
| N  | -3.773810000 | -1.906669000 | 1.819081000  |
| C  | -4.608239000 | -2.975231000 | 1.763956000  |
| C  | -6.086599000 | -2.811268000 | 1.955111000  |
| C  | -3.761345000 | -6.457620000 | 0.199338000  |
| C  | -3.298830000 | -7.771880000 | 0.449313000  |
| C  | -2.650374000 | -8.472341000 | -0.567502000 |
| H  | -2.260135000 | -9.470624000 | -0.354767000 |
| C  | -2.481476000 | -7.932539000 | -1.845360000 |
| C  | -2.995312000 | -6.659917000 | -2.100453000 |
| H  | -2.899426000 | -6.228856000 | -3.101788000 |
| C  | -3.609619000 | -5.913362000 | -1.101258000 |
| C  | -3.451606000 | -8.440666000 | 1.794637000  |
| H  | -3.111079000 | -7.802181000 | 2.621475000  |
| H  | -2.864470000 | -9.368345000 | 1.826228000  |
| H  | -4.508044000 | -8.693676000 | 1.998172000  |
| C  | -1.770069000 | -8.690245000 | -2.926363000 |
| H  | -2.460460000 | -8.940152000 | -3.746553000 |
| H  | -1.336112000 | -9.622763000 | -2.543907000 |
| H  | -0.956085000 | -8.083787000 | -3.350469000 |
| C  | -4.166088000 | -4.560399000 | -1.449116000 |
| H  | -5.145784000 | -4.388187000 | -0.981700000 |
| H  | -4.296363000 | -4.453864000 | -2.536007000 |
| H  | -3.499765000 | -3.749945000 | -1.111848000 |
| Cu | -4.047413000 | -0.018131000 | 1.727093000  |
| F  | -1.353142000 | 4.726597000  | 1.593415000  |
| F  | -2.616306000 | 5.414596000  | 3.248331000  |
| F  | -2.956207000 | 6.181468000  | 1.217476000  |
| F  | -7.589638000 | 3.008632000  | 0.856194000  |
| F  | -6.636355000 | 1.390327000  | -0.283598000 |
| F  | -6.974312000 | 1.160427000  | 1.868963000  |
| N  | -3.189100000 | 2.672540000  | 1.818001000  |
| N  | -4.251581000 | 1.863734000  | 1.557705000  |
| C  | -3.587271000 | 3.955490000  | 1.654325000  |
| C  | -4.925295000 | 4.013816000  | 1.241368000  |
| C  | -5.288020000 | 2.660262000  | 1.196669000  |
| C  | -2.635127000 | 5.070866000  | 1.925521000  |
| C  | -6.619631000 | 2.062388000  | 0.902041000  |
| C  | -6.381717000 | 5.349497000  | -0.567766000 |
| C  | -7.724953000 | 5.767244000  | -0.742783000 |
| C  | -8.280237000 | 5.785848000  | -2.024174000 |
| H  | -9.322547000 | 6.086949000  | -2.142699000 |
| C  | -7.546472000 | 5.430360000  | -3.155112000 |
| C  | -6.219679000 | 5.041452000  | -2.978789000 |
| H  | -5.625265000 | 4.763781000  | -3.851466000 |
| C  | -5.630709000 | 4.989535000  | -1.715149000 |
| C  | -8.611245000 | 6.170714000  | 0.410452000  |
| H  | -8.500688000 | 5.506528000  | 1.279069000  |
| H  | -9.664417000 | 6.148890000  | 0.100040000  |
| H  | -8.382856000 | 7.190158000  | 0.761726000  |
| C  | -8.153156000 | 5.480303000  | -4.531028000 |
| H  | -7.788333000 | 6.366149000  | -5.078766000 |
| H  | -9.249178000 | 5.539271000  | -4.485276000 |
| H  | -7.877912000 | 4.589445000  | -5.116273000 |
| C  | -4.178512000 | 4.595650000  | -1.636393000 |
| H  | -3.582556000 | 5.308238000  | -1.047667000 |
| H  | -3.745022000 | 4.547437000  | -2.643966000 |
| H  | -4.058422000 | 3.605165000  | -1.174106000 |
| C  | -5.946389000 | 6.426813000  | 1.890242000  |
| C  | -6.261098000 | 6.155043000  | 3.249826000  |
| C  | -6.503264000 | 7.207371000  | 4.130835000  |
| H  | -6.771686000 | 6.982657000  | 5.167663000  |

|    |              |              |              |
|----|--------------|--------------|--------------|
| C  | -6.408563000 | 8.539738000  | 3.726946000  |
| C  | -6.064800000 | 8.802867000  | 2.399155000  |
| H  | -5.966111000 | 9.840072000  | 2.068510000  |
| C  | -5.843575000 | 7.780690000  | 1.477086000  |
| C  | -6.412637000 | 4.751186000  | 3.783357000  |
| H  | -6.740502000 | 4.774954000  | 4.830628000  |
| H  | -5.466184000 | 4.194478000  | 3.739806000  |
| H  | -7.159727000 | 4.177644000  | 3.215900000  |
| C  | -6.632284000 | 9.652601000  | 4.710588000  |
| H  | -5.725299000 | 9.811548000  | 5.319774000  |
| H  | -7.460100000 | 9.418455000  | 5.399814000  |
| H  | -6.865886000 | 10.596423000 | 4.195016000  |
| C  | -5.484858000 | 8.179451000  | 0.066932000  |
| H  | -6.363512000 | 8.141551000  | -0.597430000 |
| H  | -4.723213000 | 7.523171000  | -0.374736000 |
| H  | -5.095393000 | 9.207275000  | 0.052922000  |
| B  | -5.762824000 | 5.281741000  | 0.857617000  |
| Cu | 1.497534000  | -1.963030000 | -2.229562000 |
| Cu | 1.016909000  | 1.235275000  | -1.967792000 |
| F  | -0.142167000 | -3.535271000 | -4.314077000 |
| F  | -1.287834000 | -4.010621000 | -2.508743000 |
| F  | -2.342014000 | -3.523119000 | -4.380007000 |
| F  | -3.499343000 | 1.824767000  | -3.044481000 |
| F  | -1.572689000 | 2.627776000  | -3.688579000 |
| F  | -1.943601000 | 2.274359000  | -1.568606000 |
| F  | 0.292044000  | 3.914340000  | -2.145624000 |
| F  | 1.473969000  | 5.755229000  | -1.996632000 |
| F  | 0.883196000  | 4.676925000  | -0.183564000 |
| N  | -0.183460000 | -1.222947000 | -2.644797000 |
| N  | -0.411639000 | 0.102569000  | -2.447669000 |
| N  | 2.498040000  | 2.376181000  | -1.700846000 |
| C  | -1.286000000 | -1.753995000 | -3.231726000 |
| C  | -2.264418000 | -0.769601000 | -3.440216000 |
| C  | -1.644919000 | 0.383522000  | -2.932446000 |
| C  | -1.274512000 | -3.202069000 | -3.602892000 |
| C  | -2.170706000 | 1.771133000  | -2.816028000 |
| C  | -3.886254000 | -0.035688000 | -5.457392000 |
| C  | -5.114398000 | 0.652987000  | -5.640725000 |
| C  | -5.335416000 | 1.365863000  | -6.816836000 |
| H  | -6.275354000 | 1.907806000  | -6.934842000 |
| C  | -4.401011000 | 1.404186000  | -7.845133000 |
| C  | -3.195714000 | 0.730369000  | -7.658744000 |
| H  | -2.446961000 | 0.750317000  | -8.451712000 |
| C  | -2.915223000 | 0.035570000  | -6.486291000 |
| C  | -6.203504000 | 0.693559000  | -4.602283000 |
| H  | -5.816239000 | 0.841282000  | -3.589924000 |
| H  | -6.892489000 | 1.522032000  | -4.815641000 |
| H  | -6.788873000 | -0.238605000 | -4.588854000 |
| C  | -4.681488000 | 2.138675000  | -9.121475000 |
| H  | -4.901493000 | 1.428134000  | -9.932502000 |
| H  | -5.542796000 | 2.809853000  | -9.015678000 |
| H  | -3.813715000 | 2.737557000  | -9.429940000 |
| C  | -1.582057000 | -0.661341000 | -6.392363000 |
| H  | -1.683410000 | -1.718366000 | -6.111558000 |
| H  | -1.068108000 | -0.625764000 | -7.361498000 |
| H  | -0.929811000 | -0.179310000 | -5.648654000 |
| C  | -4.789762000 | -1.753930000 | -3.598396000 |
| C  | -5.218720000 | -1.592091000 | -2.260325000 |
| C  | -6.392253000 | -2.203590000 | -1.831060000 |
| H  | -6.743790000 | -2.020780000 | -0.815291000 |
| C  | -7.107116000 | -3.070132000 | -2.650917000 |
| C  | -6.641941000 | -3.279493000 | -3.949932000 |
| H  | -7.179907000 | -3.968610000 | -4.603285000 |

|   |              |              |              |
|---|--------------|--------------|--------------|
| C | -5.528621000 | -2.609397000 | -4.446580000 |
| C | -4.497142000 | -0.711203000 | -1.282454000 |
| H | -4.952932000 | -0.826737000 | -0.288319000 |
| H | -3.429365000 | -0.965811000 | -1.204305000 |
| H | -4.576479000 | 0.352224000  | -1.552163000 |
| C | -8.302750000 | -3.808055000 | -2.124942000 |
| H | -7.986123000 | -4.750973000 | -1.652957000 |
| H | -8.830395000 | -3.223001000 | -1.363160000 |
| H | -9.005616000 | -4.057567000 | -2.928429000 |
| C | -5.158156000 | -2.821048000 | -5.892560000 |
| H | -5.581946000 | -2.024827000 | -6.526170000 |
| H | -4.074422000 | -2.815433000 | -6.055566000 |
| H | -5.551831000 | -3.781921000 | -6.250699000 |
| C | 2.559834000  | 3.718141000  | -1.547819000 |
| C | 3.888177000  | 4.166319000  | -1.561686000 |
| C | 1.311510000  | 4.524073000  | -1.455831000 |
| C | 5.536163000  | 6.204230000  | -2.230625000 |
| C | 6.627075000  | 6.886130000  | -1.637432000 |
| C | 7.642595000  | 7.404232000  | -2.443706000 |
| H | 8.492528000  | 7.905039000  | -1.972836000 |
| C | 7.603224000  | 7.296368000  | -3.831514000 |
| C | 6.514475000  | 6.640941000  | -4.410947000 |
| H | 6.464430000  | 6.558280000  | -5.498619000 |
| C | 5.492859000  | 6.087048000  | -3.640017000 |
| C | 6.751451000  | 7.060764000  | -0.145859000 |
| H | 6.478731000  | 6.148070000  | 0.404454000  |
| H | 7.785715000  | 7.325801000  | 0.120923000  |
| H | 6.084479000  | 7.858720000  | 0.218754000  |
| C | 8.693107000  | 7.877888000  | -4.687725000 |
| H | 8.316639000  | 8.737958000  | -5.266021000 |
| H | 9.542089000  | 8.223268000  | -4.080096000 |
| H | 9.064879000  | 7.131899000  | -5.402828000 |
| C | 4.336530000  | 5.419850000  | -4.345480000 |
| H | 3.364068000  | 5.733887000  | -3.937922000 |
| H | 4.347610000  | 5.671677000  | -5.415692000 |
| H | 4.387600000  | 4.324356000  | -4.255581000 |
| B | -3.649769000 | -0.870987000 | -4.166315000 |
| B | 4.409109000  | 5.622847000  | -1.335315000 |
| F | 6.509468000  | 1.532784000  | -1.639805000 |
| F | 6.791199000  | 3.663178000  | -1.170335000 |
| F | 6.460905000  | 3.040786000  | -3.258470000 |
| N | 3.773810000  | 1.906669000  | -1.819081000 |
| C | 4.608239000  | 2.975231000  | -1.763956000 |
| C | 6.086599000  | 2.811268000  | -1.955111000 |
| C | 3.761345000  | 6.457620000  | -0.199338000 |
| C | 3.298830000  | 7.771880000  | -0.449313000 |
| C | 2.650374000  | 8.472341000  | 0.567502000  |
| H | 2.260135000  | 9.470624000  | 0.354767000  |
| C | 2.481476000  | 7.932539000  | 1.845360000  |
| C | 2.995312000  | 6.659917000  | 2.100453000  |
| H | 2.899426000  | 6.228856000  | 3.101788000  |
| C | 3.609619000  | 5.913362000  | 1.101258000  |
| C | 3.451606000  | 8.440666000  | -1.794637000 |
| H | 3.111079000  | 7.802181000  | -2.621475000 |
| H | 2.864470000  | 9.368345000  | -1.826228000 |
| H | 4.508044000  | 8.693676000  | -1.998172000 |
| C | 1.770069000  | 8.690245000  | 2.926363000  |
| H | 2.460460000  | 8.940152000  | 3.746553000  |
| H | 1.336112000  | 9.622763000  | 2.543907000  |
| H | 0.956085000  | 8.083787000  | 3.350469000  |
| C | 4.166088000  | 4.560399000  | 1.449116000  |
| H | 5.145784000  | 4.388187000  | 0.981700000  |
| H | 4.296363000  | 4.453864000  | 2.536007000  |

|    |             |               |              |
|----|-------------|---------------|--------------|
| H  | 3.499765000 | 3.749945000   | 1.111848000  |
| Cu | 4.047413000 | 0.018131000   | -1.727093000 |
| F  | 1.353142000 | -4.726597000  | -1.593415000 |
| F  | 2.616306000 | -5.414596000  | -3.248331000 |
| F  | 2.956207000 | -6.181468000  | -1.217476000 |
| F  | 7.589638000 | -3.008632000  | -0.856194000 |
| F  | 6.636355000 | -1.390327000  | 0.283598000  |
| F  | 6.974312000 | -1.160427000  | -1.868963000 |
| N  | 3.189100000 | -2.672540000  | -1.818001000 |
| N  | 4.251581000 | -1.863734000  | -1.557705000 |
| C  | 3.587271000 | -3.955490000  | -1.654325000 |
| C  | 4.925295000 | -4.013816000  | -1.241368000 |
| C  | 5.288020000 | -2.660262000  | -1.196669000 |
| C  | 2.635127000 | -5.070866000  | -1.925521000 |
| C  | 6.619631000 | -2.062388000  | -0.902041000 |
| C  | 6.381717000 | -5.349497000  | 0.567766000  |
| C  | 7.724953000 | -5.767244000  | 0.742783000  |
| C  | 8.280237000 | -5.785848000  | 2.024174000  |
| H  | 9.322547000 | -6.086949000  | 2.142699000  |
| C  | 7.546472000 | -5.430360000  | 3.155112000  |
| C  | 6.219679000 | -5.041452000  | 2.978789000  |
| H  | 5.625265000 | -4.763781000  | 3.851466000  |
| C  | 5.630709000 | -4.989535000  | 1.715149000  |
| C  | 8.611245000 | -6.170714000  | -0.410452000 |
| H  | 8.500688000 | -5.506528000  | -1.279069000 |
| H  | 9.664417000 | -6.148890000  | -0.100040000 |
| H  | 8.382856000 | -7.190158000  | -0.761726000 |
| C  | 8.153156000 | -5.480303000  | 4.531028000  |
| H  | 7.788333000 | -6.366149000  | 5.078766000  |
| H  | 9.249178000 | -5.539271000  | 4.485276000  |
| H  | 7.877912000 | -4.589445000  | 5.116273000  |
| C  | 4.178512000 | -4.595650000  | 1.636393000  |
| H  | 3.582556000 | -5.308238000  | 1.047667000  |
| H  | 3.745022000 | -4.547437000  | 2.643966000  |
| H  | 4.058422000 | -3.605165000  | 1.174106000  |
| C  | 5.946389000 | -6.426813000  | -1.890242000 |
| C  | 6.261098000 | -6.155043000  | -3.249826000 |
| C  | 6.503264000 | -7.207371000  | -4.130835000 |
| H  | 6.771686000 | -6.982657000  | -5.167663000 |
| C  | 6.408563000 | -8.539738000  | -3.726946000 |
| C  | 6.064800000 | -8.802867000  | -2.399155000 |
| H  | 5.966111000 | -9.840072000  | -2.068510000 |
| C  | 5.843575000 | -7.780690000  | -1.477086000 |
| C  | 6.412637000 | -4.751186000  | -3.783357000 |
| H  | 6.740502000 | -4.774954000  | -4.830628000 |
| H  | 5.466184000 | -4.194478000  | -3.739806000 |
| H  | 7.159727000 | -4.177644000  | -3.215900000 |
| C  | 6.632284000 | -9.652601000  | -4.710588000 |
| H  | 5.725299000 | -9.811548000  | -5.319774000 |
| H  | 7.460100000 | -9.418455000  | -5.399814000 |
| H  | 6.865886000 | -10.596423000 | -4.195016000 |
| C  | 5.484858000 | -8.179451000  | -0.066932000 |
| H  | 6.363512000 | -8.141551000  | 0.597430000  |
| H  | 4.723213000 | -7.523171000  | 0.374736000  |
| H  | 5.095393000 | -9.207275000  | -0.052922000 |
| B  | 5.762824000 | -5.281741000  | -0.857617000 |

330

Cu3CF3-Cu3CF3-T1

|    |              |              |             |
|----|--------------|--------------|-------------|
| Cu | -0.968736755 | 1.690415262  | 1.479265945 |
| Cu | -0.622919755 | -1.498644738 | 1.803729945 |
| F  | 0.273504245  | 3.473371262  | 3.673823945 |
| F  | 1.596078245  | 3.749363262  | 1.938420945 |
| F  | 2.432969245  | 3.597405262  | 3.958054945 |

|   |              |              |              |
|---|--------------|--------------|--------------|
| F | 3.475911245  | -1.982912738 | 4.015306945  |
| F | 1.656279245  | -2.008072738 | 5.218699945  |
| F | 1.617226245  | -2.857936738 | 3.210000945  |
| F | -0.015157755 | -4.126414738 | 1.802333945  |
| F | -1.270444755 | -5.420610738 | 3.053256945  |
| F | -1.085941755 | -5.808552738 | 0.911513945  |
| N | 0.649816245  | 0.984969262  | 2.213643945  |
| N | 0.778326245  | -0.354159738 | 2.451102945  |
| N | -2.203639755 | -2.574990738 | 1.573161945  |
| C | 1.560435245  | 1.632045262  | 2.988031945  |
| C | 2.305525245  | 0.727058262  | 3.758873945  |
| C | 1.751166245  | -0.510661738 | 3.384564945  |
| C | 1.483289245  | 3.110624262  | 3.129225945  |
| C | 2.123100245  | -1.835732738 | 3.949864945  |
| C | 3.381218245  | 0.404149262  | 6.194662945  |
| C | 4.515098245  | -0.230522738 | 6.785537945  |
| C | 4.442074245  | -0.724396738 | 8.086439945  |
| H | 5.316852245  | -1.216222738 | 8.516532945  |
| C | 3.275922245  | -0.629570738 | 8.842232945  |
| C | 2.160598245  | -0.011220738 | 8.258067945  |
| H | 1.243890245  | 0.085757262  | 8.844323945  |
| C | 2.187991245  | 0.489075262  | 6.963328945  |
| C | 5.787524245  | -0.411799738 | 6.014864945  |
| H | 5.600734245  | -0.884770738 | 5.039323945  |
| H | 6.498212245  | -1.036210738 | 6.572837945  |
| H | 6.275248245  | 0.555248262  | 5.800003945  |
| C | 3.200172245  | -1.168860738 | 10.237868945 |
| H | 3.036819245  | -0.354091738 | 10.962072945 |
| H | 4.124691245  | -1.692868738 | 10.517766945 |
| H | 2.360739245  | -1.872376738 | 10.342429945 |
| C | 0.954594245  | 1.169655262  | 6.435245945  |
| H | 1.186891245  | 2.160153262  | 6.017484945  |
| H | 0.213572245  | 1.303833262  | 7.234701945  |
| H | 0.482572245  | 0.584447262  | 5.632777945  |
| C | 4.684459245  | 1.855558262  | 4.286956945  |
| C | 5.289290245  | 1.635543262  | 3.019515945  |
| C | 6.394665245  | 2.381996262  | 2.628324945  |
| H | 6.856460245  | 2.178267262  | 1.662126945  |
| C | 6.927980245  | 3.388354262  | 3.436689945  |
| C | 6.335297245  | 3.611956262  | 4.684650945  |
| H | 6.731550245  | 4.402898262  | 5.325658945  |
| C | 5.241039245  | 2.876722262  | 5.120200945  |
| C | 4.811823245  | 0.548926262  | 2.105171945  |
| H | 5.550580245  | 0.367740262  | 1.320875945  |
| H | 3.851713245  | 0.827526262  | 1.634153945  |
| H | 4.635577245  | -0.395765738 | 2.637261945  |
| C | 8.076541245  | 4.229158262  | 2.973657945  |
| H | 7.780016245  | 5.288414262  | 2.909106945  |
| H | 8.432531245  | 3.912711262  | 1.984417945  |
| H | 8.919884245  | 4.170146262  | 3.681000945  |
| C | 4.641404245  | 3.193040262  | 6.458940945  |
| H | 4.803395245  | 2.371544262  | 7.178721945  |
| H | 3.551549245  | 3.327716262  | 6.388111945  |
| H | 5.084556245  | 4.106880262  | 6.878905945  |
| C | -2.356193755 | -3.918204738 | 1.607782945  |
| C | -3.717218755 | -4.271097738 | 1.653253945  |
| C | -1.186081755 | -4.822211738 | 1.818800945  |
| C | -5.334350755 | -6.330625738 | 2.573884945  |
| C | -6.296260755 | -7.288894738 | 2.132060945  |
| C | -6.954545755 | -8.089930738 | 3.051073945  |
| H | -7.688569755 | -8.811019738 | 2.691737945  |
| C | -6.694159755 | -8.007264738 | 4.420874945  |
| C | -5.811719755 | -7.029871738 | 4.856428945  |

|    |              |              |              |
|----|--------------|--------------|--------------|
| H  | -5.619641755 | -6.924207738 | 5.926150945  |
| C  | -5.152972755 | -6.172631738 | 3.971525945  |
| C  | -6.677730755 | -7.433362738 | 0.684059945  |
| H  | -6.957541755 | -6.462763738 | 0.256264945  |
| H  | -7.537881755 | -8.105678738 | 0.582629945  |
| H  | -5.857557755 | -7.834130738 | 0.076211945  |
| C  | -7.345186755 | -8.951662738 | 5.384717945  |
| H  | -6.720018755 | -9.847138738 | 5.522576945  |
| H  | -8.323093755 | -9.284184738 | 5.016676945  |
| H  | -7.483112755 | -8.487325738 | 6.370288945  |
| C  | -4.258132755 | -5.143192738 | 4.604277945  |
| H  | -3.614389755 | -5.611922738 | 5.363499945  |
| H  | -4.879443755 | -4.387921738 | 5.110996945  |
| H  | -3.616508755 | -4.621005738 | 3.891071945  |
| B  | 3.472196245  | 1.003292262  | 4.765373945  |
| B  | -4.356645755 | -5.702251738 | 1.550651945  |
| F  | -6.170552755 | -1.531353738 | 1.411933945  |
| F  | -6.558385755 | -3.673183738 | 1.129811945  |
| F  | -6.174524755 | -2.876416738 | 3.129561945  |
| N  | -3.445760755 | -2.012274738 | 1.560158945  |
| C  | -4.349537755 | -3.021662738 | 1.643153945  |
| C  | -5.803650755 | -2.775866738 | 1.819606945  |
| C  | -3.818616755 | -6.543450738 | 0.342555945  |
| C  | -3.136483755 | -7.762372738 | 0.571741945  |
| C  | -2.494166755 | -8.394624738 | -0.489659055 |
| H  | -1.929293755 | -9.308737738 | -0.295806055 |
| C  | -2.525620755 | -7.880225738 | -1.788775055 |
| C  | -3.264903755 | -6.724171738 | -2.018183055 |
| H  | -3.334120755 | -6.321219738 | -3.029126055 |
| C  | -3.901826755 | -6.048247738 | -0.980391055 |
| C  | -3.033799755 | -8.371511738 | 1.944878945  |
| H  | -2.680139755 | -7.644653738 | 2.690624945  |
| H  | -2.329908755 | -9.214666738 | 1.937944945  |
| H  | -4.009716755 | -8.741513738 | 2.293370945  |
| C  | -1.762537755 | -8.548411738 | -2.891893055 |
| H  | -1.980114755 | -8.085660738 | -3.863718055 |
| H  | -2.008869755 | -9.617897738 | -2.953582055 |
| H  | -0.677094755 | -8.465129738 | -2.710214055 |
| C  | -4.730976755 | -4.843008738 | -1.300568055 |
| H  | -5.754292755 | -4.954740738 | -0.913065055 |
| H  | -4.797108755 | -4.684013738 | -2.383329055 |
| H  | -4.318645755 | -3.927151738 | -0.854680055 |
| Cu | -3.646212755 | -0.130654738 | 1.177783945  |
| F  | -0.789426755 | 4.472080262  | 1.431994945  |
| F  | -2.159831755 | 5.322194262  | 2.910480945  |
| F  | -2.239890755 | 5.998243262  | 0.831354945  |
| F  | -7.124187755 | 3.014207262  | 1.387745945  |
| F  | -6.619593755 | 2.273698262  | -0.611189055 |
| F  | -6.465082755 | 0.943417262  | 1.124388945  |
| N  | -2.673924755 | 2.528964262  | 1.195293945  |
| N  | -3.804483755 | 1.789465262  | 0.980726945  |
| C  | -3.041934755 | 3.826580262  | 1.308539945  |
| C  | -4.419655755 | 3.975486262  | 1.119535945  |
| C  | -4.847157755 | 2.655833262  | 0.917402945  |
| C  | -2.058050755 | 4.902988262  | 1.619676945  |
| C  | -6.257590755 | 2.224827262  | 0.695011945  |
| C  | -6.150971755 | 5.532718262  | -0.201247055 |
| C  | -7.464663755 | 6.035109262  | -0.033592055 |
| C  | -8.263015755 | 6.269067262  | -1.154336055 |
| H  | -9.282242755 | 6.635353262  | -1.010525055 |
| C  | -7.794106755 | 6.055110262  | -2.449668055 |
| C  | -6.494266755 | 5.572336262  | -2.608509055 |
| H  | -6.105971755 | 5.402247262  | -3.615879055 |

|    |              |              |              |
|----|--------------|--------------|--------------|
| C  | -5.675711755 | 5.293442262  | -1.517000055 |
| C  | -8.054952755 | 6.313407262  | 1.326226945  |
| H  | -7.847868755 | 5.504846262  | 2.040893945  |
| H  | -9.145603755 | 6.427329262  | 1.251947945  |
| H  | -7.645621755 | 7.238265262  | 1.762267945  |
| C  | -8.654370755 | 6.331334262  | -3.648843055 |
| H  | -8.203791755 | 7.112548262  | -4.279504055 |
| H  | -9.657461755 | 6.666077262  | -3.353415055 |
| H  | -8.760869755 | 5.427758262  | -4.267531055 |
| C  | -4.281178755 | 4.795635262  | -1.793134055 |
| H  | -3.516512755 | 5.388556262  | -1.271545055 |
| H  | -4.064326755 | 4.838852262  | -2.867991055 |
| H  | -4.155847755 | 3.751921262  | -1.473346055 |
| C  | -5.086521755 | 6.381374262  | 2.144119945  |
| C  | -5.174034755 | 6.037450262  | 3.516277945  |
| C  | -5.126591755 | 7.037240262  | 4.486844945  |
| H  | -5.224186755 | 6.760273262  | 5.539416945  |
| C  | -4.951490755 | 8.378745262  | 4.150765945  |
| C  | -4.830164755 | 8.707683262  | 2.801212945  |
| H  | -4.674156755 | 9.751481262  | 2.519930945  |
| C  | -4.910467755 | 7.744407262  | 1.796299945  |
| C  | -5.362860755 | 4.614856262  | 3.978069945  |
| H  | -5.606557755 | 4.590468262  | 5.049384945  |
| H  | -4.445175755 | 4.024883262  | 3.827892945  |
| H  | -6.171314755 | 4.103994262  | 3.437006945  |
| C  | -4.855923755 | 9.433464262  | 5.213195945  |
| H  | -3.820404755 | 9.514602262  | 5.579075945  |
| H  | -5.495826755 | 9.191805262  | 6.072124945  |
| H  | -5.151440755 | 10.417323262 | 4.824882945  |
| C  | -4.778377755 | 8.203304262  | 0.365413945  |
| H  | -5.751697755 | 8.203052262  | -0.152222055 |
| H  | -4.105462755 | 7.556676262  | -0.214624055 |
| H  | -4.374489755 | 9.224735262  | 0.331170945  |
| B  | -5.232621755 | 5.304863262  | 1.032539945  |
| Cu | 0.968736755  | -1.690415262 | -1.479265945 |
| Cu | 0.622919755  | 1.498644738  | -1.803729945 |
| F  | -0.273504245 | -3.473371262 | -3.673823945 |
| F  | -1.596078245 | -3.749363262 | -1.938420945 |
| F  | -2.432969245 | -3.597405262 | -3.958054945 |
| F  | -3.475911245 | 1.982912738  | -4.015306945 |
| F  | -1.656279245 | 2.008072738  | -5.218699945 |
| F  | -1.617226245 | 2.857936738  | -3.210000945 |
| F  | 0.015157755  | 4.126414738  | -1.802333945 |
| F  | 1.270444755  | 5.420610738  | -3.053256945 |
| F  | 1.085941755  | 5.808552738  | -0.911513945 |
| N  | -0.649816245 | -0.984969262 | -2.213643945 |
| N  | -0.778326245 | 0.354159738  | -2.451102945 |
| N  | 2.203639755  | 2.574990738  | -1.573161945 |
| C  | -1.560435245 | -1.632045262 | -2.988031945 |
| C  | -2.305525245 | -0.727058262 | -3.758873945 |
| C  | -1.751166245 | 0.510661738  | -3.384564945 |
| C  | -1.483289245 | -3.110624262 | -3.129225945 |
| C  | -2.123100245 | 1.835732738  | -3.949864945 |
| C  | -3.381218245 | -0.404149262 | -6.194662945 |
| C  | -4.515098245 | 0.230522738  | -6.785537945 |
| C  | -4.442074245 | 0.724396738  | -8.086439945 |
| H  | -5.316852245 | 1.216222738  | -8.516532945 |
| C  | -3.275922245 | 0.629570738  | -8.842232945 |
| C  | -2.160598245 | 0.011220738  | -8.258067945 |
| H  | -1.243890245 | -0.085757262 | -8.844323945 |
| C  | -2.187991245 | -0.489075262 | -6.963328945 |
| C  | -5.787524245 | 0.411799738  | -6.014864945 |
| H  | -5.600734245 | 0.884770738  | -5.039323945 |



|   |              |              |               |
|---|--------------|--------------|---------------|
| H | -6.498212245 | 1.036210738  | -6.572837945  |
| H | -6.275248245 | -0.555248262 | -5.800003945  |
| C | -3.200172245 | 1.168860738  | -10.237868945 |
| H | -3.036819245 | 0.354091738  | -10.962072945 |
| H | -4.124691245 | 1.692868738  | -10.517766945 |
| H | -2.360739245 | 1.872376738  | -10.342429945 |
| C | -0.954594245 | -1.169655262 | -6.435245945  |
| H | -1.186891245 | -2.160153262 | -6.017484945  |
| H | -0.213572245 | -1.303833262 | -7.234701945  |
| H | -0.482572245 | -0.584447262 | -5.632777945  |
| C | -4.684459245 | -1.855558262 | -4.286956945  |
| C | -5.289290245 | -1.635543262 | -3.019515945  |
| C | -6.394665245 | -2.381996262 | -2.628324945  |
| H | -6.856460245 | -2.178267262 | -1.662126945  |
| C | -6.927980245 | -3.388354262 | -3.436689945  |
| C | -6.335297245 | -3.611956262 | -4.684650945  |
| H | -6.731550245 | -4.402898262 | -5.325658945  |
| C | -5.241039245 | -2.876722262 | -5.120200945  |
| C | -4.811823245 | -0.548926262 | -2.105171945  |
| H | -5.550580245 | -0.367740262 | -1.320875945  |
| H | -3.851713245 | -0.827526262 | -1.634153945  |
| H | -4.635577245 | 0.395765738  | -2.637261945  |
| C | -8.076541245 | -4.229158262 | -2.973657945  |
| H | -7.780016245 | -5.288414262 | -2.909106945  |
| H | -8.432531245 | -3.912711262 | -1.984417945  |
| H | -8.919884245 | -4.170146262 | -3.681000945  |
| C | -4.641404245 | -3.193040262 | -6.458940945  |
| H | -4.803395245 | -2.371544262 | -7.178721945  |
| H | -3.551549245 | -3.327716262 | -6.388111945  |
| H | -5.084556245 | -4.106880262 | -6.878905945  |
| C | 2.356193755  | 3.918204738  | -1.607782945  |
| C | 3.717218755  | 4.271097738  | -1.653253945  |
| C | 1.186081755  | 4.822211738  | -1.818800945  |
| C | 5.334350755  | 6.330625738  | -2.573884945  |
| C | 6.296260755  | 7.288894738  | -2.132060945  |
| C | 6.954545755  | 8.089930738  | -3.051073945  |
| H | 7.688569755  | 8.811019738  | -2.691737945  |
| C | 6.694159755  | 8.007264738  | -4.420874945  |
| C | 5.811719755  | 7.029871738  | -4.856428945  |
| H | 5.619641755  | 6.924207738  | -5.926150945  |
| C | 5.152972755  | 6.172631738  | -3.971525945  |
| C | 6.677730755  | 7.433362738  | -0.684059945  |
| H | 6.957541755  | 6.462763738  | -0.256264945  |
| H | 7.537881755  | 8.105678738  | -0.582629945  |
| H | 5.857557755  | 7.834130738  | -0.076211945  |
| C | 7.345186755  | 8.951662738  | -5.384717945  |
| H | 6.720018755  | 9.847138738  | -5.522576945  |
| H | 8.323093755  | 9.284184738  | -5.016676945  |
| H | 7.483112755  | 8.487325738  | -6.370288945  |
| C | 4.258132755  | 5.143192738  | -4.604277945  |
| H | 3.614389755  | 5.611922738  | -5.363499945  |
| H | 4.879443755  | 4.387921738  | -5.110996945  |
| H | 3.616508755  | 4.621005738  | -3.891071945  |
| B | -3.472196245 | -1.003292262 | -4.765373945  |
| B | 4.356645755  | 5.702251738  | -1.550651945  |
| F | 6.170552755  | 1.531353738  | -1.411933945  |
| F | 6.558385755  | 3.673183738  | -1.129811945  |
| F | 6.174524755  | 2.876416738  | -3.129561945  |
| N | 3.445760755  | 2.012274738  | -1.560158945  |
| C | 4.349537755  | 3.021662738  | -1.643153945  |
| C | 5.803650755  | 2.775866738  | -1.819606945  |
| C | 3.818616755  | 6.543450738  | -0.342555945  |
| C | 3.136483755  | 7.762372738  | -0.571741945  |

|    |             |              |              |
|----|-------------|--------------|--------------|
| C  | 2.494166755 | 8.394624738  | 0.489659055  |
| H  | 1.929293755 | 9.308737738  | 0.295806055  |
| C  | 2.525620755 | 7.880225738  | 1.788775055  |
| C  | 3.264903755 | 6.724171738  | 2.018183055  |
| H  | 3.334120755 | 6.321219738  | 3.029126055  |
| C  | 3.901826755 | 6.048247738  | 0.980391055  |
| C  | 3.033799755 | 8.371511738  | -1.944878945 |
| H  | 2.680139755 | 7.644653738  | -2.690624945 |
| H  | 2.329908755 | 9.214666738  | -1.937944945 |
| H  | 4.009716755 | 8.741513738  | -2.293370945 |
| C  | 1.762537755 | 8.548411738  | 2.891893055  |
| H  | 1.980114755 | 8.085660738  | 3.863718055  |
| H  | 2.008869755 | 9.617897738  | 2.953582055  |
| H  | 0.677094755 | 8.465129738  | 2.710214055  |
| C  | 4.730976755 | 4.843008738  | 1.300568055  |
| H  | 5.754292755 | 4.954740738  | 0.913065055  |
| H  | 4.797108755 | 4.684013738  | 2.383329055  |
| H  | 4.318645755 | 3.927151738  | 0.854680055  |
| Cu | 3.646212755 | 0.130654738  | -1.177783945 |
| F  | 0.789426755 | -4.472080262 | -1.431994945 |
| F  | 2.159831755 | -5.322194262 | -2.910480945 |
| F  | 2.239890755 | -5.998243262 | -0.831354945 |
| F  | 7.124187755 | -3.014207262 | -1.387745945 |
| F  | 6.619593755 | -2.273698262 | 0.611189055  |
| F  | 6.465082755 | -0.943417262 | -1.124388945 |
| N  | 2.673924755 | -2.528964262 | -1.195293945 |
| N  | 3.804483755 | -1.789465262 | -0.980726945 |
| C  | 3.041934755 | -3.826580262 | -1.308539945 |
| C  | 4.419655755 | -3.975486262 | -1.119535945 |
| C  | 4.847157755 | -2.655833262 | -0.917402945 |
| C  | 2.058050755 | -4.902988262 | -1.619676945 |
| C  | 6.257590755 | -2.224827262 | -0.695011945 |
| C  | 6.150971755 | -5.532718262 | 0.201247055  |
| C  | 7.464663755 | -6.035109262 | 0.033592055  |
| C  | 8.263015755 | -6.269067262 | 1.154336055  |
| H  | 9.282242755 | -6.635353262 | 1.010525055  |
| C  | 7.794106755 | -6.055110262 | 2.449668055  |
| C  | 6.494266755 | -5.572336262 | 2.608509055  |
| H  | 6.105971755 | -5.402247262 | 3.615879055  |
| C  | 5.675711755 | -5.293442262 | 1.517000055  |
| C  | 8.054952755 | -6.313407262 | -1.326226945 |
| H  | 7.847868755 | -5.504846262 | -2.040893945 |
| H  | 9.145603755 | -6.427329262 | -1.251947945 |
| H  | 7.645621755 | -7.238265262 | -1.762267945 |
| C  | 8.654370755 | -6.331334262 | 3.648843055  |
| H  | 8.203791755 | -7.112548262 | 4.279504055  |
| H  | 9.657461755 | -6.666077262 | 3.353415055  |
| H  | 8.760869755 | -5.427758262 | 4.267531055  |
| C  | 4.281178755 | -4.795635262 | 1.793134055  |
| H  | 3.516512755 | -5.388556262 | 1.271545055  |
| H  | 4.064326755 | -4.838852262 | 2.867991055  |
| H  | 4.155847755 | -3.751921262 | 1.473346055  |
| C  | 5.086521755 | -6.381374262 | -2.144119945 |
| C  | 5.174034755 | -6.037450262 | -3.516277945 |
| C  | 5.126591755 | -7.037240262 | -4.486844945 |
| H  | 5.224186755 | -6.760273262 | -5.539416945 |
| C  | 4.951490755 | -8.378745262 | -4.150765945 |
| C  | 4.830164755 | -8.707683262 | -2.801212945 |
| H  | 4.674156755 | -9.751481262 | -2.519930945 |
| C  | 4.910467755 | -7.744407262 | -1.796299945 |
| C  | 5.362860755 | -4.614856262 | -3.978069945 |
| H  | 5.606557755 | -4.590468262 | -5.049384945 |
| H  | 4.445175755 | -4.024883262 | -3.827892945 |

|   |             |               |              |
|---|-------------|---------------|--------------|
| H | 6.171314755 | -4.103994262  | -3.437006945 |
| C | 4.855923755 | -9.433464262  | -5.213195945 |
| H | 3.820404755 | -9.514602262  | -5.579075945 |
| H | 5.495826755 | -9.191805262  | -6.072124945 |
| H | 5.151440755 | -10.417323262 | -4.824882945 |
| C | 4.778377755 | -8.203304262  | -0.365413945 |
| H | 5.751697755 | -8.203052262  | 0.152222055  |
| H | 4.105462755 | -7.556676262  | 0.214624055  |
| H | 4.374489755 | -9.224735262  | -0.331170945 |
| B | 5.232621755 | -5.304863262  | -1.032539945 |
